# Supplementary material for: Reinvestigation of the internal glycan rearrangement of Lewis a and blood group type H1 epitopes
Source: Royal Society of Chemistry journal article supplement (doi:10.1039/d3cp04491b), 2024-01-01
Supplement: d3cp04491b1.pdf [file d3cp04491b1.pdf]

# Supporting Information

## Reinvestigation of the Internal Glycan Rearrangement of Lewis a and Blood Group Type 1 Epitopes

Vasilis Kontodimas,<sup>†</sup> Murat Yaman,<sup>†,¶</sup> Kim Greis,<sup>‡,§</sup> Maike Lettow,<sup>‡,§</sup> Kevin  
Pagel,<sup>‡,§</sup> and Mateusz Marianski<sup>\*,†,¶</sup>

<sup>†</sup>*Department of Chemistry, Hunter College, The City University of New York, 695 Park Ave, New York, NY 10065, USA*

<sup>‡</sup>*Fritz-Haber-Intitut der Max Planck Gesellschaft*

<sup>¶</sup>*PhD Programs in Chemistry and Biochemistry, The Graduate Center, The City University of New York, 365th Ave, New York, NY 10016, USA*

<sup>§</sup>*Institute of Chemistry and Biochemistry, Freie Universität Berlin*

### Table of Contents:

|                                                                       |    |
|-----------------------------------------------------------------------|----|
| 1. Number of unique conformers at each step.....                      | 2  |
| 2. Benchmarks .....                                                   | 3  |
| 3. Ring Puckering and distribution of glycosidic bonds.....           | 5  |
| 4. CCS vs Free energies.....                                          | 19 |
| 5. Simulated anharmonic spectra of 18 low-free energy conformers..... | 23 |
| 6. Vibrational assignment of the 18 low-energy conformers.....        | 26 |
| 7. XYZ-coordinates of 18 low-energy conformers .....                  | 44 |

**Table S1:** Unique Conformers after CREST search. The highlighted rows indicate conformers that increased number of unique structures after the second search.

| Bond Configuration | Search 1   | Search 2   | Combined   |
|--------------------|------------|------------|------------|
| Fuc_a12a           | 64         | 69         | 37         |
| Fuc_a12b           | 36         | 35         | 23         |
| Fuc_a13a           | 39         | 63         | 59         |
| Fuc_a13b           | 33         | 33         | 29         |
| Fuc_a14a           | 62         | 20         | 34         |
| <b>Fuc_a14b</b>    | <b>47</b>  | <b>39</b>  | <b>48</b>  |
| Fuc_a16a           | 23         | 51         | 30         |
| <b>Fuc_a16b</b>    | <b>39</b>  | <b>40</b>  | <b>40</b>  |
| Fuc_an12a          | 54         | 62         | 46         |
| Fuc_an12b          | 49         | 74         | 45         |
| Fuc_an14a          | 85         | 34         | 70         |
| Fuc_an14b          | 23         | 27         | 11         |
| Fuc_an16a          | 37         | 87         | 74         |
| Fuc_an16b          | 32         | 31         | 28         |
| <b>Fuc_b12a</b>    | <b>79</b>  | <b>77</b>  | <b>109</b> |
| Fuc_b12b           | 24         | 13         | 19         |
| Fuc_b13a           | 45         | 28         | 45         |
| <b>Fuc_b13b</b>    | <b>54</b>  | <b>63</b>  | <b>64</b>  |
| Fuc_b14a           | 13         | 24         | 20         |
| Fuc_b14b           | 19         | 17         | 18         |
| Fuc_b16a           | 22         | 18         | 15         |
| Fuc_b16b           | 58         | 52         | 58         |
| Fuc_bn12a          | 96         | 88         | 96         |
| <b>Fuc_bn12b</b>   | <b>109</b> | <b>87</b>  | <b>112</b> |
| Fuc_bn14a          | 19         | 23         | 19         |
| Fuc_bn14b          | 73         | 54         | 67         |
| <b>Fuc_bn16a</b>   | <b>65</b>  | <b>87</b>  | <b>116</b> |
| <b>Fuc_bn16b</b>   | <b>82</b>  | <b>142</b> | <b>150</b> |

**Table S2:** Summary of the number of the individual DFT optimizations in 6-31+G(d,p) basis set (small basis, **SB**), and optimizations + frequency calculations in 6-311+G(d,p) basis set (large basis, **LB**).

| Anomer             |               | alpha |     |      |     | beta  |    |      |     |
|--------------------|---------------|-------|-----|------|-----|-------|----|------|-----|
| Bond configuration |               | alpha |     | beta |     | alpha |    | beta |     |
| Fuc Bond           |               | SB    | LB  | SB   | LB  | SB    | LB | SB   | LB  |
| 1-2                | <b>GlcNAc</b> | 46    | 13  | 96   | 22  | 45    | 9  | 112  | 11  |
| 1-4                | <b>GlcNAc</b> | 70    | 28  | 19   | 13  | 11    | 6  | 67   | 30  |
| 1-6                | <b>GlcNAc</b> | 74    | 37  | 116  | 35  | 28    | 18 | 150  | 41  |
| 1-2                | <b>Gal</b>    | 37    | 15  | 109  | 66  | 23    | 13 | 19   | 8   |
| 1-3                | <b>Gal</b>    | 58    | 25  | 45   | 23  | 29    | 13 | 64   | 30  |
| 1-4                | <b>Gal</b>    | 34    | 17  | 20   | 9   | 48    | 23 | 18   | 7   |
| 1-6                | <b>Gal</b>    | 30    | 14  | 15   | 7   | 37    | 15 | 58   | 34  |
|                    |               |       |     |      |     |       |    |      |     |
| <b>Sum</b>         |               | 497   | 193 | 420  | 175 | 221   | 97 | 488  | 161 |

**Table S3:** Benchmark results of most stable conformers of eight molecule's relative free energies based on several functionals with the Mean Absolute Error (MAE) values.

|                   | <b>a12a</b> | <b>a16a</b> | <b>an14a</b> | <b>bn16a</b> | <b>a12b</b> | <b>a16b</b> | <b>an14b</b> | <b>bn16b</b> | <b>MAE</b> |
|-------------------|-------------|-------------|--------------|--------------|-------------|-------------|--------------|--------------|------------|
| <b>B3LYP</b>      | 6.1         | 6.5         | 4.6          | 4.3          | 5.2         | 0.0         | 4.3          | 7.6          | <b>4.8</b> |
| <b>B3LYP+D3</b>   | 0.5         | 0.6         | 0.6          | 0.5          | 0.7         | 0.0         | 0.5          | 0.7          | <b>0.5</b> |
| <b>PBE1PBE</b>    | 4.0         | 4.3         | 3.1          | 2.8          | 3.6         | 0.0         | 3.2          | 5.3          | <b>3.3</b> |
| <b>PBE1PBE+D3</b> | 0.4         | 0.4         | 0.5          | 0.0          | 0.7         | 0.0         | 0.6          | 0.1          | <b>0.3</b> |
| <b>M062x</b>      | 0.9         | 0.3         | 0.5          | 0.2          | 0.8         | 0.0         | 0.1          | 0.4          | <b>0.4</b> |
| <b>M06</b>        | 1.5         | 1.4         | 1.8          | 0.6          | 1.6         | 0.0         | 0.4          | 1.1          | <b>1.0</b> |
| <b>wB97XD</b>     | 1.0         | 1.0         | 0.6          | 1.3          | 0.9         | 0.0         | 0.2          | 1.3          | <b>0.8</b> |
| <b>HSEH1PBE</b>   | 3.8         | 3.9         | 3.0          | 2.5          | 3.6         | 0.0         | 3.0          | 5.2          | <b>3.1</b> |
| <b>X3LYP</b>      | 5.4         | 5.7         | 4.0          | 3.8          | 4.7         | 0.0         | 3.8          | 6.8          | <b>4.3</b> |
| <b>M11</b>        | 2.8         | 1.8         | 1.8          | 2.0          | 2.1         | 0.0         | 0.8          | 3.2          | <b>1.8</b> |
| <b>MN15</b>       | 2.9         | 0.7         | 1.8          | 0.8          | 2.2         | 0.0         | 0.4          | 2.1          | <b>1.4</b> |
| <b>CAM-B3LYP</b>  | 4.1         | 4.2         | 2.8          | 2.5          | 3.5         | 0.0         | 2.8          | 5.2          | <b>3.1</b> |

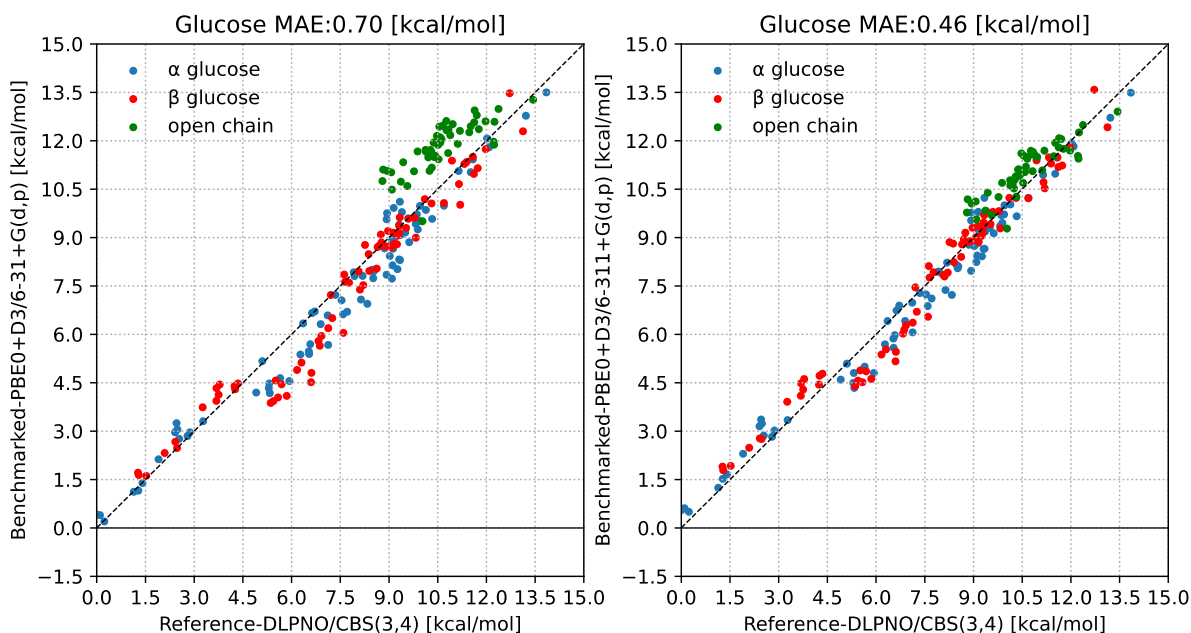

**Figure S1:** DLPNO/CBS(3,4) energies on x-axis, compared with PBE0+D3/6-31+G(d,p) and PBE0+D3/6-311+G(d,p) energies on y-axis for glucose, respectively. The relative energies (in kcal/mol) are calculated with respect to the lowest-energy conformer. The mean absolute error (MAE) between the two data sets, which includes a shift along the y-axis, is shown above.

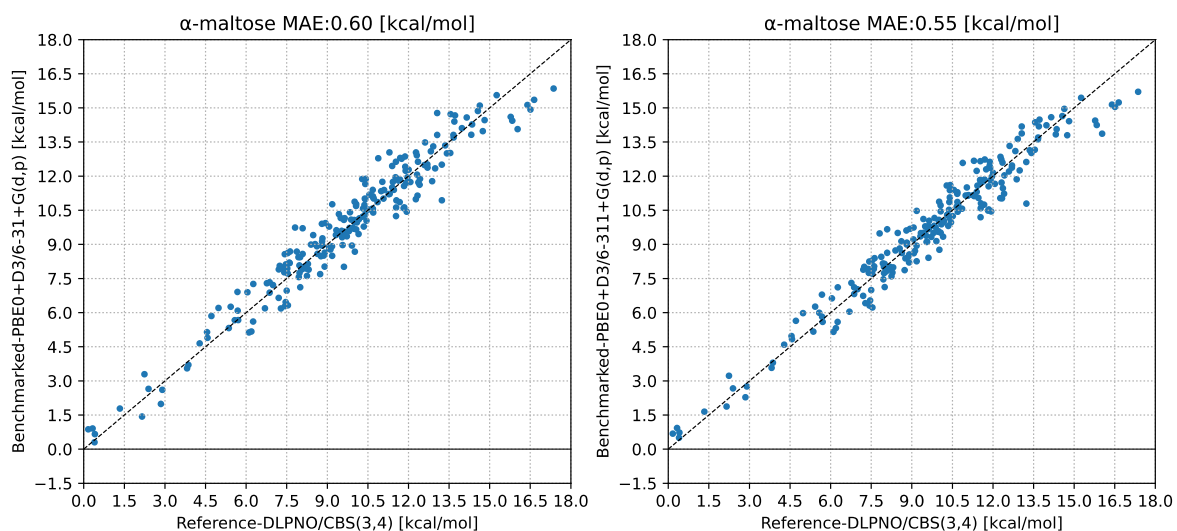

**Figure S2:** DLPNO/CBS(3,4) energies on x-axis, compared with PBE0+D3/6-31+G(d,p) and PBE0+D3/6-311+G(d,p) energies on y-axis for  $\alpha$ -maltose, respectively. The relative energies (in kcal/mol) are calculated with respect to the lowest-energy conformer. The mean absolute error (MAE) between the two data sets, which includes a shift along the y-axis, is shown above.

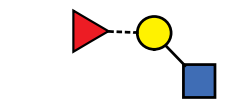

$\alpha$ -anomer

$$\Delta E = 4.7 \text{ kcal mol}^{-1}$$

$$\Delta F = 2.4 \text{ kcal mol}^{-1}$$

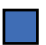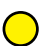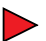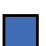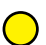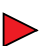

$\beta$ -anomer

$$\Delta E = 4.8 \text{ kcal mol}^{-1}$$

$$\Delta F = 3.6 \text{ kcal mol}^{-1}$$

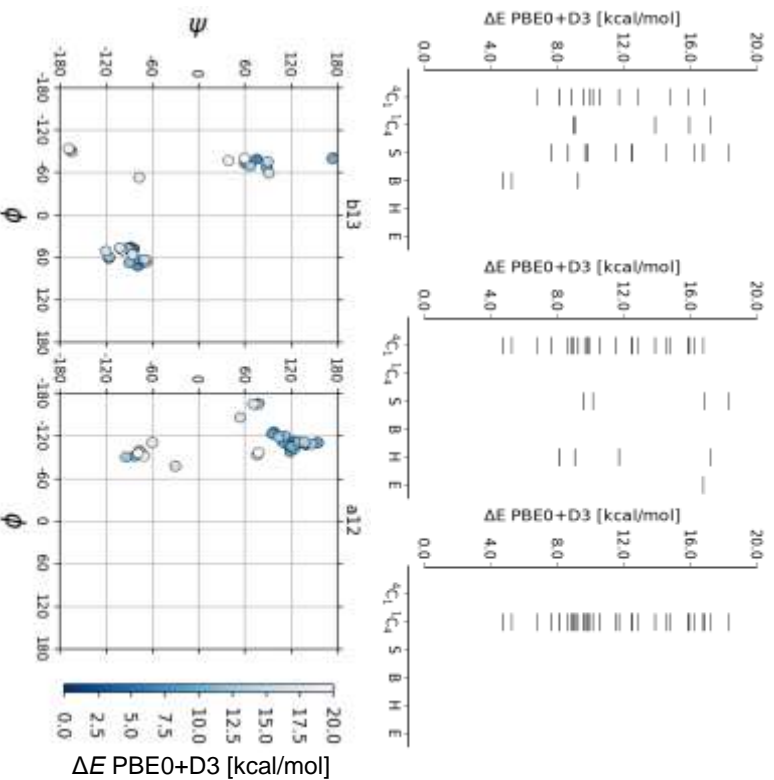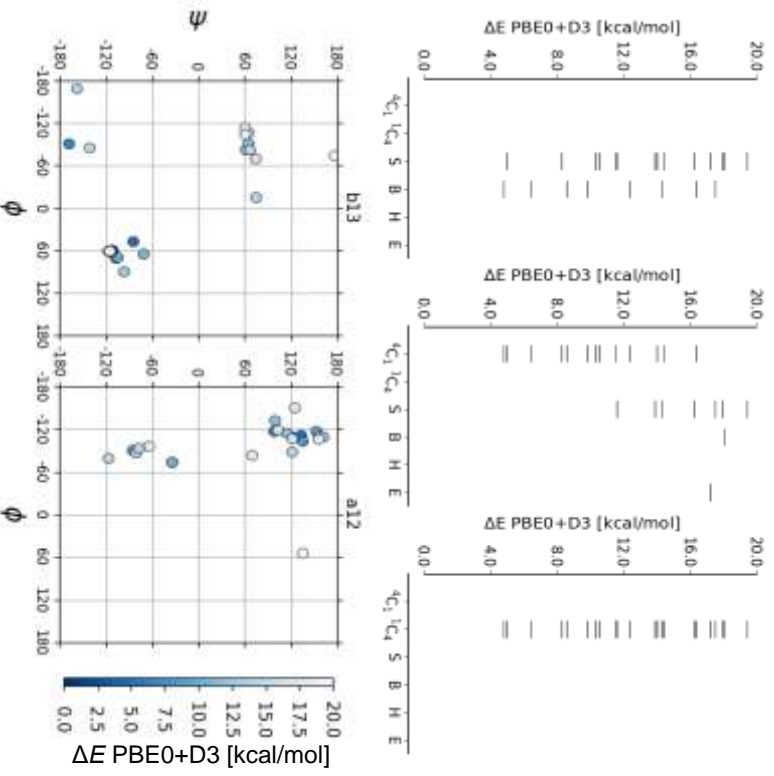

**Figure S3:** (Top) A comparison is made between the individual ring puckers of the [BG-H1+H]<sup>+</sup> ions and their relative energy with respect to the lowest energy conformer of **Fuc**(1)  $\rightarrow$  **6)Gal**(1)  $\rightarrow$  **3)GlcNAc** ions. The energy calculations were performed using the PBE0+D3/6-31+(d,p) level of theory. The left plot displays the  $\alpha$ -anomer, while the right plot shows the  $\beta$ -anomer. The top portion of each plot indicates the relative energy of the lowest energy conformer ( $\Delta E$ ), while the  $\Delta F$  value represents the free energy of the ions after higher level theory calculations. (Bottom) The plots illustrate the distributions of the two glycosidic bond angles between each monomer. The b13 angle corresponds to the bond between GlcNAc and Gal, while the a12 angle represents the bond between Fuc and Gal.

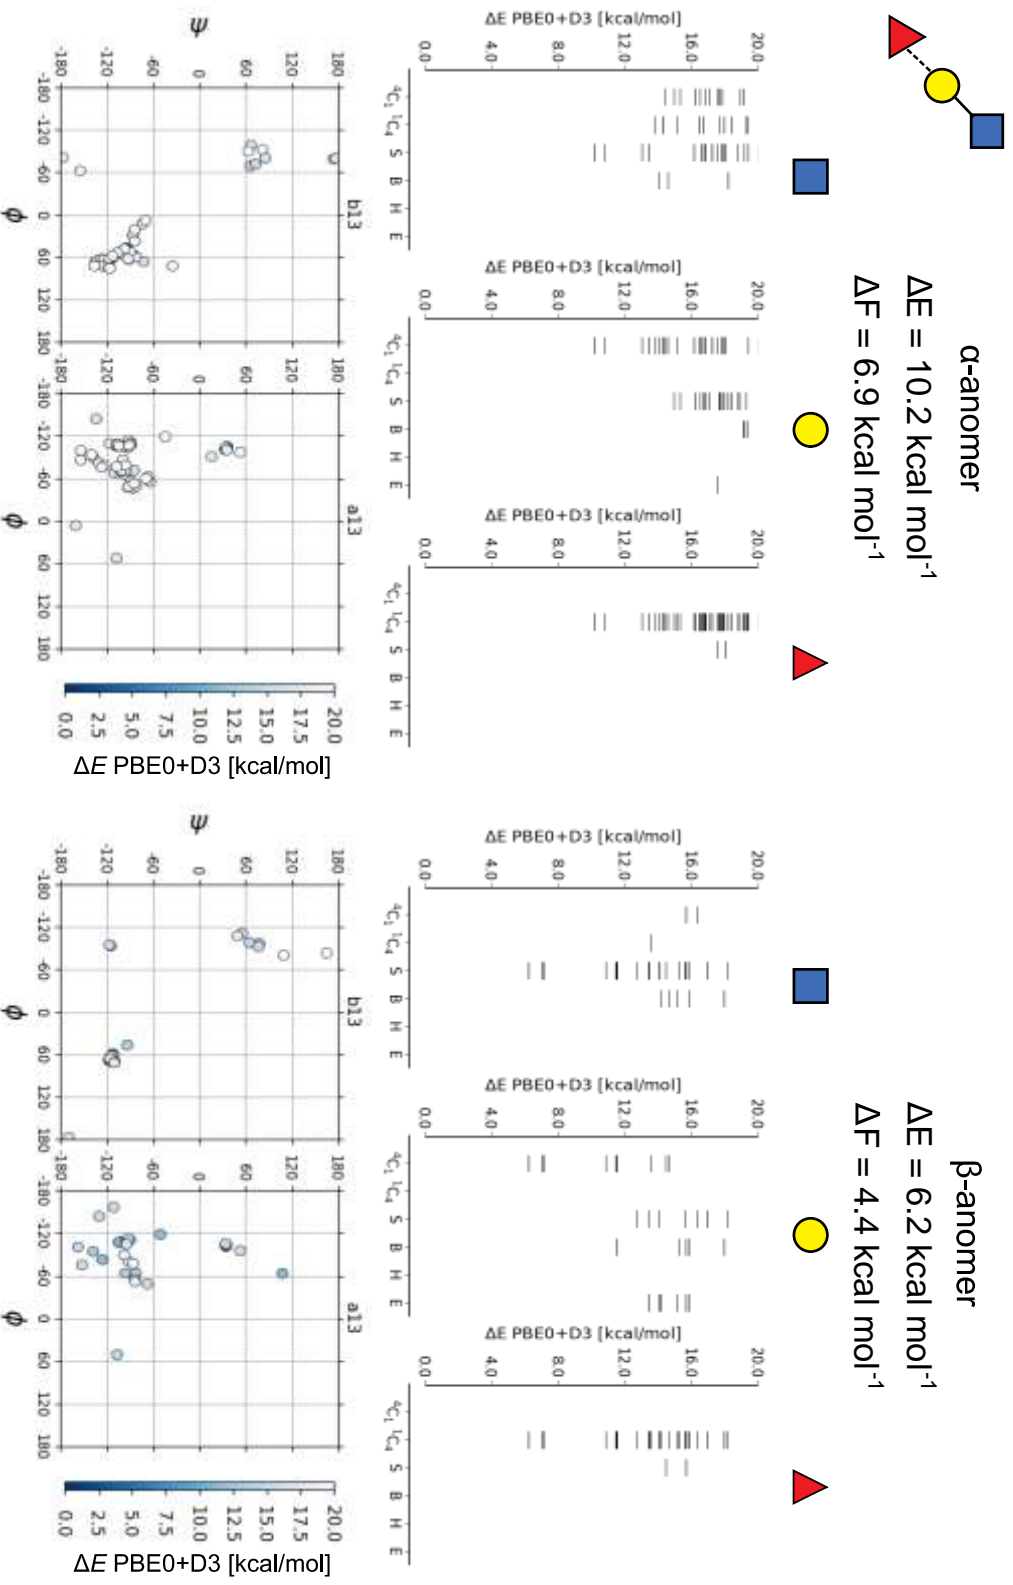

**Figure S4:** (Top) A comparison is made between the individual ring puckers of the **Fuca(1) → 3)Gal(1) → 3)GlcNAc(1) → 3)Gal(1) → 3)GlcNAc(1)** ions and their relative energy with respect to the lowest energy conformer of **Fuca(1) → 6)Gal(1) → 3)GlcNAc(1)** ions. The energy calculations were performed using the PBE0+D3/6-31+(d,p) level of theory. The left plot displays the  $\alpha$ -anomer, while the right plot shows the  $\beta$ -anomer. The top portion of each plot indicates the relative energy of the lowest energy conformer ( $\Delta E$ ), while the  $\Delta F$  value represents the free energy of the ions after higher level theory calculations. (Bottom) The plots illustrate the distributions of the two glycosidic bond angles between each monomer. The  $b_{13}$  angle corresponds to the bond between GlcNAc and Gal, while the  $a_{13}$  angle represents the bond between Fuc and Gal

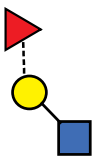

$\alpha$ -anomer

$$\Delta E = 8.1 \text{ kcal mol}^{-1}$$

$$\Delta F = 6.4 \text{ kcal mol}^{-1}$$

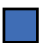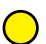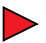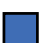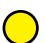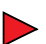

$\beta$ -anomer

$$\Delta E = 6.5 \text{ kcal mol}^{-1}$$

$$\Delta F = 5.5 \text{ kcal mol}^{-1}$$

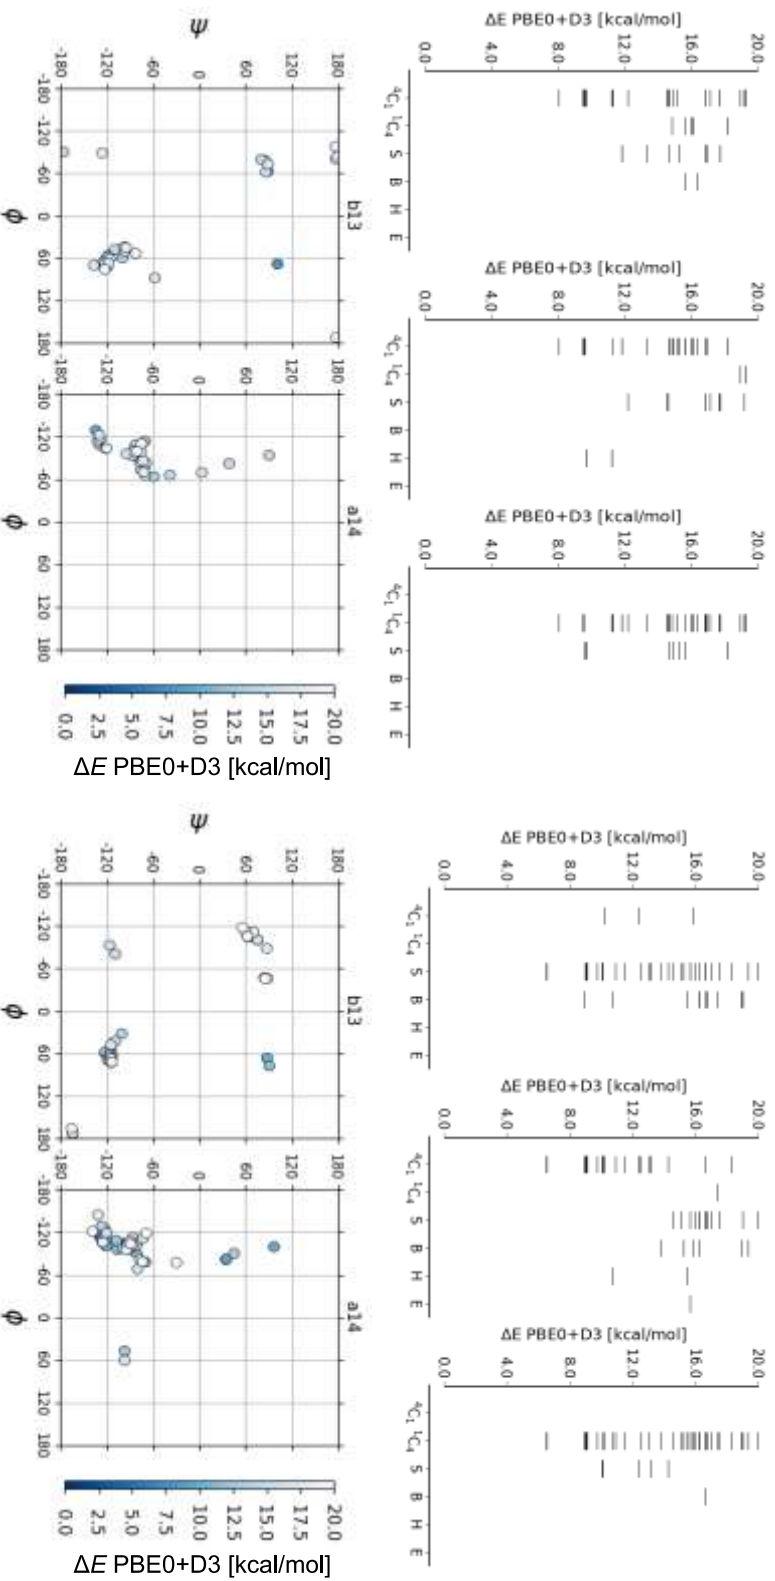

**Figure S5:** (Top) A comparison is made between the individual ring puckers of the **Fuca(1) → 4)Gal(1) → 3)GlcNAc** ions and their relative energy with respect to the lowest energy conformer of **Fuca(1) → 6)Gal(1) → 3)GlcNAc** ions. The energy calculations were performed using the PBE0+D3/6-31+(d,p) level of theory. The left plot displays the  $\alpha$ -anomer, while the right plot shows the  $\beta$ -anomer. The top portion of each plot indicates the relative energy of the lowest energy conformer ( $\Delta E$ ), while the  $\Delta F$  value represents the free energy of the ions after higher level theory calculations. (Bottom) The plots illustrate the distributions of the two glycosidic bond angles between each monomer. The  $b_{13}$  angle corresponds to the bond between GlcNAc and Gal, while the  $a_{14}$  angle represents the bond between Fuc and Gal.





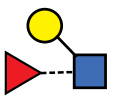

$\alpha$ -anomer

$$\Delta E = 10.6 \text{ kcal mol}^{-1}$$

$$\Delta F = 6.0 \text{ kcal mol}^{-1}$$

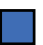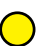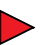

$\beta$ -anomer

$$\Delta E = 10.4 \text{ kcal mol}^{-1}$$

$$\Delta F = 7.0 \text{ kcal mol}^{-1}$$

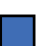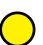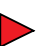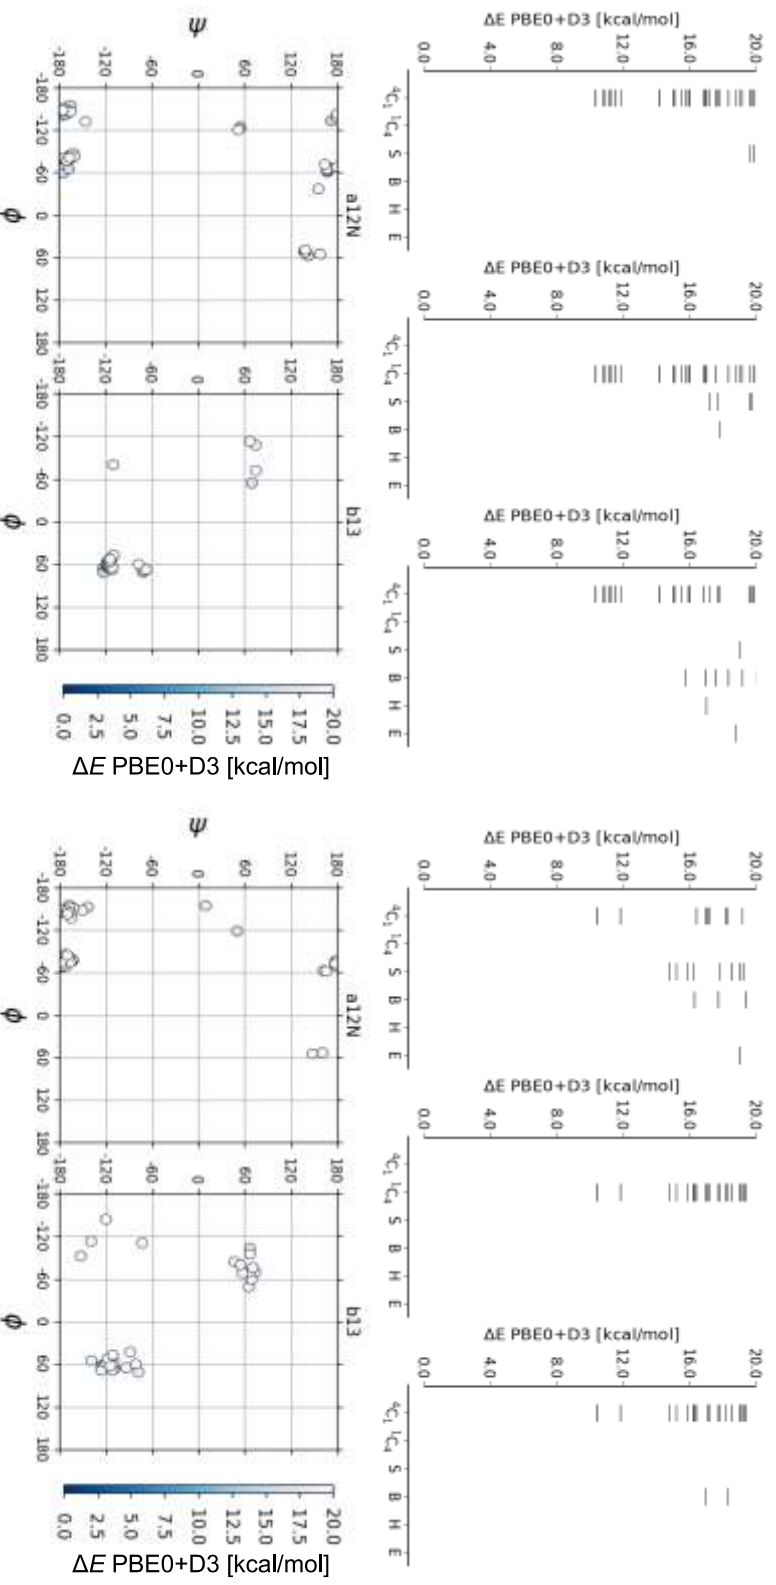

**Figure S7:** (Top) A comparison is made between the individual ring puckers of the Gal(1)  $\rightarrow$  3)GlcNAc ions and their relative energy with respect to the lowest energy conformer of Fuca(1)  $\rightarrow$  6)Gal(1)  $\rightarrow$  3)GlcNAc(1)  $\rightarrow$  2)GlcNAc ions. The energy calculations were performed using the PBE0+D3/6-31+(d,p) level of theory. The left plot displays the  $\alpha$ -anomer, while the right plot shows the  $\beta$ -anomer. The top portion of each plot indicates the relative energy of the lowest energy conformer ( $\Delta E$ ), while the  $\Delta F$  value represents the free energy of the ions after higher level theory calculations. (Bottom) Distributions of the two glycosidic bonds angles between each monomer. The b13 corresponds to the bond between the GlcNAc and Gal, and a12 to the bond between Fuc and GlcNAc

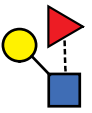

$\alpha$ -anomer

$$\Delta E = 7.6 \text{ kcal mol}^{-1}$$

$$\Delta F = 5.8 \text{ kcal mol}^{-1}$$

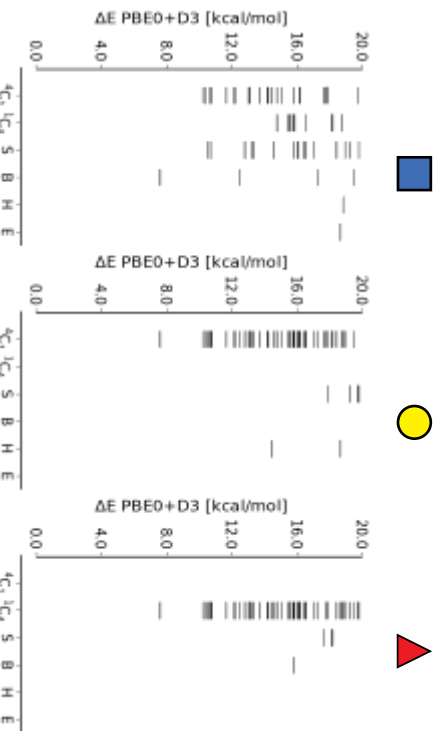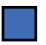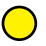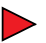

$\beta$ -anomer

$$\Delta E = 7.8 \text{ kcal mol}^{-1}$$

$$\Delta F = 6.4 \text{ kcal mol}^{-1}$$

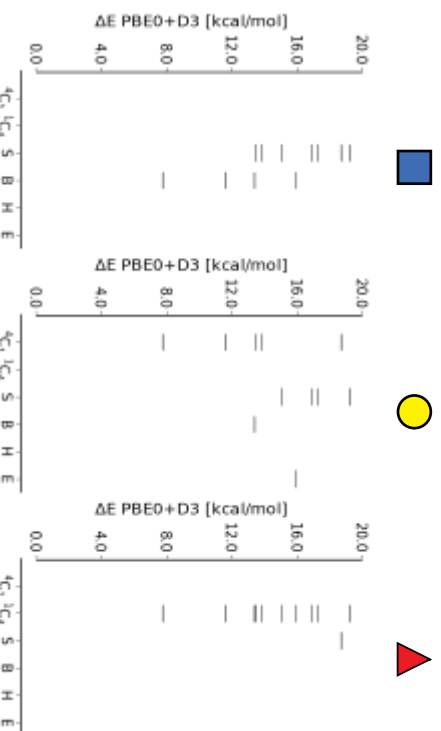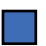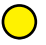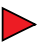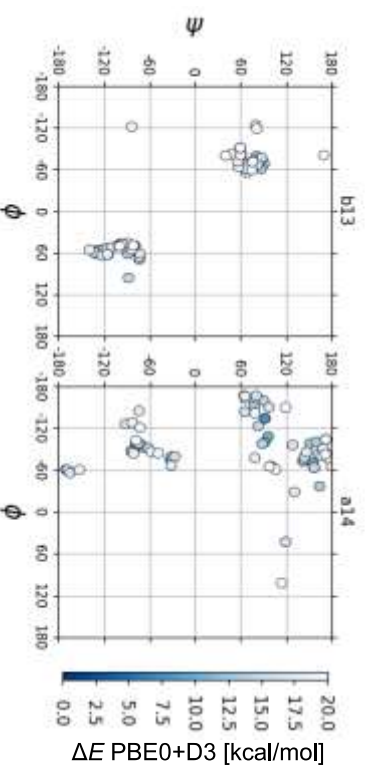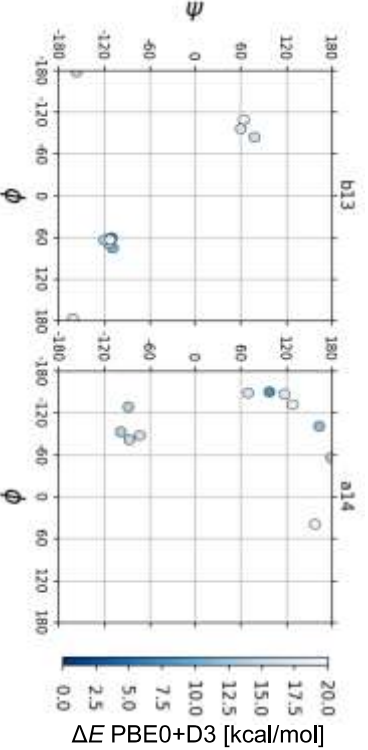

**Figure S8:** (Top) A comparison is made between the individual ring puckers of the  $[\text{Le}^{\alpha}+\text{H}]^+$  ions and their relative energy with respect to the lowest energy conformer of **Fuca(1  $\rightarrow$  6)Gal $\beta$ (1  $\rightarrow$  3)GlcNAc $\beta$**  ions. The energy calculations were performed using the PBE0+D3/6-31+(d,p) level of theory. The left plot displays the  $\alpha$ -anomer, while the right plot shows the  $\beta$ -anomer. The top portion of each plot indicates the relative energy of the lowest energy conformer ( $\Delta E$ ), while the  $\Delta F$  value represents the free energy of the ions after higher level theory calculations. (Bottom) Distributions of the two glycosidic bonds angles between each monomer. The b13 corresponds to the bond between the GlcNAc and Gal, and a14 to the bond between Fuc and GlcNAc

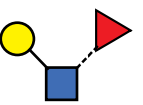

$\alpha$ -anomer

$$\Delta E = 7.1 \text{ kcal mol}^{-1}$$

$$\Delta F = 3.8 \text{ kcal mol}^{-1}$$

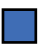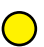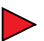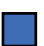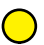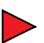

$\beta$ -anomer

$$\Delta E = 6.6 \text{ kcal mol}^{-1}$$

$$\Delta F = 2.7 \text{ kcal mol}^{-1}$$

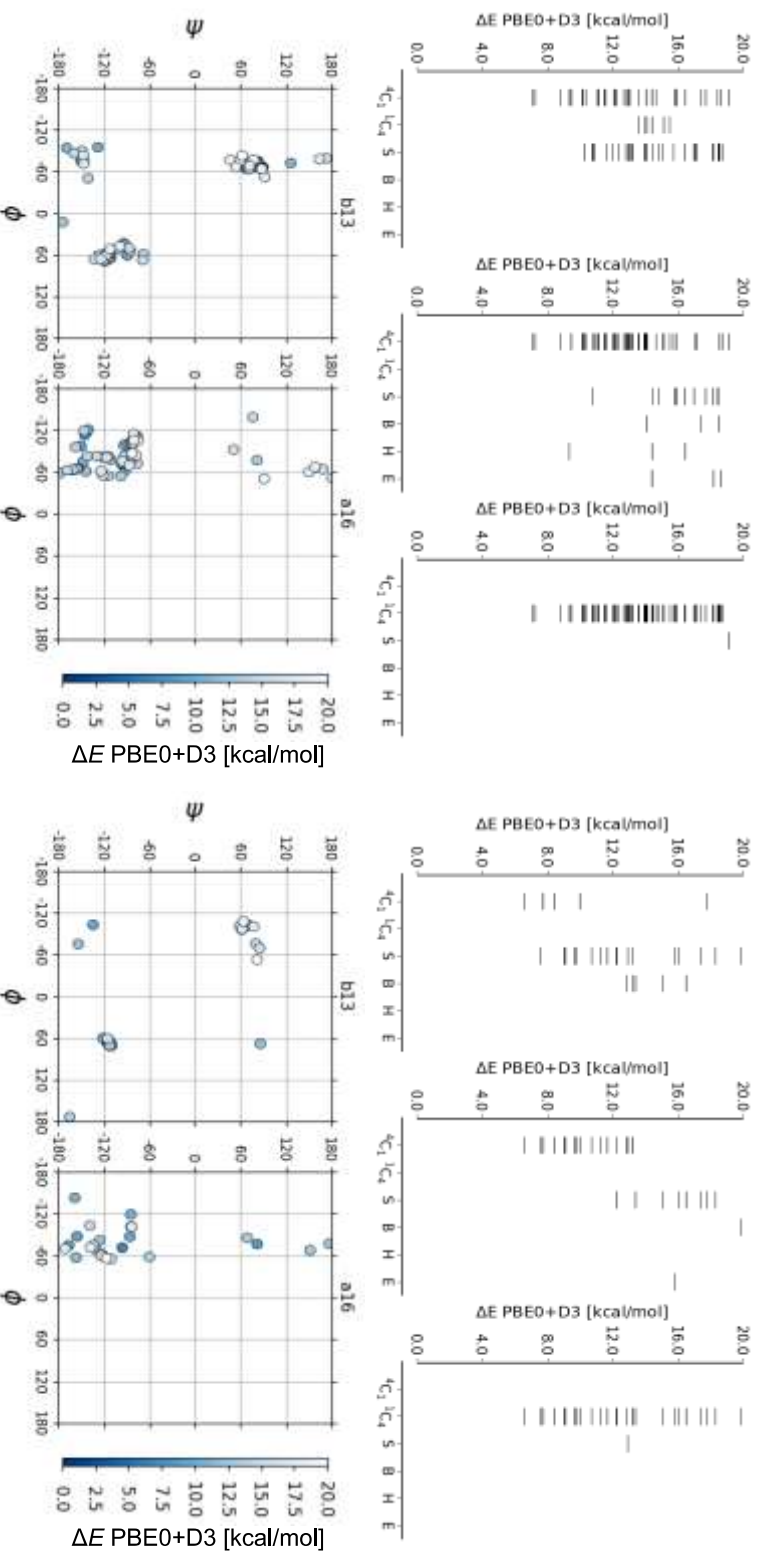

**Figure S9:** (Top) A comparison is made between the individual ring puckers of the Gal $\beta$ (1  $\rightarrow$  3)Fuc $\alpha$ (1  $\rightarrow$  6)]GlcNAc ions and their relative energy with respect to the lowest energy conformer of Fuc $\alpha$ (1  $\rightarrow$  6)Gal $\beta$ (1  $\rightarrow$  3)GlcNAc $\beta$  ions. The energy calculations were performed using the PBE0+D3/6-31+(d,p) level of theory. The left plot displays the  $\alpha$ -anomer, while the right plot shows the  $\beta$ -anomer. The top portion of each plot indicates the relative energy of the lowest energy conformer ( $\Delta E$ ), while the  $\Delta F$  value represents the free energy of the ions after higher level theory calculations. (Bottom) Distributions of the two glycosidic bonds angles between each monomer. The b13 corresponds to the bond between the GlcNAc and Gal, and a16 to the bond between Fuc and GlcNAc.

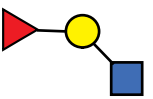

$\alpha$ -anomer

$$\Delta E = 5.4 \text{ kcal mol}^{-1}$$

$$\Delta F = 3.3 \text{ kcal mol}^{-1}$$

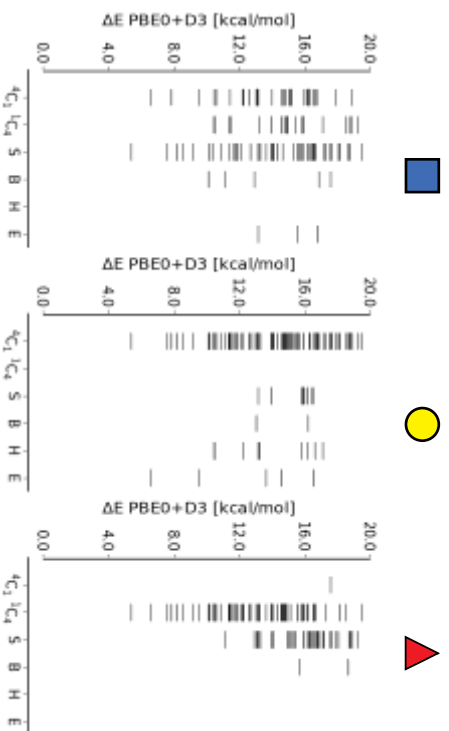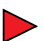

$\beta$ -anomer

$$\Delta E = 4.0 \text{ kcal mol}^{-1}$$

$$\Delta F = 2.2 \text{ kcal mol}^{-1}$$

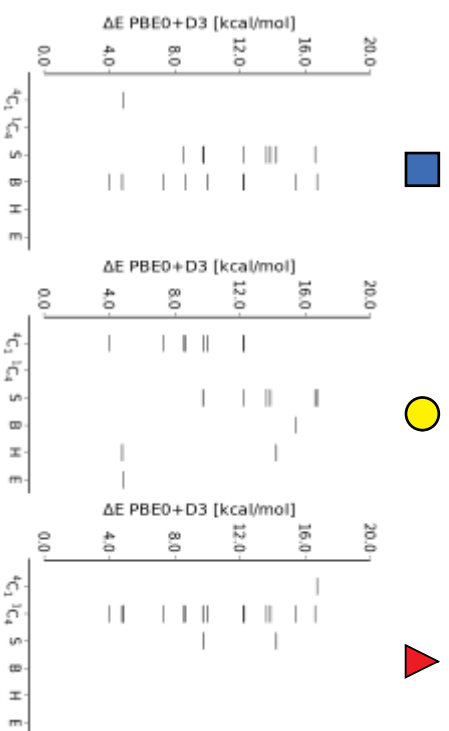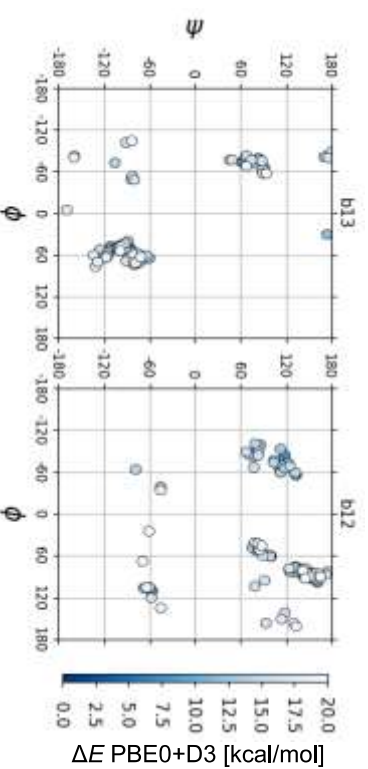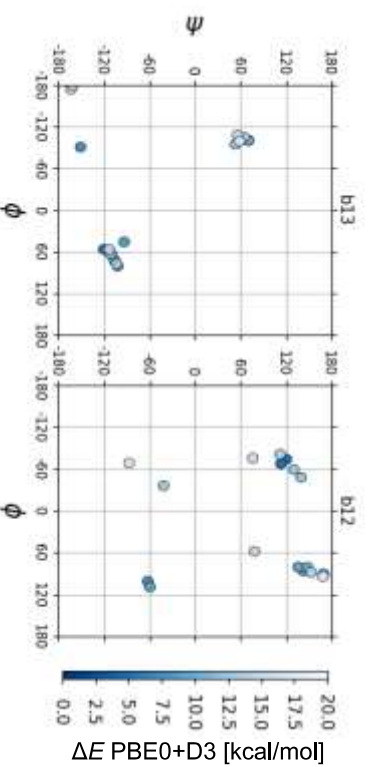

**Figure S10:** (Top) A comparison is made between the individual ring puckers of the **Fuc $\alpha$ (1  $\rightarrow$  2)Gal $\beta$ (1  $\rightarrow$  3)GlcNAc** ions and their relative energy with respect to the lowest energy conformer of **Fuc $\alpha$ (1  $\rightarrow$  6)Gal $\beta$ (1  $\rightarrow$  3)GlcNAc $\beta$**  ions. The energy calculations were performed using the PBE0+D3/6-31+(d,p) level of theory. The left plot displays the  $\alpha$ -anomer, while the right plot shows the  $\beta$ -anomer. The top portion of each plot indicates the relative energy of the lowest energy conformer ( $\Delta E$ ), while the  $\Delta F$  value represents the free energy of the ions after higher level theory calculations. (Bottom) Distributions of the two glycosidic bonds angles between each monomer. The b13 corresponds to the bond between the GlcNAc and Gal, and b12 to the bond between Fuc and Gal.

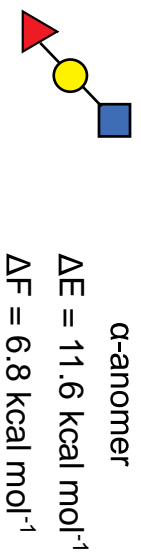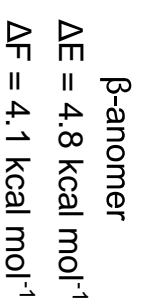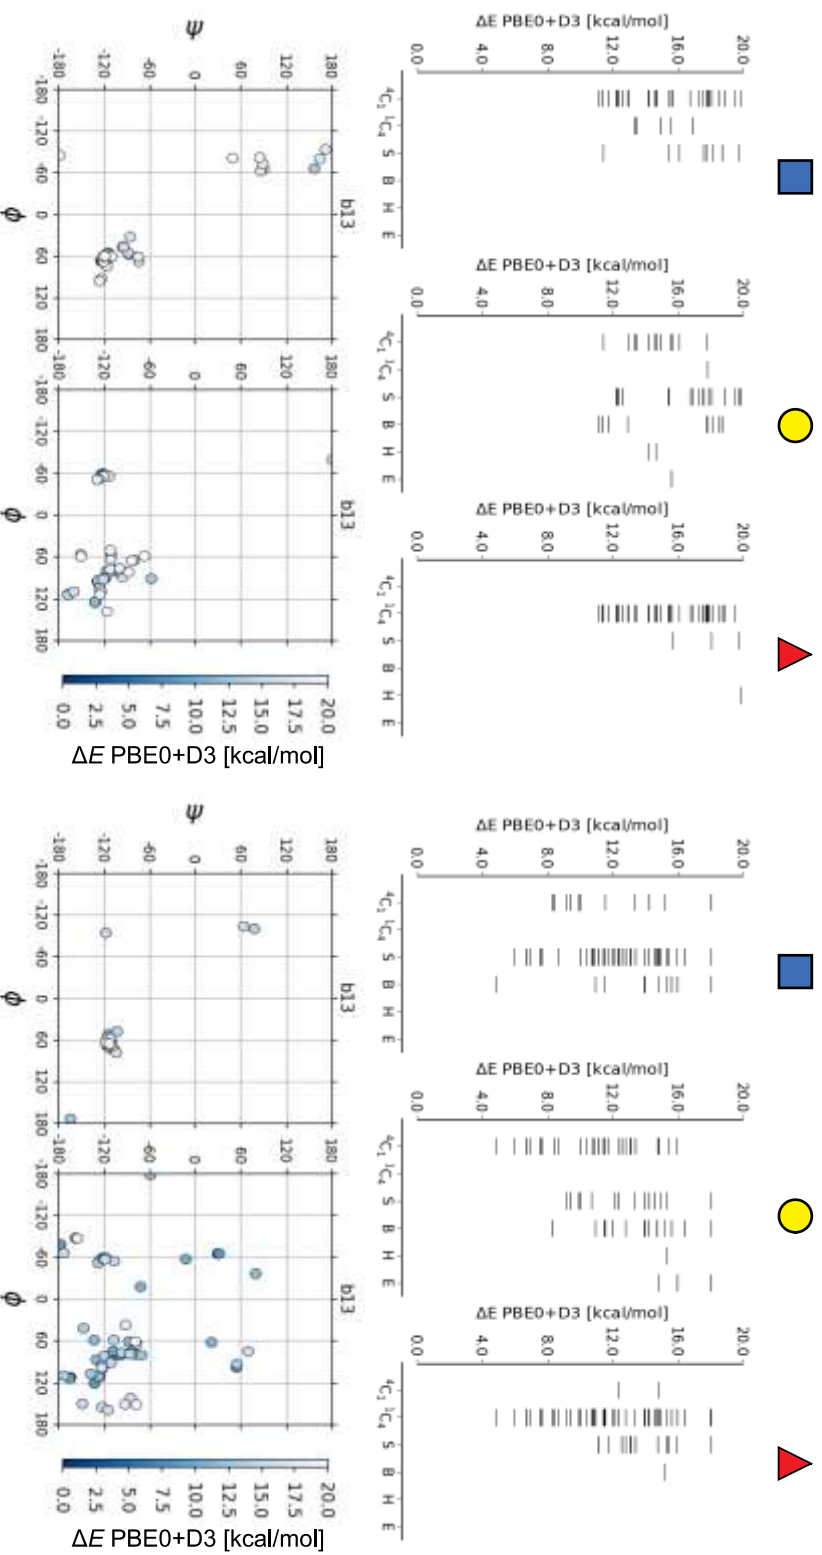

**Figure S11:** (Top) A comparison is made between the individual ring puckers of the **Fuc $\beta$ (1  $\rightarrow$  3)Gal $\beta$ (1  $\rightarrow$  3)GlcNAc $\beta$**  ions. The energy calculations were performed using the PBE0+D3/6-31+(d,p) respect to the lowest energy conformer of **Fuca(1  $\rightarrow$  6)Gal $\beta$ (1  $\rightarrow$  3)GlcNAc $\beta$**  ions. The energy calculations were performed using the PBE0+D3/6-31+(d,p) level of theory. The left plot displays the  $\alpha$ -anomer, while the right plot shows the  $\beta$ -anomer. The top portion of each plot indicates the relative energy of the lowest energy conformer ( $\Delta E$ ), while the  $\Delta F$  value represents the free energy of the ions after higher level theory calculations. (Bottom) Distributions of the two glycosidic bonds angles between each monomer. The b13 corresponds to the bond between the GlcNAc and Gal, and b13 corresponds to the bond between Fuc and Gal.

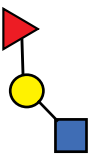

$\alpha$ -anomer

$$\Delta E = 5.0 \text{ kcal mol}^{-1}$$

$$\Delta F = 6.3 \text{ kcal mol}^{-1}$$

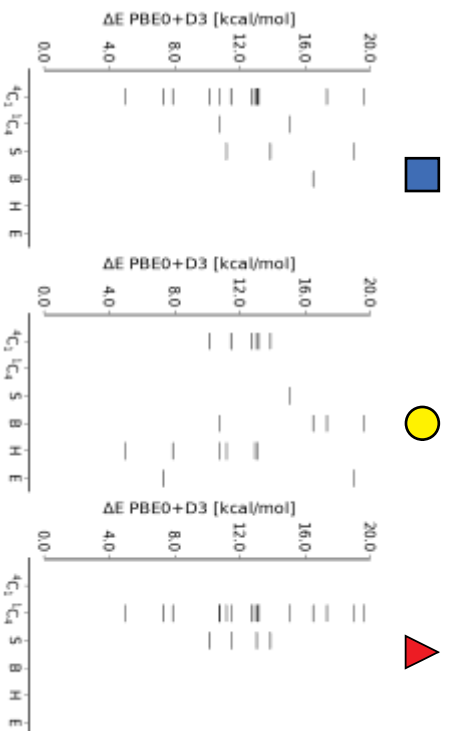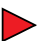

$\beta$ -anomer

$$\Delta E = 3.9 \text{ kcal mol}^{-1}$$

$$\Delta F = 1.7 \text{ kcal mol}^{-1}$$

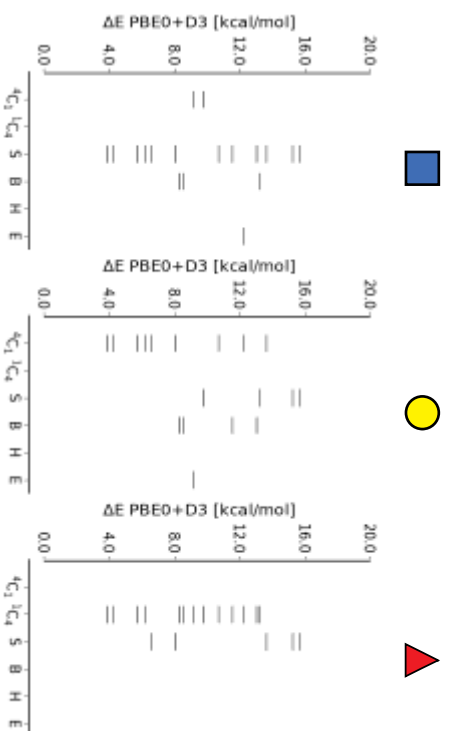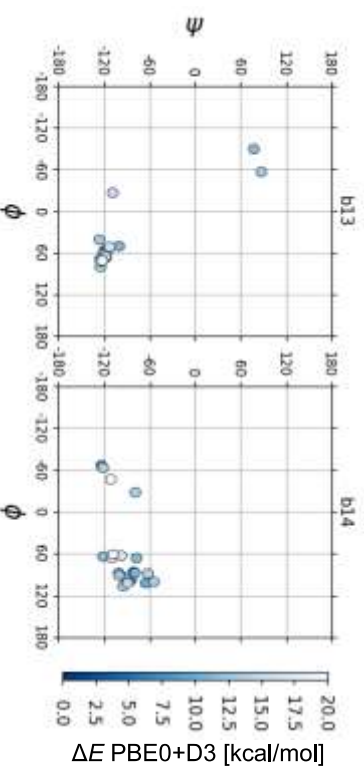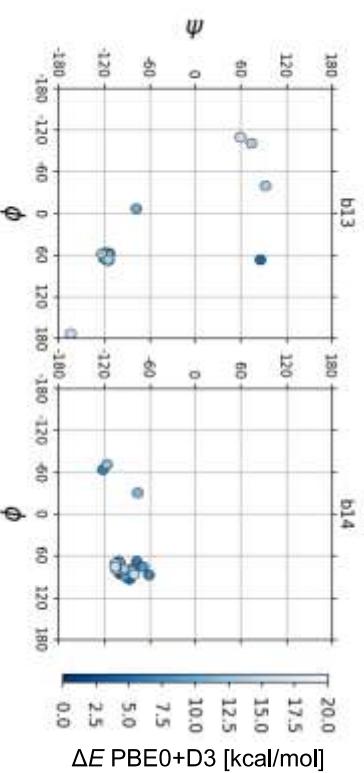

**Figure S12:** (Top) A comparison is made between the individual ring puckers of the **Fuc $\beta$ (1  $\rightarrow$  4)Gal $\beta$ (1  $\rightarrow$  3)GlcNAc** ions and their relative energy with respect to the lowest energy conformer of **Fuc $\alpha$ (1  $\rightarrow$  6)Gal $\beta$ (1  $\rightarrow$  3)GlcNAc $\beta$**  ions. The energy calculations were performed using the PBE0+D3/6-31+(d,p) level of theory. The left plot displays the  $\alpha$ -anomer, while the right plot shows the  $\beta$ -anomer. The top portion of each plot indicates the relative energy of the lowest energy conformer ( $\Delta E$ ), while the  $\Delta F$  value represents the free energy of the ions after higher level theory calculations. (Bottom) Distributions of the two glycosidic bonds angles between each monomer. The b13 corresponds to the bond between the GlcNAc and Gal, and b14 to the bond between Fuc and Gal.

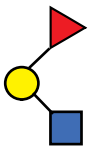

$\alpha$ -anomer

$$\Delta E = 6.4 \text{ kcal mol}^{-1}$$

$$\Delta F = 4.2 \text{ kcal mol}^{-1}$$

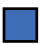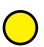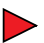

$\beta$ -anomer

$$\Delta E = 5.4 \text{ kcal mol}^{-1}$$

$$\Delta F = 4.1 \text{ kcal mol}^{-1}$$

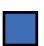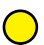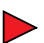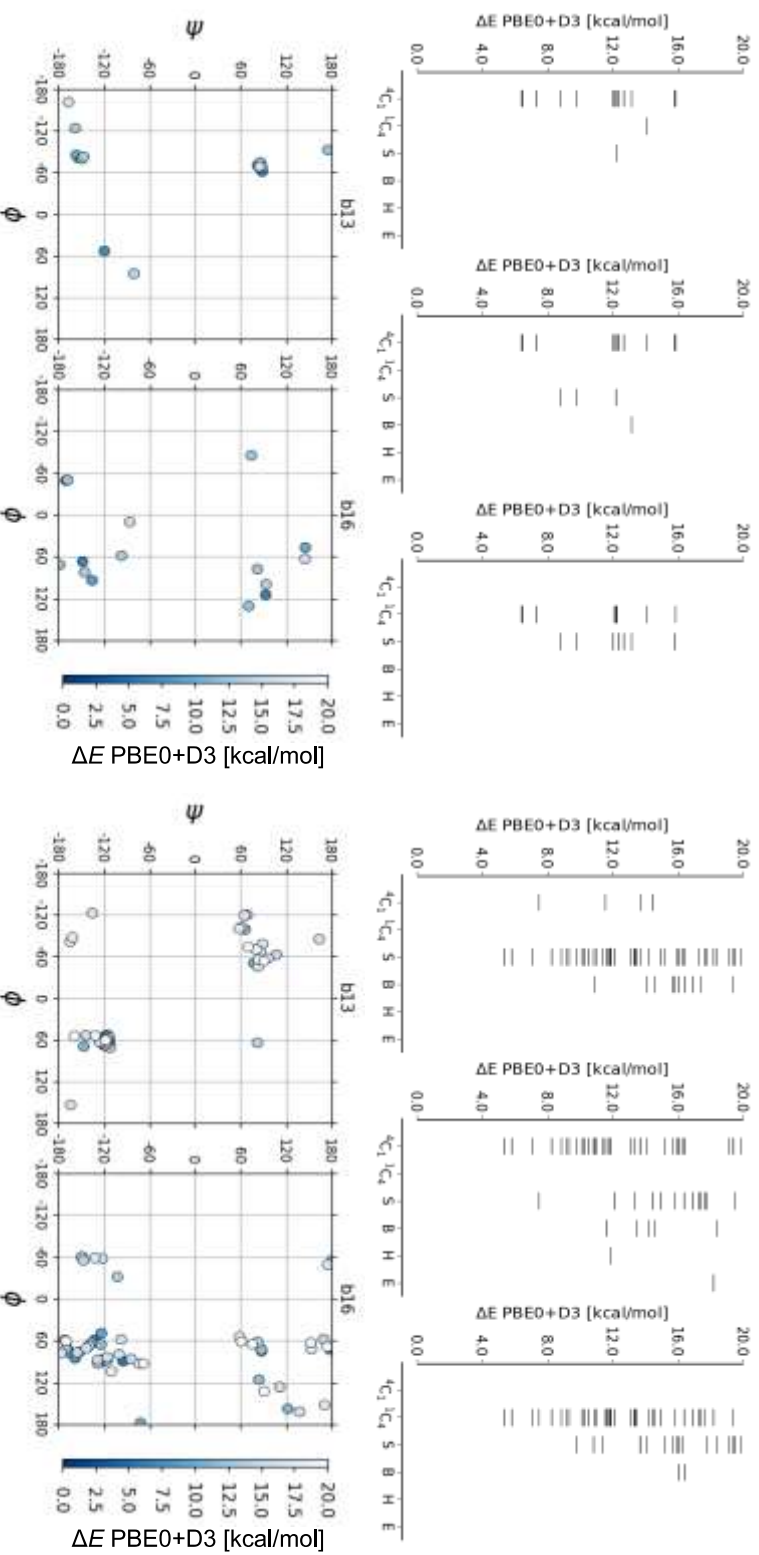

**Figure S13:** (Top) A comparison is made between the individual ring puckers of the **Fuca**( $\beta$ 1  $\rightarrow$  6)**Gal**( $\beta$ 1  $\rightarrow$  3)**GlcNAc**( $\beta$  ions. The energy calculations were performed using the PBE0+D3/6-31+(d,p) level of theory. The left plot displays the  $\alpha$ -anomer, while the right plot shows the  $\beta$ -anomer. The top portion of each plot indicates the relative energy of the lowest energy conformer ( $\Delta E$ ), while the  $\Delta F$  value represents the free energy of the ions after higher level theory calculations. (Bottom) Distributions of the two glycosidic bonds angles between each monomer. The b13 corresponds to the bond between the GlcNAc and Gal, and b16 to the bond between Fuc and Gal.

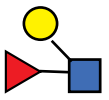

$\alpha$ -anomer

$$\Delta E = 13.0 \text{ kcal mol}^{-1}$$

$$\Delta F = 8.0 \text{ kcal mol}^{-1}$$

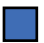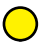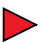

$\beta$ -anomer

$$\Delta E = 13.3 \text{ kcal mol}^{-1}$$

$$\Delta F = 10.6 \text{ kcal mol}^{-1}$$

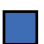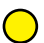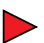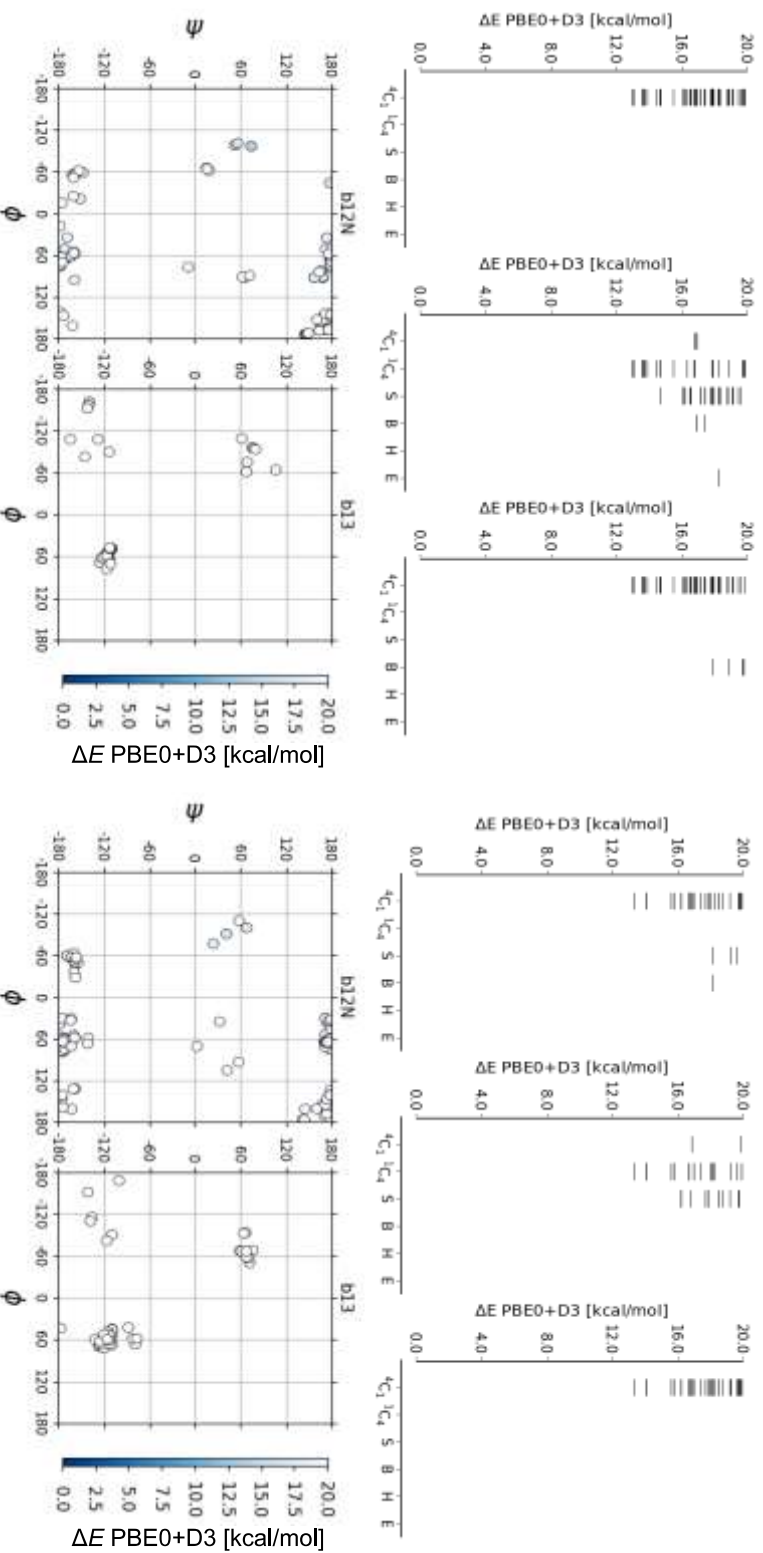

**Figure S14:** (Top) A comparison is made between the individual ring puckers of the  $\text{Gal}\beta(1 \rightarrow 3)\text{Fuca}\beta(1 \rightarrow 2)\text{GlcNAc}$  ions and their relative energy with respect to the lowest energy conformer of  $\text{Fuca}(\alpha(1 \rightarrow 6)\text{Gal}\beta(1 \rightarrow 3)\text{GlcNAc}\beta$  ions. The energy calculations were performed using the PBE0+D3/6-31+(d,p) level of theory. The left plot displays the  $\alpha$ -anomer, while the right plot shows the  $\beta$ -anomer. The top portion of each plot indicates the relative energy of the lowest energy conformer ( $\Delta E$ ), while the  $\Delta F$  value represents the free energy of the ions after higher level theory calculations. (Bottom) Distributions of the two glycosidic bonds angles between each monomer. The b13 corresponds to the bond between the GlcNAc and Gal, and b12 to the bond between Fuc and



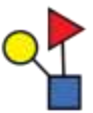

$\alpha$ -anomer

$$\Delta F = 4.5 \text{ kcal}\cdot\text{mol}^{-1}$$

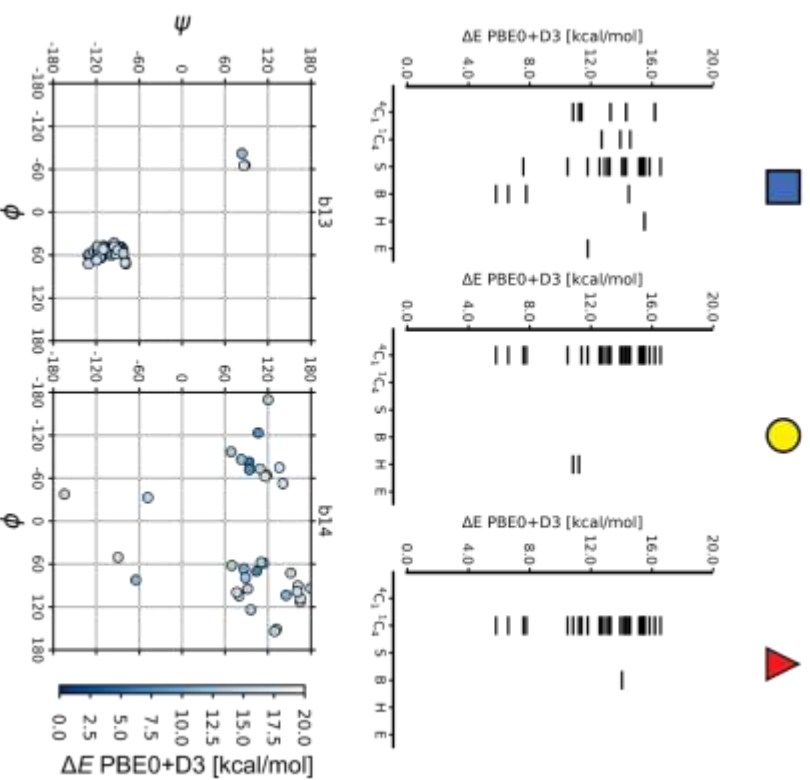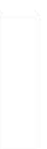

$\beta$ -anomer

$$\Delta F = 3.7 \text{ kcal}\cdot\text{mol}^{-1}$$

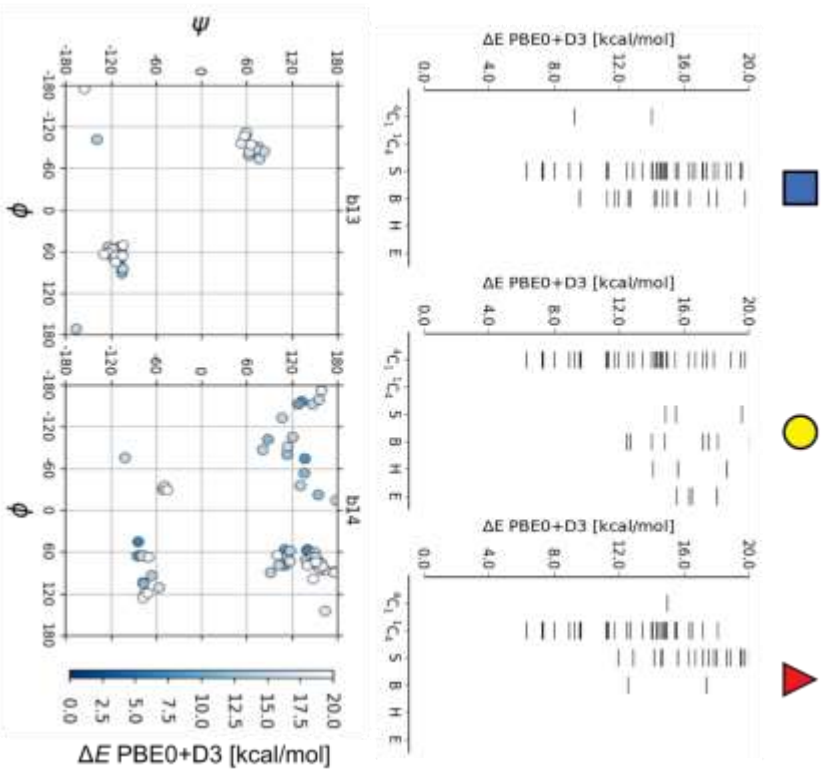

**Figure S15:** (Top) A comparison is made between the individual ring puckers of the **Gal $\beta$ (1  $\rightarrow$  3)**[Fuc $\beta$ (1  $\rightarrow$  4)]GlcNAc** ions and their relative energy with respect to the lowest energy conformer of **Fuc $\alpha$ (1  $\rightarrow$  6)**Gal $\beta$ (1  $\rightarrow$  3)**GlcNAc $\beta$**  ions. The energy calculations were performed using the PBE0+D3/6-31+(d,p) level of theory. The left plot displays the  $\alpha$ -anomer, while the right plot shows the  $\beta$ -anomer. The top portion of each plot indicates the relative energy of the lowest energy conformer ( $\Delta E$ ), while the  $\Delta F$  value represents the free energy of the ions after higher level theory calculations. (Bottom) Distributions of the two glycosidic bonds angles between each monomer. The b13 corresponds to the bond between the GlcNAc and Gal, and b14 to the bond between Fuc and******

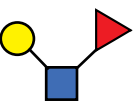

$\alpha$ -anomer

$$\Delta E = 4.6 \text{ kcal mol}^{-1}$$

$$\Delta F = 1.6 \text{ kcal mol}^{-1}$$

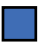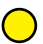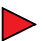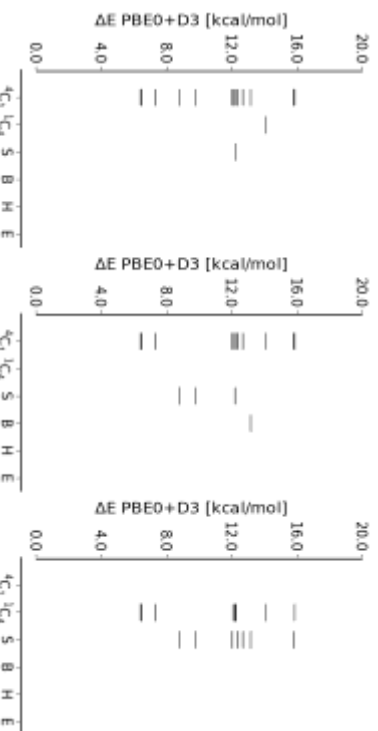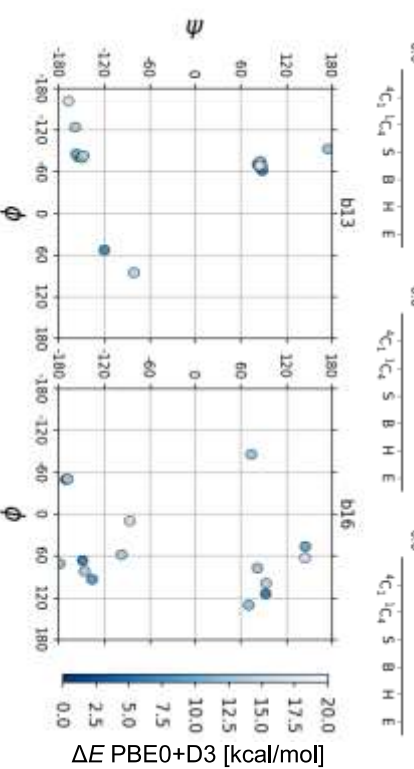

$\beta$ -anomer

$$\Delta E = 5.0 \text{ kcal mol}^{-1}$$

$$\Delta F = 0.5 \text{ kcal mol}^{-1}$$

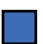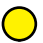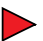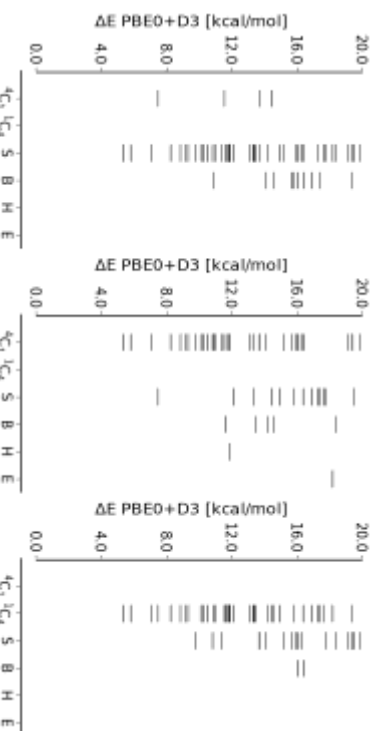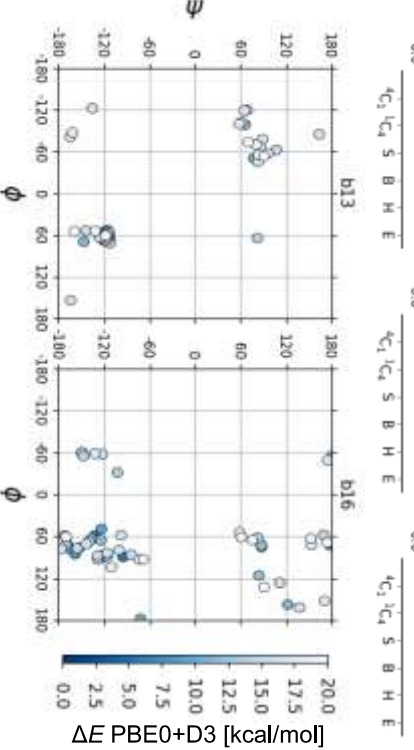

**Figure S16:** (Top) A comparison is made between the individual ring puckers of the Gal $\beta$ (1  $\rightarrow$  3)GlcNAc $\beta$  ions and their relative energy with respect to the lowest energy conformer of Fuca $\alpha$ (1  $\rightarrow$  6)Gal $\beta$ (1  $\rightarrow$  3)GlcNAc $\beta$  ions. The energy calculations were performed using the PBE0+D3/6-31+(d,p) level of theory. The left plot displays the  $\alpha$ -anomer, while the right plot shows the  $\beta$ -anomer. The top portion of each plot indicates the relative energy of the lowest energy conformer ( $\Delta E$ ), while the  $\Delta F$  value represents the free energy of the ions after higher level theory calculations. (Bottom) Distributions of the two glycosidic bonds angles between each monomer. The b13 corresponds to the bond between the GlcNAc and Gal, and b16 to the bond between Fuc and

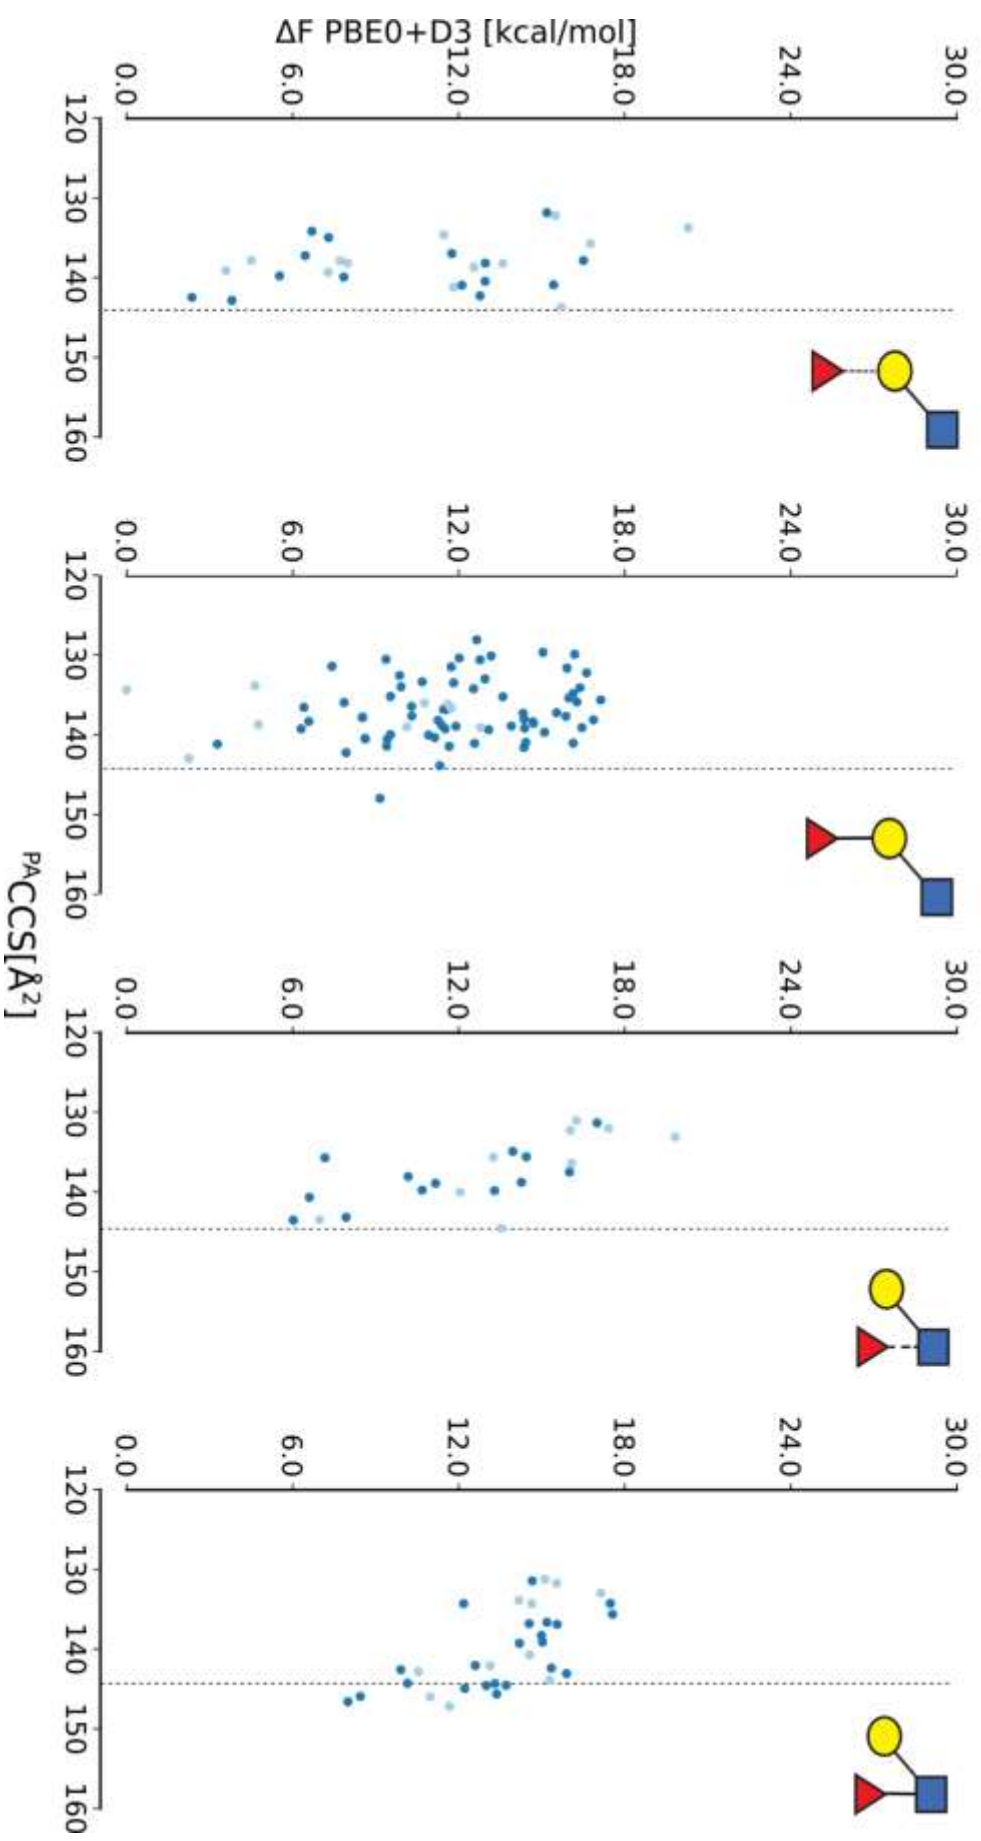

**Figure S17:** The  $P^A_{CCS}$  vs. relative free-energy in a larger 6-311+G(d,p) basis set, evaluated at 300 K of both anomers of ions of respectively: **Fuca(1 → 2)Gal(1 → 3)GlcNAc, Fuca(1 → 2)Gal(1 → 3)GlcNAc, Gal(1 → 3)GlcNAc, Gal(1 → 3)[Fuca(1 → 2)GlcNAc, Gal(1 → 3)Fuca(1 → 2)GlcNAc, Gal(1 → 3)Fuca(1 → 2)GlcNAc, Gal(1 → 6)Gal(1 → 3)GlcNAc** glycan. The glycan is shown using SNFG notation above the plots. The y-axis shows the free energy relatively to the lowest free energy conformer of the **Fuca(1 → 6)Gal(1 → 3)GlcNAc** ion. The dashed line represents the experimental  $P^A_{CCS}_{He}$ . The conformers highlighted with dark blue represent  $\alpha$  and light blue  $\beta$  anomers.

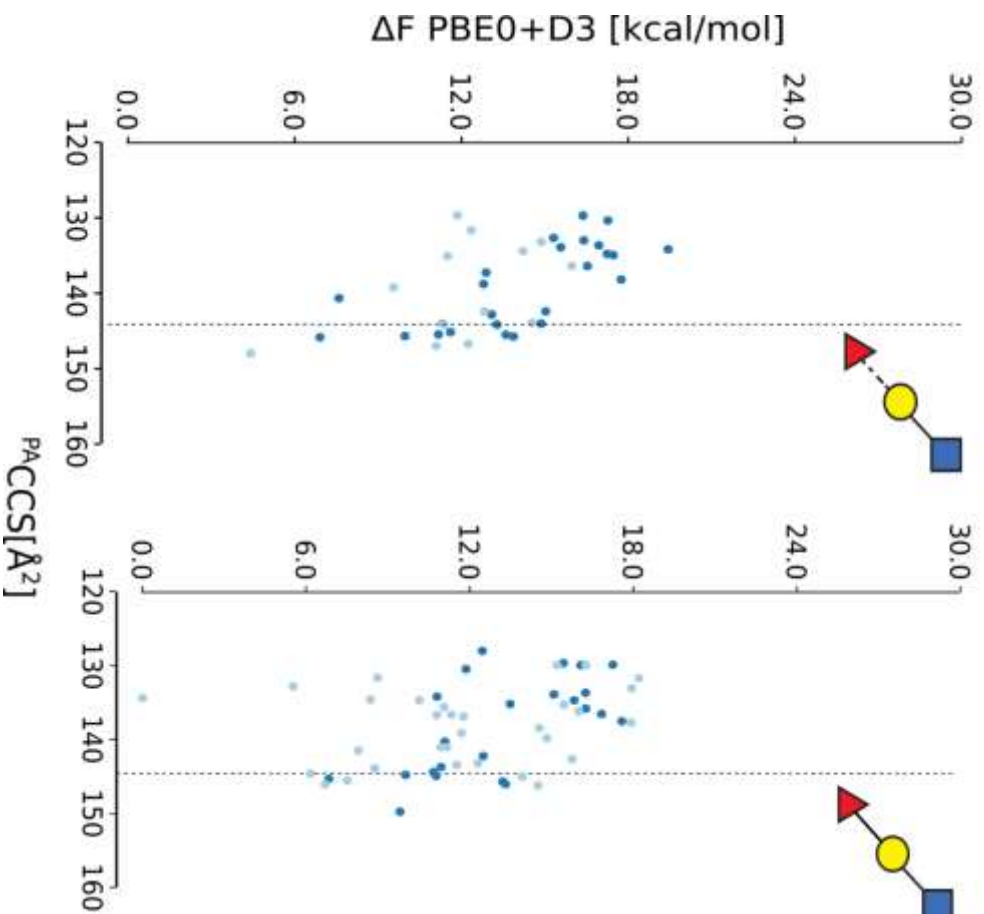

**Figure S18:** The  $P^A_{CCS}$  vs. relative free-energy in a larger 6-311+G(d,p) basis set, evaluated at 300 K of both anomers of ions of respectively: **Fuca(1** → **3)Gal(1** → **3)GlcNAc**, **Fuc(1** → **3)Gal(1** → **3)GlcNAc**., The glycan is shown using SNFG notation above the plots. The y-axis shows the free energy relatively to the lowest free energy conformer of the **Fuca(1** → **6)Gal(1** → **3)GlcNAc** ion. The dashed line represents the experimental  $P^T_{CCS_{He}}$ . The conformers highlighted with dark blue represent  $\alpha$  and light blue  $\beta$  anomers.

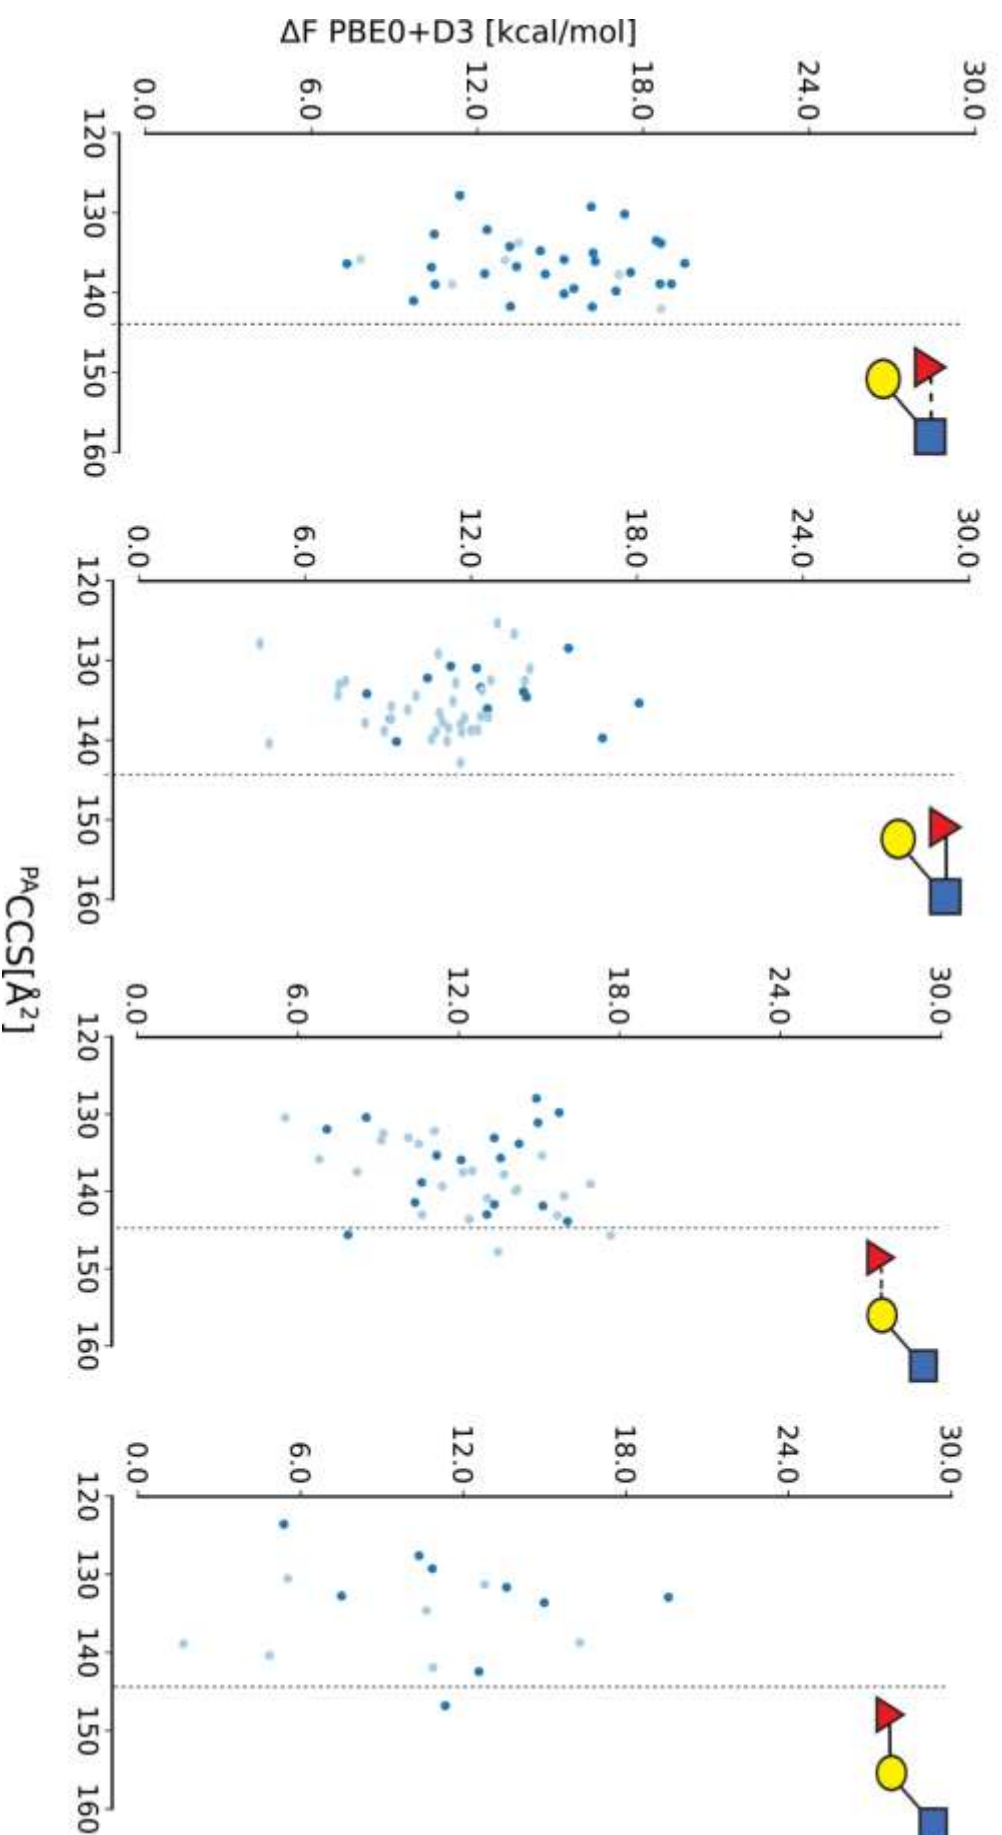

**Figure S19:** The  $P^A_{CCS}$  vs. relative free-energy in a larger 6-311+G(d,p) basis set, evaluated at 300 K of both anomers of ions of respectively: **Fuca(1**  $\rightarrow$  **4)Gal(1**  $\rightarrow$  **3)GlcNAc, Fuca(1**  $\rightarrow$  **4)Gal(1**  $\rightarrow$  **3)GlcNAc, Gal(1**  $\rightarrow$  **3)GlcNAc, Gal(1**  $\rightarrow$  **4)GlcNAc, Gal(1**  $\rightarrow$  **3)GlcNAc, Gal(1**  $\rightarrow$  **4)GlcNAc, Gal(1**  $\rightarrow$  **6)Gal(1**  $\rightarrow$  **3)GlcNAc** using SNFG notation above the plots. The y-axis shows the free energy relatively to the lowest free energy conformer of the **Fuca(1**  $\rightarrow$  **6)Gal(1**  $\rightarrow$  **3)GlcNAc** ion. The dashed line represents the experimental  $D^T_{CCS}^{He}$ . The conformers highlighted with dark blue represent  $\alpha$  and light blue  $\beta$  anomers.

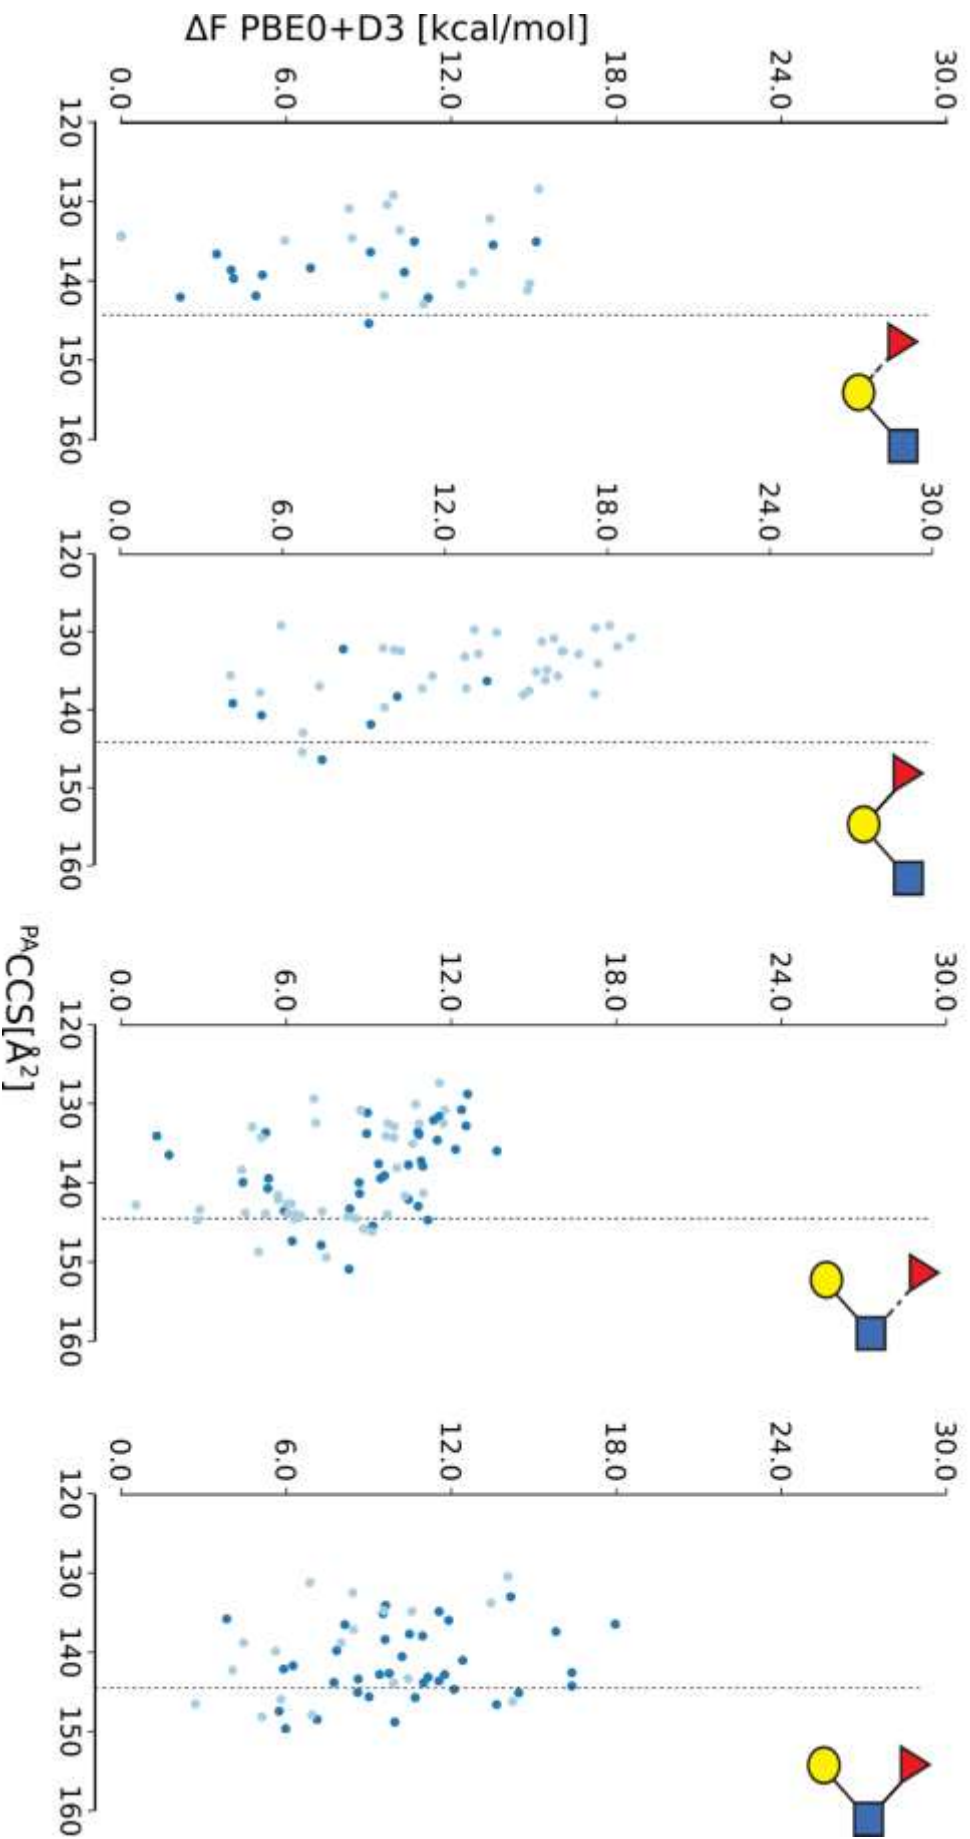

**Figure S20:** The  $P^A_{CCS}$  vs. relative free-energy in a larger 6-311+G(d,p) basis set, evaluated at 300 K of both anomers of ions of respectively: **Fuca(1** → **6)Galβ(1** → **3)GlcNAc, Fucβ(1** → **6)Galβ(1** → **3)GlcNAc, Galβ(1** → **3)GlcNAc, Galβ(1** → **4)Fuca(1** → **6)GlcNAc, Galβ(1** → **4)Fuca(1** → **6)GlcNAc**. The glycan is shown using SNFG notation above the plots. The y-axis shows the free energy relatively to the lowest free energy conformer of the **Fuca(1** → **6)Galβ(1** → **3)GlcNAcβ** ion. The dashed line represents the experimental  $P^T_{CCS_{He}}$ . The conformers highlighted with dark blue represent **α** and light blue **β** anomers.

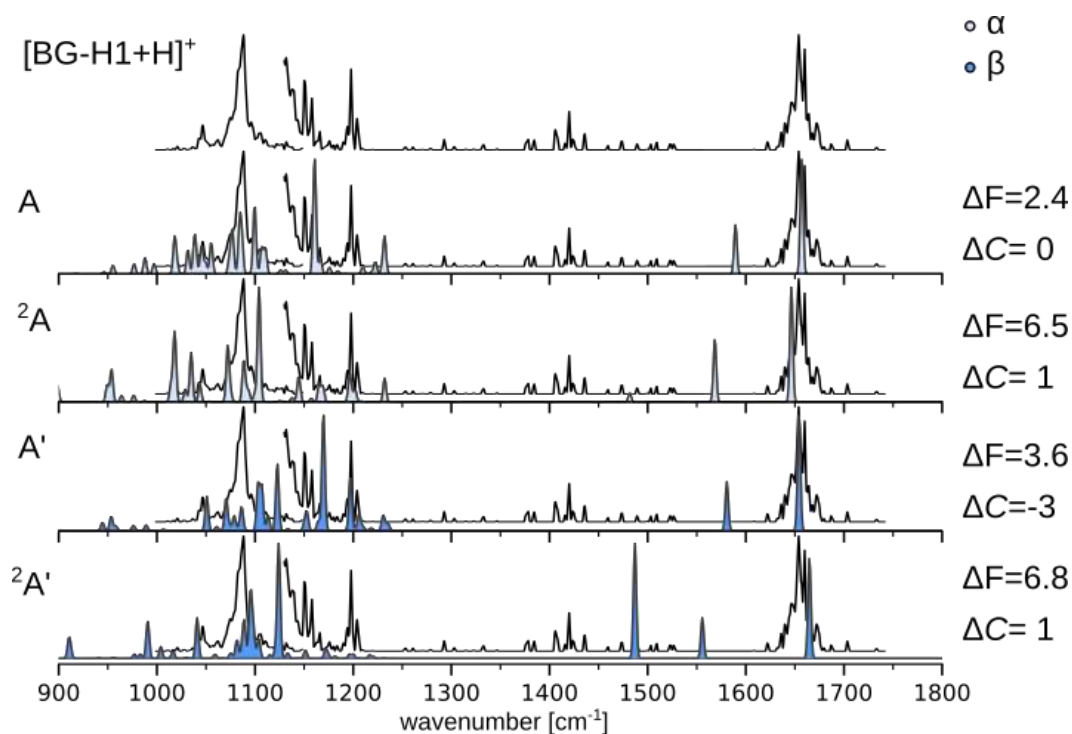

**Figure S21:** Simulated vibrational spectra of the lowest-free energy conformers of [BG-H1+H]<sup>+</sup> ions. (A) and (<sup>2</sup>A) represent the most stable and second most stable conformers of alpha anomers respectively. The (A') and (<sup>2</sup>A'), represent beta anomers of the same ions above. All spectra are compared to the experimental IR spectrum of [BG-H1+H]<sup>+</sup> (Top spectrum). The disconnected experimental line indicates two regions where a different laser power was used. The spectra between 1000-1250 cm<sup>-1</sup> is computed using anharmonic corrections, while the amide I band is calculated using harmonic vibrations.  $\Delta F$  indicates relative free energy with respect to the global minimum (in kcal mol<sup>-1</sup>), and  $\Delta C$  indicates a difference in CCS from experimental value of 144 Å<sup>2</sup>.

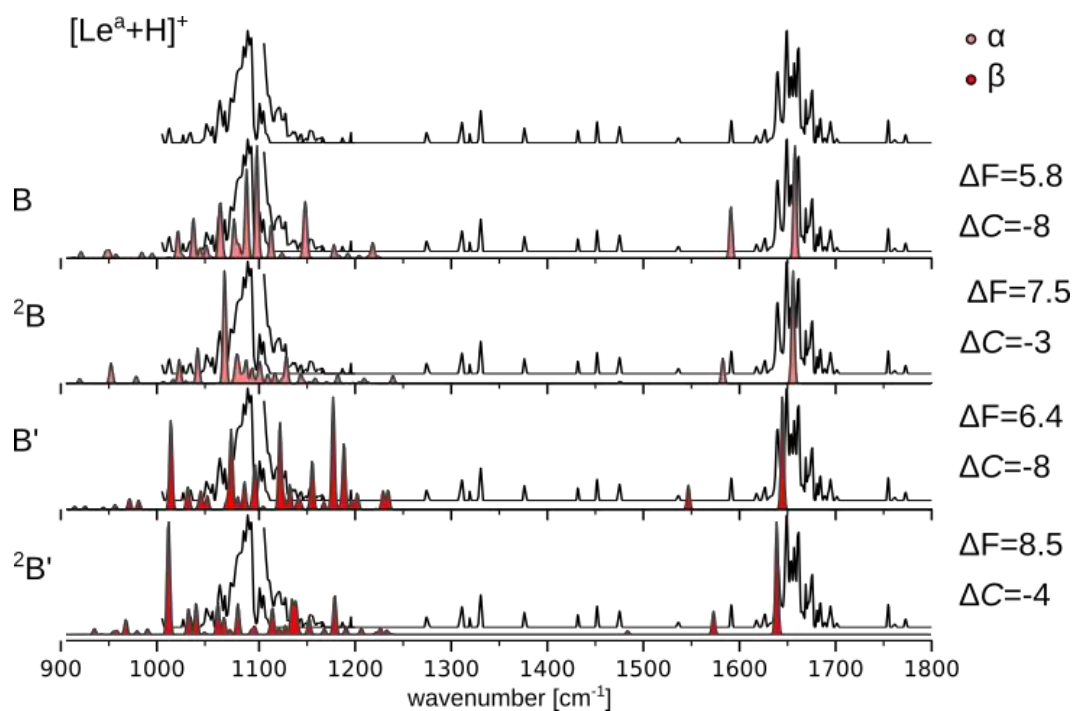

**Figure S22:** Simulated vibrational spectra of the lowest-free energy conformers of  $[Le^a+H]^+$  ions. (B) and ( $^2B$ ) represent the most stable and second most stable conformers of alpha anomers respectively. The (B') and ( $^2B'$ ) represent beta anomers of the ions following. All spectra are compared to the experimental IR spectrum of  $[Le^a+H]^+$  (Top spectrum). The disconnected experimental line indicates two regions where a different laser power was used. The spectra between 1000-1250  $cm^{-1}$  is computed using anharmonic corrections, while the amide I band is calculated using harmonic vibrations.  $\Delta F$  indicates relative free energy with respect to the global minimum (in kcal mol $^{-1}$ ), and  $\Delta C$  indicates a difference in CCS from experimental value of 144  $\text{\AA}^2$ .

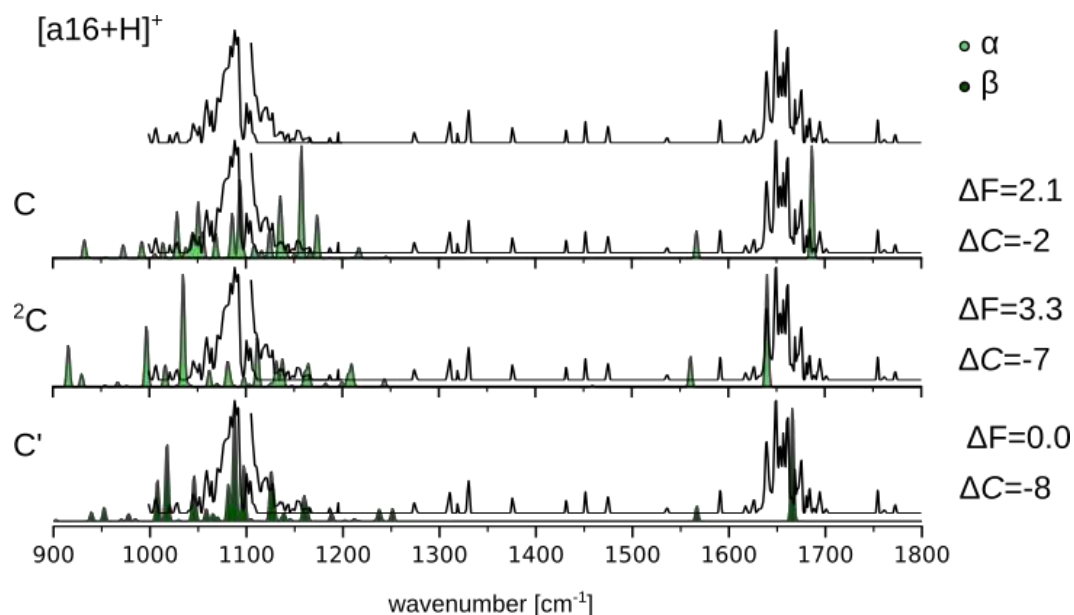

**Figure S23:** Simulated vibrational spectra of the lowest-free energy conformers of  $[a16+H]^+$  ions. (C) and ( $^2C$ ) represent the most stable and second most stable conformers of alpha anomers respectively. (C') represents the most stable beta anomers of the same ions above. All spectra are compared to the experimental IR spectrum of  $[a16+H]^+$  (Top spectrum). The disconnected experimental line indicates two regions where a different laser power was used. The spectra between 1000-1250  $cm^{-1}$  is computed using anharmonic corrections, while the amide I band is calculated using harmonic vibrations.  $\Delta F$  indicates relative free energy with respect to the global minimum (in kcal mol $^{-1}$ ), and  $\Delta C$  indicates a difference in CCS from experimental value of 144  $\text{\AA}^2$ .



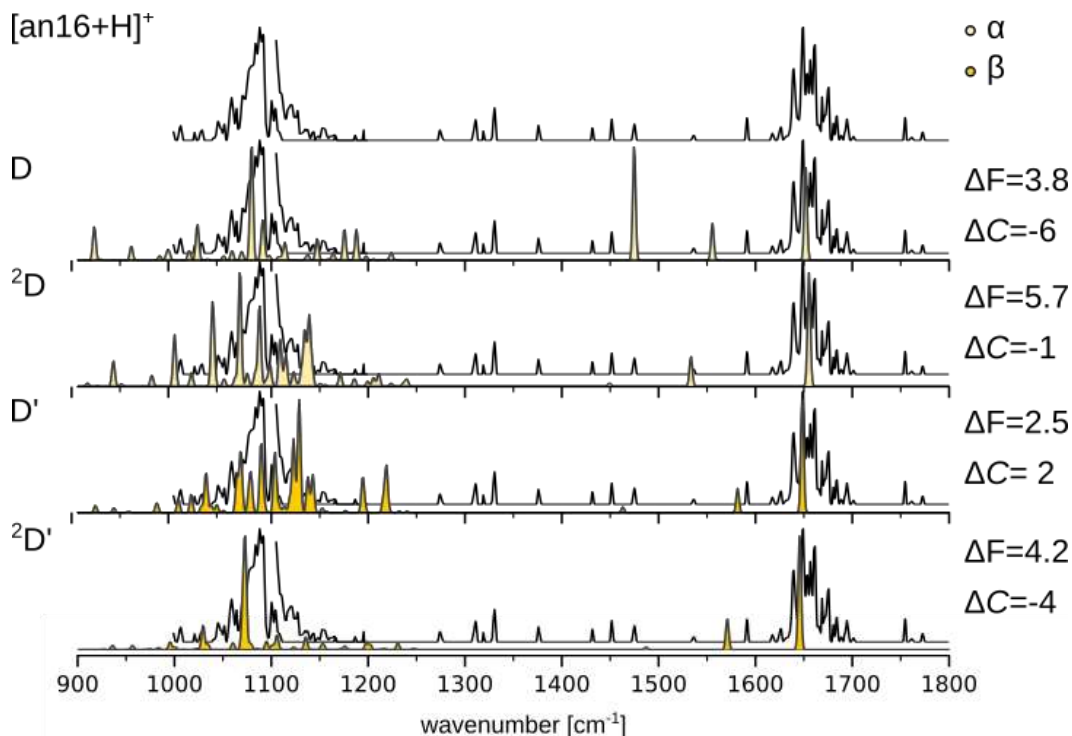

**Figure S24:** Simulated vibrational spectra of the lowest-free energy conformers of [an16+H]<sup>+</sup> ions. (D) and (<sup>2</sup>D) represent the most stable and second most stable conformers of alpha anomers respectively. (D') and (<sup>2</sup>D'), represent the most stable beta anomers of the same ion. All spectra are compared to the experimental IR spectrum of [Le<sup>a</sup>+H]<sup>+</sup> (Top spectrum). The disconnected experimental line indicates two regions where a different laser power was used. The spectra between 1000-1250 cm<sup>-1</sup> is computed using anharmonic corrections, while the amide I band is calculated using harmonic vibrations.  $\Delta F$  indicates relative free energy with respect to the global minimum (in kcal mol<sup>-1</sup>), and  $\Delta C$  indicates a difference in CCS from experimental value of 144 Å<sup>2</sup>.

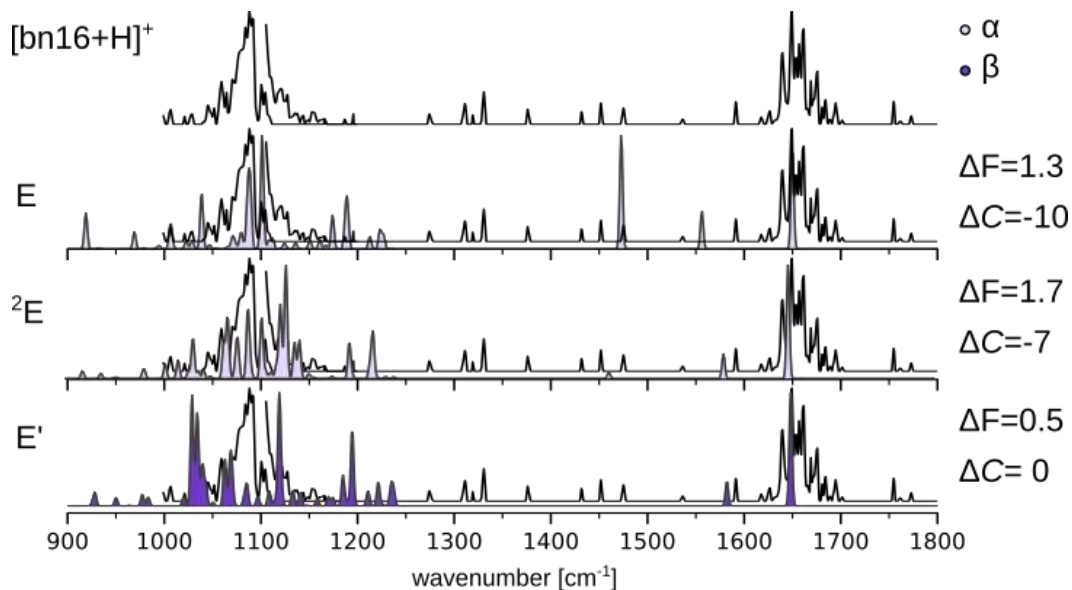

**Figure S25:** Simulated vibrational spectra of the lowest-free energy conformers of [bn16+H]<sup>+</sup> ions. (E) and (<sup>2</sup>E) represent the most stable and second most stable conformers of alpha anomers respectively. (E') represents the most stable beta anomer of the same ion. All spectra are compared to the experimental IR spectrum of [Le<sup>a</sup>+H]<sup>+</sup> (Top spectrum). The disconnected experimental line indicates two regions where a different laser power was used. The spectra between 1000-1250 cm<sup>-1</sup> is computed using anharmonic corrections, while the amide I band is calculated using harmonic vibrations.  $\Delta F$  indicates relative free energy with respect to the global minimum (in kcal mol<sup>-1</sup>), and  $\Delta C$  indicates a difference in CCS from experimental value of 144 Å<sup>2</sup>.

**Table S4:** Vibrational mode assignment of  $[\alpha\text{-BG-H1+H}]^+$  ion (A)

| Harmonic Vib | Anharmonic Vib | Intensity | Assignment                                                                                     |
|--------------|----------------|-----------|------------------------------------------------------------------------------------------------|
| 965.20       | 945.29         | 2.87E-03  | $\beta(\text{CCH}), \beta(\text{CCO})$                                                         |
| 972.76       | 948.69         | 4.91E-03  | $\beta(\text{CCH}), \beta(\text{CCO})$                                                         |
| 989.59       | 976.05         | 2.54E-02  | $\beta(\text{CCH}), \beta(\text{CCO})$                                                         |
| 997.63       | 985.25         | 8.75E-02  | vs(COC) in glycosidic linkage, $\beta(\text{COH})$                                             |
| 1004.80      | 984.95         | 2.98E-03  | vs(COC) in glycosidic linkage, $\beta(\text{COH})$                                             |
| 1018.50      | 1006.80        | 1.04E-01  | Bending H+ on Acetyl Oxygen                                                                    |
| 1032.83      | 1017.89        | 1.64E-01  | $\beta(\text{COH}), \nu(\text{CC})$                                                            |
| 1045.38      | 1027.10        | 1.04E-01  | $\nu(\text{CC}), \nu(\text{CO})$                                                               |
| 1047.55      | 1048.11        | 3.52E-01  | $\nu(\text{CO}), \nu(\text{CC}), \beta(\text{COH})$                                            |
| 1059.64      | 1050.72        | 7.18E-02  | $\nu(\text{CC}), \nu(\text{CO}), \beta(\text{COH})$                                            |
| 1069.27      | 1068.14        | 2.36E-01  | $\beta(\text{CH}_2)$                                                                           |
| 1073.48      | 1061.62        | 2.32E-01  | $\nu(\text{COC})$ in glycosidic linkage, $\beta(\text{CO}), \nu(\text{COH}), \beta(\text{CH})$ |
| 1088.65      | 1074.97        | 6.20E-02  | $\gamma(\text{CH}_2), \nu(\text{CC}), \nu(\text{CN})$                                          |
| 1094.01      | 1079.67        | 1.05E-01  | $\nu(\text{CC}), \nu(\text{CO}), \beta(\text{COH})$                                            |
| 1099.88      | 1085.34        | 2.95E-01  | $\nu(\text{CC}), \nu(\text{CO}), \beta(\text{COH})$                                            |
| 1106.83      | 1075.72        | 2.13E-01  | $\gamma(\text{CH}_2), \nu(\text{CC}), \nu(\text{CN})$                                          |
| 1110.24      | 1106.84        | 3.82E-01  | $\nu(\text{CO}),$ ring def.??                                                                  |
| 1119.63      | 1103.83        | 1.27E-01  | $\nu(\text{CC}), \nu(\text{CO})$                                                               |
| 1123.86      | 1108.14        | 1.77E-02  | $\nu(\text{CC}), \nu(\text{CO})$                                                               |
| 1128.38      | 1114.42        | 4.42E-01  | $\nu(\text{CC}), \nu(\text{CO}), \nu(\text{CC}), \beta(\text{COH})$                            |
| 1130.07      | 1116.76        | 1.21E-01  | $\nu(\text{COC})$ in glycosidic linkage, $\beta(\text{CO}), \nu(\text{COH}), \beta(\text{CH})$ |
| 1132.43      | 1116.41        | 1.33E-01  | $\beta(\text{CO}), \nu(\text{COH}), \beta(\text{CH})$                                          |
| 1138.24      | 1069.43        | 1.80E-01  | ???                                                                                            |
| 1146.81      | 1128.23        | 3.98E-03  | $\nu(\text{CC}), \nu(\text{CO}), \beta(\text{CH})$                                             |
| 1147.97      | 1129.58        | 6.16E-01  | $\nu(\text{CC}), \nu(\text{CO})$                                                               |
| 1152.85      | 1123.82        | 6.00E-03  | $\beta(\text{COH}), \nu(\text{CC})$                                                            |
| 1153.26      | 1136.80        | 2.31E-01  | $\beta(\text{COH}), \beta(\text{HC:CH}), \beta(\text{CC})$                                     |
| 1157.84      | 1140.54        | 2.28E-01  | $\beta(\text{COH}), \beta(\text{HC:CH}), \beta(\text{CC})$                                     |
| 1164.94      | 1156.18        | 3.54E-02  | $\nu(\text{CC}), \nu(\text{CO})$                                                               |
| 1166.85      | 1161.02        | 3.63E-02  | $\nu(\text{CC}), \nu(\text{CO})$                                                               |
| 1175.99      | 1154.45        | 3.86E-03  | $\beta(\text{CO}), \nu(\text{COH}), \beta(\text{CH})$                                          |
| 1187.51      | 1174.19        | 1.64E-03  | $\nu(\text{COC})$ in glycosidic linkage, $\beta(\text{CO}), \nu(\text{COH}), \beta(\text{CH})$ |
| 1204.24      | 1190.71        | 9.85E-01  | $\nu(\text{CC}), \nu(\text{CO})$                                                               |
| 1205.00      | 1238.87        | 1.86E-02  | $\beta(\text{COH})$                                                                            |
| 1212.49      | 1205.81        | 5.75E-02  | $\beta(\text{CO}), \nu(\text{COH}), \beta(\text{CH})$                                          |
| 1219.09      | 1196.57        | 1.39E-01  | $\nu(\text{CO}), \beta(\text{COH}), \beta(\text{CH})$                                          |
| 1220.15      | 1214.19        | 2.78E-02  | $\nu(\text{CO}), \beta(\text{COH}), \beta(\text{CH})$                                          |
| 1240.05      | 1225.19        | 3.93E-04  | $\nu(\text{CO}), \beta(\text{COH}), \beta(\text{CH})$                                          |
| 1245.72      | 1228.85        | 1.02E-03  | $\beta(\text{COH}), \beta(\text{CC})$                                                          |
| 1250.99      | 1240.20        | 4.29E-02  | $\beta(\text{COH}), \beta(\text{CC})$                                                          |
| 1254.11      | 1221.05        | 3.63E-03  | $\beta(\text{COH}), \tau(\text{CH}), \delta(\text{CC})$                                        |
| 1269.48      | 1249.16        | 5.98E-03  | $\beta(\text{COH}), \tau(\text{CH}_2)$                                                         |
| 1271.05      | 1248.03        | 1.28E-02  | $\beta(\text{COH}), \beta(\text{CH})$                                                          |
| 1275.44      | 1252.57        | 1.00E-01  | $\beta(\text{COH}), \beta(\text{CH})$                                                          |
| 1281.09      | 1262.01        | 2.95E-01  | $\beta(\text{COH}), \beta(\text{CH})$                                                          |
| 1291.68      | 1259.37        | 4.22E-02  | $\beta(\text{COH}), \beta(\text{CH})$                                                          |

$\nu$ -stretching, as-asymmetric, s-symmetric,  $\beta$ -in-plane bending,  $\gamma$ -out-of-plane bending,  $\delta$ -scissoring,  $\tau$ -twisting

**Table S5** Vibrational mode assignment of [ $\alpha$ -BG-H1+H]<sup>+</sup> ion (<sup>2</sup>A):

| Harmonic Vib | Anharmonic Vib | Intensity | Assignment                                                                                                   |
|--------------|----------------|-----------|--------------------------------------------------------------------------------------------------------------|
| 965.36       | 942.148        | 3.10E-04  | $\beta$ (CH <sub>2</sub> ), Bending H <sup>+</sup> on Acetyl Oxygen                                          |
| 973.13       | 940.3          | 6.40E-05  | Bending H <sup>+</sup> on Acetyl Oxygen, $\beta$ (CCH), $\beta$ (CCO)                                        |
| 984.62       | 970.503        | 1.45E-04  | $\beta$ (HCCH), $\beta$ (CH <sub>3</sub> )                                                                   |
| 999.17       | 985.593        | 5.57E-04  | $\beta$ (HCCH), $\beta$ (CH <sub>3</sub> )                                                                   |
| 1013.47      | 1006.56        | 2.23E-03  | Bending H <sup>+</sup> on Acetyl Oxygen, $\beta$ (CH <sub>3</sub> )                                          |
| 1023.06      | 1019.76        | 1.88E-03  | $\tau$ (CH <sub>3</sub> ), Bending H <sup>+</sup> on Acetyl Oxygen                                           |
| 1023.55      | 1007.11        | 3.66E-03  | $\delta$ (HCCH), $\tau$ (CH <sub>3</sub> )                                                                   |
| 1040.58      | 1013.10        | 2.88E-03  | Bending H <sup>+</sup> on Acetyl Oxygen, $\beta$ (CH <sub>3</sub> ), $\delta$ (HCOH)                         |
| 1045.60      | 1020.69        | 7.53E-03  | Bending H <sup>+</sup> on Acetyl Oxygen, $\beta$ (CH <sub>3</sub> ), $\delta$ (HCOH)                         |
| 1055.23      | 1046.32        | 6.31E-04  | $\beta$ (CH <sub>3</sub> ), $\delta$ (HCOH), $\nu$ (CC), $\nu$ (CO)                                          |
| 1059.46      | 1033.97        | 2.22E-03  | Bending H <sup>+</sup> on Acetyl Oxygen, $\beta$ (CH <sub>3</sub> )                                          |
| 1071.80      | 1059.76        | 4.35E-04  | $\beta$ (CH <sub>3</sub> ), $\delta$ (HCOH), $\nu$ (CC), $\nu$ (CO)                                          |
| 1082.31      | 1070.89        | 6.12E-04  | $\delta$ (HCOH), $\nu$ (CC), $\nu$ (CO)                                                                      |
| 1090.62      | 1070.97        | 6.21E-04  | Bending H <sup>+</sup> on Acetyl Oxygen, $\beta$ (CH <sub>3</sub> ), $\delta$ (HCOH), $\nu$ (CC), $\nu$ (CO) |
| 1101.33      | 1090.10        | 1.26E-02  | $\delta$ (HCOH), $\delta$ (HCCH), $\nu$ (CC), $\nu$ (CO)                                                     |
| 1102.15      | 1088.55        | 1.67E-04  | $\delta$ (HCOH), $\delta$ (HCCH), $\nu$ (CC), $\nu$ (H <sub>2</sub> C:OH)                                    |
| 1110.36      | 1096.83        | 8.83E-04  | $\delta$ (HCOH), $\nu$ (CN), $\nu$ (CO), $\tau$ (CH <sub>3</sub> )                                           |
| 1117.41      | 1106.86        | 4.24E-05  | Bending H <sup>+</sup> on Acetyl Oxygen, $\delta$ (HCOH), $\nu$ (CN), $\nu$ (CO), $\tau$ (CH <sub>3</sub> )  |
| 1117.84      | 1104.98        | 9.40E-04  | Bending H <sup>+</sup> on Acetyl Oxygen, $\delta$ (HCOH), $\nu$ (CO), $\tau$ (CH <sub>3</sub> )              |
| 1125.56      | 1111.54        | 1.01E-03  | vas(COC) in glycosidic linkage, vas(COC), $\nu$ (CO), $\delta$ (HCCH), $\beta$ (CO)                          |
| 1129.03      | 1117.31        | 3.81E-04  | $\beta$ (CH <sub>3</sub> ), $\delta$ (HCCH), $\delta$ (HCOH)                                                 |
| 1132.16      | 1119.34        | 2.60E-04  | vas(COC) in glycosidic linkage, $\delta$ (HCCH), $\delta$ (HCOH)                                             |
| 1138.40      | 1127.88        | 4.54E-04  | $\tau$ (HCCH), $\beta$ (CH <sub>2</sub> ), $\delta$ (HCOH)                                                   |
| 1141.08      | 1125.28        | 4.51E-04  | vas(COC) in glycosidic linkage, vas(COC), $\nu$ (CO), $\delta$ (HCCH), $\beta$ (CO)                          |
| 1146.22      | 1129.87        | 4.30E-05  | vas(COC) in glycosidic linkage, vas(COC), $\nu$ (CO), $\nu$ (CC)                                             |
| 1149.50      | 1133.89        | 1.63E-06  | $\nu$ (COC) in glycosidic linkage, $\nu$ (CO), $\delta$ (HCOH), $\delta$ (HCCH)                              |
| 1158.59      | 1145.23        | 2.10E-04  | $\nu$ (CO), $\nu$ (CC), $\delta$ (HCOH)                                                                      |
| 1163.62      | 1163.24        | 1.89E-04  | $\tau$ (HCCH), $\beta$ (CH <sub>2</sub> ), $\delta$ (HCOH)                                                   |
| 1168.58      | 1150.46        | 1.96E-04  | $\tau$ (HCCH), $\beta$ (CH <sub>2</sub> ), $\delta$ (HCOH), $\nu$ (CO)                                       |
| 1173.39      | 1154.01        | 5.99E-05  | $\delta$ (HCOH), $\nu$ (CO), vas(COC), $\nu$ (CN)                                                            |
| 1175.46      | 1151.77        | 1.29E-05  | $\delta$ (HCOH), $\nu$ (CO), $\nu$ (CCC), $\tau$ (CH <sub>2</sub> )                                          |
| 1179.41      | 1155.86        | 9.36E-04  | $\delta$ (HCOH), $\nu$ (CO), vas(COC), $\nu$ (CCC)                                                           |
| 1188.24      | 1173.67        | 2.54E-03  | vas(COC) in glycosidic linkage, vas(COC), $\nu$ (CO), $\delta$ (HCCH), $\beta$ (CH <sub>3</sub> )            |
| 1197.23      | 1181.40        | 9.29E-05  | vas(COC) in glycosidic linkage, $\delta$ (HCCH), $\delta$ (HCOH)                                             |
| 1209.08      | 1201.93        | 1.44E-04  | $\delta$ (HCCH), $\delta$ (HCOH)                                                                             |
| 1213.33      | 1204.42        | 4.71E-05  | vas(COC) in glycosidic linkage, $\delta$ (HCCH), $\delta$ (HCOH)                                             |
| 1221.75      | 1211.33        | 1.29E-04  | $\delta$ (HCCH), $\delta$ (HCOH), $\beta$ (CH <sub>3</sub> )                                                 |
| 1240.15      | 1226.32        | 5.23E-04  | $\delta$ (HCCH), $\delta$ (HCOH), $\tau$ (CH <sub>2</sub> )                                                  |
| 1242.60      | 1230.08        | 5.61E-04  | $\delta$ (HCCH), $\delta$ (HCOH), $\tau$ (CH <sub>2</sub> )                                                  |
| 1250.23      | 1235.96        | 4.79E-03  | $\delta$ (HCCH), $\delta$ (HCOH), $\tau$ (CH <sub>2</sub> )                                                  |
| 1258.41      | 1228.81        | 9.43E-04  | $\delta$ (HCCH), $\delta$ (HCOH), $\tau$ (CH <sub>2</sub> )                                                  |
| 1265.36      | 1247.23        | 1.51E-03  | $\delta$ (HCOH), $\delta$ (HCNH), $\tau$ (CH <sub>2</sub> )                                                  |
| 1273.73      | 1246.21        | 1.39E-04  | $\delta$ (HCCH), $\delta$ (HCOH), $\tau$ (CH <sub>2</sub> )                                                  |
| 1278.84      | 1250.58        | 4.45E-04  | $\delta$ (HCCH), $\delta$ (HCOH)                                                                             |
| 1289.77      | 1261.18        | 4.55E-03  | $\delta$ (HCCH), $\delta$ (HCOH), $\delta$ (HCNH)                                                            |
| 1304.21      | 1269.34        | 2.49E-04  | $\delta$ (HCCH), $\delta$ (HCOH), $\tau$ (CH <sub>2</sub> )                                                  |

$\nu$ -stretching, as-asymmetric, s-symmetric,  $\beta$ -in-plane bending,  $\gamma$ -out-of-plane bending,  $\delta$ -scissoring,  $\tau$ -twisting

**Table S6:** Vibrational mode assignment of [ $\beta$ -BG-H1+H]<sup>+</sup> ion (A<sup>+</sup>):

| Harmonic Vib | Anharmonic Vib | Intensity | Assignment                                                            |
|--------------|----------------|-----------|-----------------------------------------------------------------------|
| 966.63       | 915.28         | 4.33E-03  | $\beta$ (CCH), $\beta$ (CCO), $\beta$ (CNH)                           |
| 975.60       | 931.39         | 2.43E-03  | $\beta$ (CCH), $\beta$ (CCO), $\beta$ (CNH)                           |
| 989.48       | 974.55         | 8.12E-02  | $\beta$ (CCH), $\beta$ (CCO)                                          |
| 998.13       | 983.43         | 1.45E-01  | vs(COC) in glycosidic linkage, $\beta$ (COH)                          |
| 1009.84      | 987.99         | 4.55E-02  | vs(COC) in glycosidic linkage, $\beta$ (COH)                          |
| 1019.68      | 1006.09        | 4.79E-02  | $\beta$ (CO), $\beta$ (CH)                                            |
| 1033.85      | 1019.02        | 5.19E-02  | $\beta$ (CO), $\beta$ (CH)                                            |
| 1041.27      | 1036.61        | 9.54E-03  | $\beta$ (CO), $\beta$ (CH)                                            |
| 1045.44      | 1025.39        | 6.73E-02  | $\nu$ (CO), $\nu$ (CC), $\beta$ (COH)                                 |
| 1059.48      | 1043.80        | 1.29E-01  | $\beta$ (CO), $\beta$ (CH)                                            |
| 1069.76      | 1062.56        | 3.23E-01  | $\tau$ (CH <sub>2</sub> )                                             |
| 1070.53      | 1059.20        | 5.70E-01  | $\tau$ (CH <sub>2</sub> ), $\beta$ (CCO), $\nu$ (CO)                  |
| 1089.59      | 1075.38        | 3.51E-02  | $\nu$ (CN), $\beta$ (CCH), $\beta$ (CCO), $\gamma$ (CH <sub>2</sub> ) |
| 1093.89      | 1077.32        | 1.22E-01  | vas(COC) in glycosidic linkage, $\beta$ (COH)                         |
| 1100.88      | 1084.79        | 6.84E-01  | $\beta$ (CCH), $\beta$ (CCO), $\gamma$ (CH <sub>2</sub> ), $\nu$ (CN) |
| 1110.39      | 1090.94        | 1.47E-02  | $\nu$ (CC), $\beta$ (CO), $\beta$ (CH)                                |
| 1111.27      | 1100.57        | 2.99E-01  | vs(COC) in glycosidic linkage, $\beta$ (COH), $\beta$ (CH)            |
| 1112.91      | 1104.33        | 4.15E-02  | vs(COC) in glycosidic linkage, $\beta$ (COH), $\beta$ (CH)            |
| 1125.02      | 1108.80        | 1.31E-01  | $\beta$ (CO), $\beta$ (CH)                                            |
| 1128.86      | 1115.63        | 1.10E-02  | $\beta$ (CO), $\beta$ (CH)                                            |
| 1129.72      | 1116.45        | 8.39E-02  | $\beta$ (CO), $\beta$ (CH)                                            |
| 1130.37      | 1115.48        | 6.37E-02  | $\nu$ (CC), $\beta$ (CO), $\beta$ (CH)                                |
| 1139.07      | 1112.52        | 1.30E-02  | $\beta$ (CO), $\beta$ (CH)                                            |
| 1145.26      | 1116.90        | 7.04E-02  | $\nu$ (CO), $\beta$ (CO), $\tau$ (CH <sub>2</sub> )                   |
| 1150.75      | 1133.09        | 3.96E-01  | $\nu$ (CO), $\beta$ (CO)                                              |
| 1152.97      | 1134.96        | 4.53E-02  | $\beta$ (CO), $\beta$ (CH)                                            |
| 1157.28      | 1136.91        | 3.78E-01  | $\beta$ (CO), $\beta$ (CH)                                            |
| 1161.23      | 1080.84        | 3.17E-01  | Bending H+ on Acetyl Oxygen                                           |
| 1165.73      | 1143.32        | 1.33E-01  | $\nu$ (CC), $\beta$ (CO), $\beta$ (CH)                                |
| 1175.21      | 1152.74        | 5.84E-01  | $\nu$ (CO), $\beta$ (CO)                                              |
| 1180.59      | 1163.32        | 1.32E-02  | $\nu$ (CC), $\beta$ (CO), $\beta$ (CH)                                |
| 1192.03      | 1180.82        | 7.70E-02  | vas(COC) in glycosidic linkage, $\beta$ (COH), $\beta$ (CH)           |
| 1198.94      | 1183.00        | 1.35E-01  | vas(COC) in glycosidic linkage, $\beta$ (COH), $\beta$ (CH)           |
| 1208.44      | 1199.68        | 9.85E-01  | Bending H+ on Acetyl Oxygen, $\nu$ (CO), $\beta$ (CO)                 |
| 1211.21      | 1194.50        | 7.75E-02  | $\beta$ (CO), $\beta$ (CH)                                            |
| 1215.49      | 1227.21        | 4.27E-01  | $\beta$ (CO), $\beta$ (CH)                                            |
| 1236.94      | 1224.03        | 8.42E-04  | $\beta$ (CO), $\beta$ (CH)                                            |
| 1247.04      | 1239.19        | 2.27E-02  | $\beta$ (CO), $\beta$ (CH)                                            |
| 1249.05      | 1231.88        | 1.09E-02  | $\beta$ (CO), $\beta$ (CH)                                            |
| 1252.66      | 1236.01        | 1.34E-01  | $\beta$ (CO), $\beta$ (CH)                                            |
| 1253.98      | 1225.58        | 1.16E-03  | $\beta$ (CO), $\tau$ (CH <sub>2</sub> )                               |
| 1271.97      | 1241.07        | 1.09E-02  | $\beta$ (CO), $\beta$ (CH)                                            |
| 1274.59      | 1248.28        | 1.98E-02  | $\beta$ (CO), $\tau$ (CH <sub>2</sub> ), $\beta$ (CH)                 |
| 1283.39      | 1262.25        | 3.37E-02  | $\beta$ (CO), $\tau$ (CH <sub>2</sub> ), $\beta$ (CH)                 |
| 1290.01      | 1260.39        | 1.04E-01  | $\beta$ (CO), $\tau$ (CH <sub>2</sub> ), $\beta$ (CH)                 |
| 1301.49      | 1265.62        | 5.28E-02  | $\beta$ (CO), $\beta$ (CH)                                            |

$\nu$ -stretching, as-asymmetric, s-symmetric,  $\beta$ -in-plane bending,  $\gamma$ -out-of-plane bending,  $\delta$ -scissoring,  $\tau$ -twisting

**Table S7:** Vibrational mode assignment of [ $\beta$ -BG-H1+H]<sup>+</sup> (<sup>2</sup>A'):

| Harmonic Vib | Anharmonic Vib | Intensity | Assignment                                                                                                            |
|--------------|----------------|-----------|-----------------------------------------------------------------------------------------------------------------------|
| 985.27       | 928.78         | 1.03E-03  | $\beta$ (NH)                                                                                                          |
| 989.22       | 965.42         | 5.26E-05  | $\beta$ (NH), $\beta$ (HCCH)                                                                                          |
| 1000.90      | 979.40         | 3.07E-03  | $\beta$ (NH), $\beta$ (HCCH), $\beta$ (HCOH)                                                                          |
| 1005.75      | 983.78         | 1.53E-04  | $\beta$ (NH), $\beta$ (HCCH), $\beta$ (HCOH)                                                                          |
| 1016.18      | 994.03         | 4.28E-04  | Bending H <sup>+</sup> on Acetyl Oxygen, $\delta$ (HCOH), $\nu$ (CO)                                                  |
| 1019.28      | 1006.41        | 2.27E-03  | $\beta$ (CH <sub>3</sub> ), $\beta$ (HCCH)                                                                            |
| 1026.69      | 1017.27        | 3.88E-04  | $\tau$ (CH <sub>3</sub> )                                                                                             |
| 1052.54      | 1030.46        | 5.43E-04  | $\tau$ (CH <sub>3</sub> ), $\beta$ (OH)                                                                               |
| 1059.92      | 1047.52        | 2.48E-03  | $\tau$ (CH <sub>3</sub> ), $\beta$ (OH), $\nu$ (CO)                                                                   |
| 1063.35      | 1051.98        | 4.41E-04  | $\tau$ (CH <sub>3</sub> ), $\beta$ (OH), $\nu$ (CO)                                                                   |
| 1069.10      | 1048.31        | 3.84E-03  | $\tau$ (CH <sub>3</sub> ), $\beta$ (OH), $\nu$ (CO)                                                                   |
| 1071.26      | 1058.93        | 5.25E-05  | $\beta$ (CH <sub>3</sub> ), $\beta$ (NH)                                                                              |
| 1079.81      | 1058.60        | 2.97E-05  | $\tau$ (CH <sub>3</sub> ), $\beta$ (OH), $\nu$ (CO), $\nu$ (CN)                                                       |
| 1086.64      | 1064.92        | 4.82E-05  | Bending H <sup>+</sup> on Acetyl Oxygen, $\tau$ (CH <sub>3</sub> ), $\beta$ (OH), $\nu$ (CO)                          |
| 1088.69      | 1044.34        | 2.39E-04  | Bending H <sup>+</sup> on Acetyl Oxygen, $\tau$ (CH <sub>3</sub> ), $\beta$ (OH)                                      |
| 1095.04      | 1073.78        | 6.34E-04  | Bending H <sup>+</sup> on Acetyl Oxygen, $\tau$ (CH <sub>3</sub> ), $\tau$ (CH <sub>2</sub> ), $\beta$ (OH)           |
| 1102.04      | 1083.23        | 8.66E-04  | Bending H <sup>+</sup> on Acetyl Oxygen, $\tau$ (CH <sub>3</sub> ), $\tau$ (CH <sub>2</sub> ), $\beta$ (OH)           |
| 1119.58      | 1102.12        | 5.63E-06  | $\tau$ (CH <sub>2</sub> ), $\beta$ (OH), $\beta$ (HCCH)                                                               |
| 1122.47      | 1103.85        | 2.00E-04  | Bending H <sup>+</sup> on Acetyl Oxygen, $\tau$ (CH <sub>2</sub> ), $\beta$ (OH)                                      |
| 1125.35      | 1105.30        | 9.96E-04  | Bending H <sup>+</sup> Acetyl Oxygen, $\tau$ (CH <sub>3</sub> ), $\tau$ (CH <sub>2</sub> ), $\beta$ (OH), $\nu$ (COC) |
| 1134.12      | 1118.47        | 8.09E-04  | $\beta$ (CH <sub>2</sub> ), $\beta$ (HCCH)                                                                            |
| 1135.81      | 1121.16        | 2.71E-04  | $\beta$ (OH), $\beta$ (HCCH)                                                                                          |
| 1140.64      | 1123.53        | 1.37E-03  | $\tau$ (CH <sub>3</sub> ), $\beta$ (OH), $\beta$ (HCCH)                                                               |
| 1145.32      | 1133.73        | 6.29E-04  | $\tau$ (CH <sub>2</sub> ), $\beta$ (OH), $\beta$ (HCCH)                                                               |
| 1148.92      | 1129.74        | 1.32E-05  | $\tau$ (CH <sub>2</sub> ), $\beta$ (OH), $\beta$ (HCCH)                                                               |
| 1151.28      | 1134.25        | 5.72E-05  | $\tau$ (CH <sub>2</sub> ), $\beta$ (OH), $\beta$ (HCCH)                                                               |
| 1169.02      | 1154.96        | 2.06E-06  | $\tau$ (CH <sub>3</sub> ), $\beta$ (OH), $\beta$ (HCCH)                                                               |
| 1169.86      | 1154.76        | 1.12E-06  | $\tau$ (CH <sub>3</sub> ), $\beta$ (OH), $\beta$ (HCCH)                                                               |
| 1171.53      | 1159.33        | 1.18E-04  | $\beta$ (OH), $\beta$ (HCCH)                                                                                          |
| 1178.86      | 1167.69        | 1.07E-03  | $\tau$ (CH <sub>2</sub> ), $\beta$ (OH)                                                                               |
| 1184.52      | 1173.71        | 1.44E-06  | $\tau$ (CH <sub>2</sub> ), $\beta$ (OH)                                                                               |
| 1188.90      | 1175.04        | 1.10E-03  | $\tau$ (CH <sub>3</sub> ), $\beta$ (OH), $\beta$ (HCCH), $\nu$ (CC)                                                   |
| 1192.87      | 1179.59        | 2.69E-05  | $\tau$ (CH <sub>3</sub> ), $\beta$ (OH), $\beta$ (HCCH)                                                               |
| 1202.65      | 1187.32        | 1.11E-03  | $\beta$ (NH), $\beta$ (HCCH), $\beta$ (OH)                                                                            |
| 1210.92      | 1195.30        | 2.07E-03  | $\nu$ (COC) in glycosidic linkage, $\beta$ (NH), $\beta$ (HCCH), $\beta$ (OH)                                         |
| 1216.14      | 1199.17        | 4.13E-04  | $\tau$ (CH <sub>2</sub> ), $\beta$ (OH), $\beta$ (HCCH)                                                               |
| 1234.50      | 1228.59        | 4.31E-04  | $\beta$ (OH), $\beta$ (HCCH)                                                                                          |
| 1241.53      | 1226.37        | 9.92E-05  | $\beta$ (OH), $\beta$ (HCCH)                                                                                          |
| 1247.37      | 1231.95        | 4.34E-05  | $\tau$ (CH <sub>2</sub> ), $\beta$ (OH), $\beta$ (HCCH)                                                               |
| 1254.09      | 1245.21        | 1.13E-03  | $\beta$ (OH), $\beta$ (HCOH)                                                                                          |
| 1255.27      | 1238.13        | 3.64E-07  | $\beta$ (OH), $\beta$ (HCCH)                                                                                          |
| 1259.78      | 1236.83        | 3.10E-03  | $\beta$ (OH), $\beta$ (HCCH)                                                                                          |
| 1274.56      | 1242.36        | 6.17E-04  | $\tau$ (CH <sub>2</sub> ), $\beta$ (OH), $\beta$ (HCCH)                                                               |
| 1282.76      | 1261.10        | 1.37E-04  | $\beta$ (OH), $\beta$ (HCOH)                                                                                          |
| 1294.15      | 1262.11        | 2.87E-03  | $\beta$ (OH), $\beta$ (HCOH)                                                                                          |
| 1296.25      | 1259.35        | 1.03E-03  | $\beta$ (OH), $\beta$ (HCOH)                                                                                          |

$\nu$ -stretching, as-asymmetric, s-symmetric,  $\beta$ -in-plane bending,  $\gamma$ -out-of-plane bending,  $\delta$ -scissoring,  $\tau$ -twisting

**Table S8:** Vibrational mode assignment of [ $\alpha$ -Le<sup>a</sup>+H]<sup>+</sup> ion (B):

| Harmonic Vib | Anharmonic Vib | Intensity | Assignment                                                                          |
|--------------|----------------|-----------|-------------------------------------------------------------------------------------|
| 958.75       | 937.12         | 1.16E-02  | $\beta$ (CO), $\beta$ (CH <sub>2</sub> ), $\beta$ (NH)                              |
| 971.43       | 944.60         | 6.61E-02  | $\beta$ (CO), $\beta$ (CH <sub>2</sub> ), $\beta$ (NH), $\nu$ (CO)                  |
| 984.97       | 974.00         | 7.45E-02  | $\beta$ (CH <sub>2</sub> ), $\nu$ s(COC) in glycosidic linkage                      |
| 986.16       | 970.65         | 6.77E-02  | $\beta$ (CH <sub>3</sub> ), $\nu$ (CO)                                              |
| 1000.97      | 980.94         | 4.06E-02  | $\beta$ (CH <sub>3</sub> ), $\nu$ s(COC) in glycosidic linkage, $\beta$ (NH)        |
| 1019.23      | 1008.01        | 5.59E-02  | $\delta$ (HCCH), $\nu$ (CO)                                                         |
| 1030.84      | 1018.68        | 4.67E-02  | $\beta$ (CH <sub>3</sub> ), $\beta$ (NH), Bending H+ on Acetyl Oxygen               |
| 1044.52      | 1050.11        | 3.12E-02  | $\beta$ (CH <sub>3</sub> ), Bending H+ on Acetyl Oxygen                             |
| 1054.71      | 1035.89        | 1.18E-02  | $\beta$ (CH <sub>3</sub> ), Bending H+ on Acetyl Oxygen, $\beta$ (CO)               |
| 1062.59      | 1045.54        | 2.46E-01  | $\beta$ (CH <sub>3</sub> ), Bending H+ on Acetyl Oxygen, $\beta$ (CO)               |
| 1071.07      | 1068.74        | 9.21E-02  | $\beta$ (CH <sub>3</sub> ), $\beta$ (NH)                                            |
| 1076.68      | 1061.68        | 3.48E-01  | $\beta$ (CH <sub>3</sub> ), $\beta$ (NH), Bending H+ on Acetyl Oxygen, $\beta$ (CO) |
| 1080.05      | 1063.47        | 1.29E-03  | $\delta$ (HCCH), $\nu$ (CO), $\beta$ (COH), $\beta$ (CH <sub>3</sub> )              |
| 1089.91      | 1075.13        | 1.12E-01  | $\beta$ (CH <sub>3</sub> ), Bending H+ on Acetyl Oxygen, $\nu$ (CC)                 |
| 1093.84      | 1079.89        | 1.69E-02  | $\nu$ (CO), $\beta$ (HCCH), $\beta$ (CO)                                            |
| 1104.26      | 1090.66        | 2.21E-01  | Bending H+ on Acetyl Oxygen, $\beta$ (CO)                                           |
| 1110.75      | 1093.27        | 4.76E-04  | Bending H+ on Acetyl Oxygen, $\beta$ (CO)                                           |
| 1117.51      | 1104.04        | 3.23E-01  | $\nu$ (CO), $\beta$ (CO)                                                            |
| 1120.21      | 1113.23        | 1.97E-02  | $\nu$ (CO), $\beta$ (CO)                                                            |
| 1124.20      | 1108.57        | 1.22E-01  | $\nu$ (CC), $\nu$ (CO)                                                              |
| 1125.71      | 1113.03        | 8.47E-03  | $\nu$ (CC), $\nu$ (CC), Bending H+ on Acetyl Oxygen                                 |
| 1134.93      | 1091.52        | 3.26E-02  | Bending H+ on Acetyl Oxygen                                                         |
| 1135.79      | 1116.99        | 7.21E-01  | $\beta$ (CO)                                                                        |
| 1141.30      | 1088.83        | 3.27E-01  | Bending H+ on Acetyl Oxygen, $\beta$ (CO)                                           |
| 1144.76      | 1127.78        | 9.06E-01  | $\nu$ (CC), $\nu$ (CO)                                                              |
| 1149.40      | 1132.26        | 8.78E-03  | $\nu$ (CC), $\nu$ (CO)                                                              |
| 1150.35      | 1128.61        | 8.17E-03  | $\nu$ (CO), $\tau$ (CH <sub>2</sub> ), Bending H+ on Acetyl Oxygen                  |
| 1160.90      | 1142.52        | 2.76E-01  | $\beta$ (CO), $\tau$ (CH <sub>2</sub> ), $\delta$ (HCOH)                            |
| 1168.76      | 1153.76        | 4.42E-02  | $\beta$ (CO), $\tau$ (CH <sub>2</sub> ), $\delta$ (HCOH), $\nu$ (CO)                |
| 1175.21      | 1156.98        | 2.55E-03  | $\nu$ s(COC) in glycosidic linkage, $\nu$ (CC)                                      |
| 1179.99      | 1160.37        | 6.07E-03  | $\beta$ (CH <sub>3</sub> ), $\beta$ (CO), $\nu$ s(COC) in glycosidic linkage        |
| 1191.64      | 1177.03        | 2.55E-01  | $\beta$ (CH <sub>3</sub> ), $\beta$ (CO), $\nu$ s(COC) in glycosidic linkage        |
| 1198.51      | 1183.72        | 4.69E-03  | $\nu$ (CC), $\nu$ (CO), $\beta$ (CH <sub>3</sub> )                                  |
| 1202.00      | 1178.94        | 2.80E-01  | $\nu$ s(COC) in glycosidic linkage, $\beta$ (HCCH)                                  |
| 1224.48      | 1212.94        | 2.43E-02  | $\beta$ (CO), $\beta$ (HCCH)                                                        |
| 1227.49      | 1207.98        | 1.04E-01  | $\beta$ (CO), $\tau$ (CH <sub>2</sub> ), $\nu$ (CO)                                 |
| 1239.00      | 1222.36        | 3.82E-02  | $\beta$ (CO), $\tau$ (CH <sub>2</sub> ), $\nu$ (CO)                                 |
| 1239.54      | 1224.76        | 1.40E-03  | $\beta$ (CO)                                                                        |
| 1245.77      | 1221.12        | 2.57E-04  | $\beta$ (CO), $\beta$ (HCCH), $\tau$ (CH <sub>2</sub> )                             |
| 1252.56      | 1243.77        | 1.95E-02  | $\nu$ (CO), $\tau$ (CH <sub>2</sub> )                                               |
| 1259.20      | 1234.14        | 2.25E-02  | $\beta$ (CO), $\tau$ (CH <sub>2</sub> )                                             |
| 1262.86      | 1247.80        | 5.22E-02  | $\beta$ (CO)                                                                        |
| 1272.19      | 1253.13        | 7.91E-03  | $\beta$ (CO), $\tau$ (CH <sub>2</sub> )                                             |
| 1281.02      | 1254.38        | 9.80E-03  | $\beta$ (CO), $\tau$ (CH <sub>2</sub> )                                             |
| 1283.77      | 1248.62        | 6.83E-02  | $\delta$ (HCOH)                                                                     |
| 1288.64      | 1273.81        | 4.17E-04  | $\beta$ (CO), $\beta$ (HCCH)                                                        |

$\nu$ -stretching, as-asymmetric, s-symmetric,  $\beta$ -in-plane bending,  $\gamma$ -out-of-plane bending,  $\delta$ -scissoring,  $\tau$ -twisting

**Table S9:** Vibrational mode assignment of [ $\alpha$ -Le<sup>a</sup>+H]<sup>+</sup> (B<sup>1</sup>):

| Harmonic Vib | Anharmonic Vib | Intensity | Assignment                                                                                         |
|--------------|----------------|-----------|----------------------------------------------------------------------------------------------------|
| 963.121      | 899.649        | 2.33E-02  | $\beta$ (CO), $\beta$ (CH <sub>2</sub> )                                                           |
| 966.858      | 944.343        | 1.01E-02  | Bending H+ on Acetyl Oxygen, $\beta$ (HCOH)                                                        |
| 976.096      | 919.302        | 4.50E-03  | Bending H+ on Acetyl Oxygen, $\beta$ (HCOH)                                                        |
| 990.368      | 954.618        | 3.17E-02  | $\beta$ (HCCH), $\beta$ (CO), $\beta$ (CH <sub>3</sub> )                                           |
| 992.234      | 976.535        | 3.54E-02  | $\beta$ (HCCH), $\beta$ (CO)                                                                       |
| 1017.299     | 977.476        | 2.75E-02  | $\beta$ (HCCH), $\beta$ (CO), vs(COC) in glycosidic linkage                                        |
| 1032.224     | 1003.245       | 1.40E-02  | $\beta$ (CH <sub>3</sub> ), $\beta$ (CO)                                                           |
| 1048.925     | 1031.464       | 2.03E-02  | $\beta$ (CH <sub>3</sub> ), $\beta$ (HCCH), $\beta$ (CH <sub>3</sub> ), $\beta$ (CH <sub>2</sub> ) |
| 1057.257     | 1041.69        | 4.86E-02  | $\beta$ (CH <sub>3</sub> ), $\beta$ (CO), $\nu$ (CC), $\beta$ (CH <sub>2</sub> )                   |
| 1064.891     | 1048.044       | 7.70E-03  | $\beta$ (CH <sub>3</sub> )                                                                         |
| 1066.109     | 1069.899       | 1.14E-02  | $\beta$ (CH <sub>3</sub> ), $\beta$ (CO), $\nu$ (CC)                                               |
| 1070.73      | 1060.182       | 1.62E-02  | vs(COC), $\delta$ (HCCH), $\beta$ (CH <sub>3</sub> )                                               |
| 1084.191     | 1054.922       | 5.86E-02  | vs(COC), vas(COC), $\delta$ (HCCH), $\beta$ (CH <sub>3</sub> )                                     |
| 1097.038     | 1067.22        | 3.18E-02  | $\beta$ (CH <sub>3</sub> ), $\beta$ (CO), $\nu$ (CC), $\nu$ (CO)                                   |
| 1102.104     | 1088.22        | 8.24E-03  | $\beta$ (CO), $\nu$ (CC), $\nu$ (CO)                                                               |
| 1109.919     | 1095.262       | 1.03E-01  | $\beta$ (CO), $\beta$ (CH <sub>2</sub> ), vas(COC) in glycosidic linkage                           |
| 1113.694     | 1105.118       | 1.68E-02  | $\beta$ (HCCH), $\nu$ (CC), $\nu$ (CO)                                                             |
| 1114.663     | 1107.297       | 4.31E-02  | $\beta$ (HCCH), $\nu$ (CC), $\beta$ (CH <sub>3</sub> )                                             |
| 1117.185     | 1109.503       | 4.13E-02  | $\beta$ (HCOH), $\nu$ (CC), $\beta$ (HCCH)                                                         |
| 1123.339     | 1113.618       | 2.86E-02  | $\beta$ (HCCH), $\nu$ (CO), $\beta$ (CH <sub>2</sub> )                                             |
| 1129.458     | 1117.633       | 4.71E-02  | $\beta$ (HCCH), $\nu$ (CO), $\beta$ (CH <sub>2</sub> )                                             |
| 1139.58      | 1123.788       | 3.79E-02  | vas(COC) in glycosidic linkage, vas(COC), $\beta$ (HCCH)                                           |
| 1144.665     | 1129.108       | 2.16E-02  | $\nu$ (CC), $\beta$ (HCCH)                                                                         |
| 1148.197     | 1132.106       | 4.38E-02  | $\nu$ (CC), $\nu$ (CO), $\beta$ (HCCH)                                                             |
| 1155.456     | 1138.428       | 1.10E-02  | $\nu$ (CC), $\nu$ (CO), $\beta$ (CH <sub>2</sub> )                                                 |
| 1158.947     | 1140.292       | 2.79E-02  | $\nu$ (CC), $\nu$ (CO), $\beta$ (CH <sub>2</sub> )                                                 |
| 1162.674     | 1147.601       | 3.14E-02  | Bending H+ on Acetyl Oxygen, $\nu$ (CC), $\nu$ (CO)                                                |
| 1169.168     | 1154.735       | 2.16E-02  | $\beta$ (HCOH), $\tau$ (CH <sub>2</sub> )                                                          |
| 1178.089     | 1159.305       | 4.82E-02  | $\beta$ (HCCH), $\nu$ (CC)                                                                         |
| 1180.209     | 1160.704       | 1.46E-02  | $\nu$ (CC), $\beta$ (CH <sub>3</sub> )                                                             |
| 1190.309     | 1174.31        | 2.88E-02  | $\beta$ (CH <sub>3</sub> ), $\beta$ (HCCH), $\nu$ (CC)                                             |
| 1194.331     | 1177.606       | 1.52E-02  | vas(COC) in glycosidic linkage, vas(COC), $\beta$ (HCOH)                                           |
| 1199.017     | 1183.569       | 1.29E-02  | vas(COC) in glycosidic linkage, $\beta$ (HCCH)                                                     |
| 1205.566     | 1189.46        | 2.19E-02  | vas(COC) in glycosidic linkage, $\beta$ (HCCH)                                                     |
| 1215.353     | 1201.285       | 1.22E-02  | $\beta$ (HCCH), $\beta$ (HCOH)                                                                     |
| 1222.887     | 1212.97        | 2.74E-02  | $\beta$ (HCCH), $\beta$ (HCOH), $\beta$ (CH <sub>2</sub> )                                         |
| 1238.306     | 1222.21        | 7.12E-03  | $\beta$ (HCCH), $\beta$ (HCOH), $\beta$ (CH <sub>2</sub> )                                         |
| 1240.22      | 1228.762       | 8.69E-03  | $\beta$ (HCCH), $\beta$ (HCOH)                                                                     |
| 1249.65      | 1240.452       | 2.12E-02  | $\beta$ (HCCH), $\beta$ (HCOH), $\beta$ (CH <sub>3</sub> )                                         |
| 1257.279     | 1235.347       | 1.15E-02  | $\beta$ (HCCH), $\beta$ (HCOH)                                                                     |
| 1264.456     | 1244.898       | 1.03E-02  | $\beta$ (HCCH), $\beta$ (HCOH)                                                                     |
| 1277.466     | 1253.372       | 1.42E-03  | $\beta$ (HCCH), $\beta$ (HCOH), $\beta$ (CH <sub>2</sub> )                                         |
| 1281.368     | 1250.226       | 5.50E-03  | $\beta$ (HCOH), $\beta$ (CH <sub>2</sub> )                                                         |
| 1286.588     | 1270.706       | 1.55E-02  | $\beta$ (HCCH), $\beta$ (HCOH), $\beta$ (CH <sub>3</sub> )                                         |
| 1301.259     | 1270.204       | 2.06E-02  | $\beta$ (HCCH), $\beta$ (HCOH)                                                                     |

$\nu$ -stretching, as-asymmetric, s-symmetric,  $\beta$ -in-plane bending,  $\gamma$ -out-of-plane bending,  $\delta$ -scissoring,  $\tau$ -twisting

**Table S10: Vibrational mode assignment of  $[\beta\text{-Le}^a\text{+H}]^+$  ion (B')**

| Harmonic Vib | Anharmonic Vib | Intensity | Assignment                                                                                   |
|--------------|----------------|-----------|----------------------------------------------------------------------------------------------|
| 973.65       | 948.94         | 3.65E-02  | $\beta(\text{CO}), \beta(\text{CH}_2)$                                                       |
| 982.05       | 967.85         | 2.51E-02  | $\beta(\text{CH}_3), \beta(\text{CO}), \nu(\text{CC})$                                       |
| 992.595      | 938.06         | 3.49E-02  | Bending H+ on Acetyl Oxygen, $\beta(\text{HCOH})$                                            |
| 997.051      | 980.02         | 4.29E-02  | $\beta(\text{HCCH}), \beta(\text{CO}), \beta(\text{CH}_2)$                                   |
| 1002.091     | 980.49         | 6.80E-03  | $\beta(\text{HCCH}), \beta(\text{CO}), \beta(\text{CH}_2)$                                   |
| 1019.572     | 1004.59        | 9.27E-02  | $\beta(\text{CH}_3), \beta(\text{CO})$                                                       |
| 1025.619     | 1026.37        | 4.67E-03  | $\beta(\text{CH}_3), \delta(\text{HCCH})$                                                    |
| 1036.645     | 995.18         | 1.07E-01  | $\beta(\text{CH}_3), \beta(\text{CO})$                                                       |
| 1050.108     | 1038.27        | 6.00E-01  | $\beta(\text{CH}_3), \beta(\text{CO}), \nu(\text{CC})$                                       |
| 1052.948     | 1038.18        | 2.42E-01  | $\beta(\text{CH}_3), \beta(\text{CO}), \nu(\text{CC}), \nu(\text{CO})$                       |
| 1067.258     | 1055.66        | 1.91E-01  | $\beta(\text{CH}_3), \beta(\text{CO})$                                                       |
| 1071.226     | 1057.67        | 3.91E-02  | $\beta(\text{CH}_3), \beta(\text{CO})$                                                       |
| 1072.102     | 1066.01        | 1.87E-02  | $\beta(\text{CH}_3)$                                                                         |
| 1082.2       | 1069.14        | 1.50E-01  | $\beta(\text{CH}_3), \beta(\text{CO}), \nu(\text{CO}), \nu(\text{CO})$ in glycosidic linkage |
| 1087.621     | 1071.00        | 4.11E-02  | $\beta(\text{CH}_3)$ , Bending H+ on Acetyl Oxygen, $\nu(\text{CC})$                         |
| 1093.566     | 1076.18        | 1.27E-01  | $\nu(\text{CC}), \nu(\text{CO}), \beta(\text{CO})$                                           |
| 1107.163     | 1096.15        | 6.91E-02  | $\nu(\text{CC}), \nu(\text{CO}), \beta(\text{CO})$                                           |
| 1114.063     | 1099.27        | 1.11E-01  | $\nu(\text{CC}), \nu(\text{CO}), \beta(\text{CO})$                                           |
| 1118.298     | 1101.15        | 6.53E-01  | $\nu(\text{CC}), \nu(\text{CO}), \beta(\text{CO})$                                           |
| 1124.132     | 1114.92        | 7.43E-02  | $\beta(\text{CH}_3), \beta(\text{CO})$                                                       |
| 1124.624     | 1114.85        | 1.69E-01  | $\nu(\text{CO}), \beta(\text{CO}), \beta(\text{CH}_3)$                                       |
| 1128.909     | 1107.88        | 1.13E-01  | $\nu(\text{CO}), \beta(\text{CO})$                                                           |
| 1135.695     | 1122.53        | 6.06E-02  | $\nu(\text{CC}), \nu(\text{CO}), \beta(\text{CO})$                                           |
| 1138.917     | 1125.97        | 1.29E-02  | $\nu(\text{CO}), \beta(\text{CO}), \beta(\text{CH}_3), \nu(\text{CC})$                       |
| 1145.28      | 1125.70        | 1.70E-01  | $\nu(\text{CC}), \nu(\text{CO}), \beta(\text{CO})$                                           |
| 1146.522     | 1125.54        | 2.09E-01  | Bending H+ on Acetyl Oxygen, $\nu(\text{CC})$                                                |
| 1153.025     | 1134.19        | 2.89E-02  | $\nu(\text{CO}), \beta(\text{CO}), \beta(\text{CH}_2)$                                       |
| 1162.964     | 1155.78        | 9.97E-02  | $\beta(\text{CH}_3), \beta(\text{CO})$                                                       |
| 1164.947     | 1162.15        | 2.09E-01  | $\beta(\text{CH}_3), \beta(\text{CO})$                                                       |
| 1168.378     | 1151.77        | 7.37E-01  | $\beta(\text{CH}_2), \beta(\text{CO}), \nu(\text{CC})$                                       |
| 1187.468     | 1170.18        | 7.96E-02  | $\beta(\text{CH}_3), \beta(\text{CO}), \nu(\text{CO})$                                       |
| 1193.929     | 1173.12        | 5.91E-02  | $\nu(\text{CO}), \beta(\text{CO}), \beta(\text{CH}_2)$                                       |
| 1197.559     | 1182.37        | 2.05E-02  | $\nu(\text{CO})$ in glycosidic linkage, $\beta(\text{CO}), \beta(\text{CH}_3)$               |
| 1208.065     | 1185.40        | 4.03E-01  | $\beta(\text{CH}_3), \beta(\text{CO}), \nu(\text{CC})$                                       |
| 1218.062     | 1207.12        | 9.06E-01  | $\nu(\text{CO}), \beta(\text{CO}), \beta(\text{CH}_2)$                                       |
| 1221.366     | 1213.41        | 2.85E-02  | $\beta(\text{CO}), \beta(\text{CH}_3), \beta(\text{CH}_2)$                                   |
| 1221.901     | 1218.35        | 5.37E-01  | $\beta(\text{CO}), \beta(\text{CH}_2)$                                                       |
| 1231.663     | 1197.53        | 6.37E-02  | $\nu(\text{CC}), \beta(\text{CO})$                                                           |
| 1236.218     | 1222.75        | 5.85E-05  | $\beta(\text{CO}), \beta(\text{CH}_2)$                                                       |
| 1247.209     | 1226.16        | 7.75E-02  | $\beta(\text{CO}), \beta(\text{CH}_3)$                                                       |
| 1253.624     | 1233.63        | 4.79E-03  | $\beta(\text{CO}), \beta(\text{CH}_2), \nu(\text{CO})$                                       |
| 1257.268     | 1232.13        | 1.25E-01  | $\beta(\text{CO}), \beta(\text{CH}_2), \beta(\text{HCCH})$                                   |
| 1274.553     | 1251.62        | 7.80E-03  | $\beta(\text{CO}), \beta(\text{CH}_2), \beta(\text{HCCH})$                                   |
| 1291.243     | 1259.00        | 1.34E-01  | $\beta(\text{CO}), \beta(\text{CH}_2), \beta(\text{HCCH})$                                   |
| 1293.553     | 1260.37        | 1.51E-02  | $\beta(\text{CO}), \beta(\text{CH}_2)$                                                       |
| 1306.537     | 1264.31        | 1.51E-01  | $\beta(\text{CO}), \beta(\text{CH}_2), \beta(\text{HCCH})$                                   |

$\nu$ -stretching, as-asymmetric, s-symmetric,  $\beta$ -in-plane bending,  $\gamma$ -out-of-plane bending,  $\delta$ -scissoring,  $\tau$ -twisting



**Table S11: Vibrational mode assignment of  $[\beta\text{-Le}^{\alpha}\text{+H}]^{\alpha}$  ion ( ${}^2B'$ )**

| Harmonic Vib | Anharmonic Vib | Intensity | Assignment                                                                   |
|--------------|----------------|-----------|------------------------------------------------------------------------------|
| 970.849      | 959.573        | 2.62E-02  | $\beta(\text{HCCH}), \beta(\text{CH}_3)$                                     |
| 977.682      | 967.062        | 8.53E-03  | Bending H+ on Acetyl Oxygen, $\beta(\text{HCCH}), \beta(\text{CH}_3)$        |
| 992.018      | 979.366        | 1.89E-02  | $\beta(\text{HCCH})$                                                         |
| 997.87       | 982.909        | 2.10E-02  | $\beta(\text{HCCH})$                                                         |
| 1007.175     | 992.28         | 4.05E-02  | Bending H+ on Acetyl Oxygen, $\beta(\text{HCCH}), \beta(\text{CH}_3)$        |
| 1019.391     | 1003.862       | 2.04E-02  | $\beta(\text{HCCH}), \beta(\text{CH}_3)$                                     |
| 1023.694     | 1014.804       | 2.47E-02  | $\beta(\text{HCCH}), \beta(\text{CH}_3)$                                     |
| 1041.449     | 1036.668       | 1.05E-01  | $\beta(\text{CH}_2), \nu(\text{CC}), \beta(\text{CH}_3)$                     |
| 1049.704     | 1038.533       | 1.54E-02  | $\beta(\text{CH}_3)$                                                         |
| 1060.876     | 1036.032       | 3.16E-02  | $\beta(\text{CH}_2), \nu(\text{CC}), \beta(\text{CH}_3)$                     |
| 1070.613     | 1057.689       | 4.40E-02  | $\beta(\text{CH}_2), \nu(\text{CC}), \beta(\text{CH}_3)$                     |
| 1071.598     | 1065.364       | 5.63E-02  | $\tau(\text{CH}_3)$                                                          |
| 1083.037     | 1057.042       | 2.89E-02  | $\tau(\text{CH}_2), \beta(\text{HCCH})$                                      |
| 1088.282     | 1075.987       | 5.37E-03  | $\nu(\text{CO}), \beta(\text{CH}_3)$                                         |
| 1092.32      | 1074.008       | 1.49E-02  | $\nu(\text{CO}), \beta(\text{HCCH})$                                         |
| 1099.578     | 1094.361       | 4.16E-02  | $\nu(\text{CC}), \beta(\text{HCCH}), \beta(\text{HCOH})$                     |
| 1113.476     | 1066.727       | 8.84E-03  | Bending H+ on Acetyl Oxygen                                                  |
| 1116.065     | 1100.49        | 2.24E-02  | $\nu(\text{CO}), \beta(\text{HCCH}), \beta(\text{HCOH})$                     |
| 1119.631     | 1107.956       | 1.68E-02  | $\tau(\text{CH}_2), \beta(\text{HCCH}), \beta(\text{HCOH})$                  |
| 1123.74      | 1088.15        | 5.61E-02  | Bending H+ on Acetyl Oxygen, $\tau(\text{CH}_2)$                             |
| 1130.017     | 1108.976       | 5.25E-02  | $\tau(\text{CH}_2), \beta(\text{HCCH}), \beta(\text{HCOH})$                  |
| 1133.375     | 1122.877       | 2.02E-02  | $\tau(\text{CH}_3), \beta(\text{HCCH}), \beta(\text{HCOH})$                  |
| 1141.004     | 1124.037       | 6.40E-03  | $\tau(\text{CH}_2), \beta(\text{HCCH}), \beta(\text{HCOH})$                  |
| 1141.86      | 1126.436       | 2.78E-02  | $\tau(\text{CH}_2), \beta(\text{HCCH}), \beta(\text{HCOH})$                  |
| 1154.88      | 1141.93        | 7.37E-03  | $\tau(\text{CH}_2), \beta(\text{HCCH}), \beta(\text{HCOH})$                  |
| 1157.607     | 1144.962       | 4.85E-02  | $\tau(\text{CH}_3), \beta(\text{HCCH}), \beta(\text{HCOH})$                  |
| 1159.051     | 1142.707       | 2.12E-02  | $\beta(\text{HCCH}), \nu(\text{CO}), \nu(\text{CC})$                         |
| 1164.717     | 1158.079       | 2.91E-02  | $\beta(\text{HCOH}), \nu(\text{CO}), \nu(\text{CC})$                         |
| 1166.58      | 1151.631       | 2.50E-02  | $\beta(\text{HCCH}), \beta(\text{HCOH}), \beta(\text{CH}_3), \nu(\text{CN})$ |
| 1179.74      | 1165.165       | 5.68E-02  | $\beta(\text{HCCH}), \beta(\text{HCOH}), \beta(\text{CH}_3), \nu(\text{CO})$ |
| 1185.255     | 1169.088       | 5.34E-02  | $\nu(\text{as}(\text{COC}), \beta(\text{HCCH}), \beta(\text{CH}_3)$          |
| 1188.441     | 1171.374       | 2.11E-02  | $\nu(\text{CC}), \beta(\text{HCCH}), \beta(\text{CH}_3)$                     |
| 1200.98      | 1183.02        | 3.93E-02  | $\beta(\text{HCCH}), \beta(\text{HCOH}), \beta(\text{CH}_3), \nu(\text{CN})$ |
| 1211.219     | 1218.43        | 3.03E-03  | $\beta(\text{HCCH}), \beta(\text{HCOH})$                                     |
| 1215.915     | 1198.841       | 2.30E-02  | $\beta(\text{HCCH}), \beta(\text{HCOH}), \beta(\text{CH}_3)$                 |
| 1220.176     | 1210.361       | 1.11E-02  | $\tau(\text{CH}_2), \beta(\text{HCCH}), \beta(\text{HCOH})$                  |
| 1222.203     | 1211.034       | 9.68E-03  | $\beta(\text{CH}_2), \beta(\text{HCCH}), \beta(\text{HCOH})$                 |
| 1226.93      | 1209.565       | 5.82E-02  | $\tau(\text{CH}_2), \beta(\text{HCCH}), \beta(\text{HCOH})$                  |
| 1239.668     | 1221.362       | 2.56E-02  | $\beta(\text{HCOH})$                                                         |
| 1244.952     | 1236.229       | 6.51E-04  | $\tau(\text{CH}_2), \beta(\text{HCCH}), \beta(\text{HCOH})$                  |
| 1248.514     | 1237.255       | 2.36E-02  | $\beta(\text{HCCH}), \beta(\text{HCOH})$                                     |
| 1275.413     | 1252.762       | 1.49E-02  | $\tau(\text{CH}_2), \beta(\text{HCCH}), \beta(\text{HCOH})$                  |
| 1282.107     | 1248.806       | 2.90E-03  | $\tau(\text{CH}_2), \beta(\text{HCCH})$                                      |
| 1286.179     | 1263.725       | 1.95E-02  | $\beta(\text{HCCH}), \beta(\text{HCOH})$                                     |
| 1291.791     | 1267.498       | 9.63E-03  | $\tau(\text{CH}_2), \beta(\text{HCCH}), \beta(\text{HCOH})$                  |
| 1294.09      | 1257.312       | 2.39E-02  | $\tau(\text{CH}_2), \beta(\text{HCCH}), \beta(\text{HCOH})$                  |

$\nu$ -stretching, as—asymmetric, s-symmetric,  $\beta$ -in-plane bending,  $\gamma$ -out-of-plane bending,  $\delta$ -scissoring,  $\tau$ -twisting

**Table S12:** Vibrational mode assignment of [ $\alpha$ -a16+H]<sup>+</sup> ion (C):

| Harmonic Vib | Anharmonic Vib | Intensity | Assignment                                                       |
|--------------|----------------|-----------|------------------------------------------------------------------|
| 978.20       | 961.91         | 1.87E-01  | $\beta$ (CCH), $\beta$ (CCO)                                     |
| 997.16       | 966.51         | 5.77E-03  | $\beta$ (CCH), $\beta$ (CCO)                                     |
| 997.53       | 983.92         | 1.84E-02  | vs(COC) in glycosidic linkage, $\beta$ (COH)                     |
| 1017.24      | 1002.16        | 1.33E-01  | $\beta$ (CCH), $\beta$ (CCO)                                     |
| 1020.46      | 1034.78        | 4.94E-02  | $\beta$ (CCH), $\beta$ (CCO)                                     |
| 1026.23      | 966.78         | 8.81E-03  | Bending H+ on Acetyl Oxygen                                      |
| 1032.90      | 1021.46        | 1.65E-01  | $\beta$ (CCH), $\beta$ (CCO), v(CO)                              |
| 1054.46      | 1043.37        | 1.50E-01  | $\beta$ (CCH), $\beta$ (CCO), v(CO)                              |
| 1062.25      | 1057.52        | 3.68E-02  | $\beta$ (CCH), $\beta$ (CCO)                                     |
| 1069.71      | 1061.99        | 9.80E-03  | $\beta$ (CCH), $\beta$ (CCO)                                     |
| 1076.40      | 1058.02        | 3.88E-01  | $\beta$ (CCH), $\beta$ (CCO), v(CO)                              |
| 1078.51      | 1067.00        | 1.03E-01  | $\beta$ (CCH), $\beta$ (CCO)                                     |
| 1086.99      | 1071.57        | 9.06E-02  | vas(COC) in glycosidic linkage, $\beta$ (COH)                    |
| 1092.10      | 1074.36        | 2.15E-01  | vas(COC) in glycosidic linkage, $\beta$ (COH)                    |
| 1095.29      | 1084.97        | 1.79E-01  | $\beta$ (CCH), $\beta$ (CCO)                                     |
| 1102.64      | 1084.22        | 6.41E-02  | $\beta$ (CCH), $\beta$ (CCO), v(CO)                              |
| 1107.26      | 1079.89        | 5.00E-01  | v(CC), v(CO)                                                     |
| 1114.71      | 1098.09        | 2.21E-01  | $\beta$ (CCH), $\beta$ (CCO)                                     |
| 1123.10      | 1108.24        | 8.08E-03  | $\beta$ (CCH), $\beta$ (CCO)                                     |
| 1127.10      | 1115.24        | 3.87E-01  | $\beta$ (CCH), $\beta$ (CCO)                                     |
| 1129.75      | 1112.52        | 1.51E-02  | $\beta$ (CCH), $\beta$ (CCO)                                     |
| 1137.39      | 1123.05        | 6.31E-01  | v(CC), v(CO), $\beta$ (CO)                                       |
| 1139.42      | 1125.41        | 1.23E-01  | vas(CC), v(CO), $\beta$ (CO)                                     |
| 1142.40      | 1128.86        | 1.63E-02  | v(CO), $\beta$ (CCH)                                             |
| 1146.49      | 1145.67        | 7.15E-02  | v(CC), $\beta$ (CO)                                              |
| 1153.97      | 1137.61        | 1.02E-01  | $\beta$ (CCH), $\beta$ (CCO), $\gamma$ (CH <sub>2</sub> ), v(CN) |
| 1158.29      | 1140.11        | 4.18E-02  | $\beta$ (CCH), $\beta$ (CCO), $\gamma$ (CH <sub>2</sub> ), v(CN) |
| 1166.69      | 1154.04        | 2.45E-01  | $\beta$ (CCH), $\beta$ (CCO), $\gamma$ (CH <sub>2</sub> ), v(CN) |
| 1170.94      | 1155.94        | 2.05E-03  | vas(COC) in glycosidic linkage, v(CN), $\beta$ (CCH)             |
| 1177.57      | 1164.31        | 3.02E-01  | $\beta$ (CCO), v(CO)                                             |
| 1181.03      | 1165.79        | 2.76E-01  | $\beta$ (CCH), $\beta$ (CCO)                                     |
| 1193.00      | 1170.55        | 1.04E-01  | $\beta$ (CCH), vas(CO)                                           |
| 1193.65      | 1179.37        | 3.79E-02  | $\beta$ (CCH), $\beta$ (CCO)                                     |
| 1200.57      | 1186.86        | 9.06E-01  | $\beta$ (CCH), $\beta$ (CCO)                                     |
| 1208.33      | 1196.07        | 6.48E-02  | $\beta$ (CCH), $\beta$ (CCO)                                     |
| 1223.45      | 1203.25        | 3.49E-01  | $\gamma$ (CH <sub>2</sub> ), $\gamma$ (HC:OH)                    |
| 1235.13      | 1223.41        | 2.45E-03  | $\beta$ (COH), $\beta$ (CCH), vas(COC) in glycosidic linkage,    |
| 1242.23      | 1216.32        | 7.43E-03  | $\beta$ (CCH), $\beta$ (CCO)                                     |
| 1243.88      | 1234.20        | 2.18E-03  | $\beta$ (CCH), $\beta$ (CCO)                                     |
| 1254.56      | 1246.65        | 8.17E-02  | $\beta$ (CCH), $\beta$ (CCO)                                     |
| 1256.09      | 1274.54        | 1.87E-02  | $\beta$ (CCH), $\beta$ (CCO)                                     |
| 1261.46      | 1244.56        | 1.41E-02  | $\tau$ (CH <sub>2</sub> ), $\beta$ (CCH), $\beta$ (CCO)          |
| 1263.11      | 1242.36        | 8.31E-03  | $\tau$ (CH <sub>2</sub> ), $\beta$ (CCH), $\beta$ (CCO)          |
| 1269.00      | 1238.99        | 6.38E-03  | $\tau$ (CH <sub>2</sub> ), $\beta$ (CCH), $\beta$ (CCO)          |
| 1287.59      | 1266.85        | 6.95E-05  | $\tau$ (CH <sub>2</sub> ), $\beta$ (CCH), $\beta$ (CCO)          |
| 1288.75      | 1268.42        | 1.52E-03  | $\tau$ (CH <sub>2</sub> ), $\beta$ (CCH), $\beta$ (CCO)          |

v-stretching, as—asymmetric, s-symmetric,  $\beta$ —in-plane bending,  $\gamma$ —out-of-plane bending,  $\delta$ -scissoring,  $\tau$ -twisting

**Table S13:** Vibrational mode assignment of [ $\alpha$ -a16+H]<sup>+</sup> ion (<sup>2</sup>A).

| Harmonic Vib | Anharmonic Vib | Intensity | Assignment                                                     |
|--------------|----------------|-----------|----------------------------------------------------------------|
| 974.667      | 956.484        | 1.20E-02  | Bending H+ on Acetyl Oxygen, $\beta$ (HCOH), $\beta$ (CH2)     |
| 980.024      | 965.865        | 3.38E-02  | $\beta$ (HCOH), $\beta$ (HCCH), $\beta$ (CH2)                  |
| 996.675      | 980.751        | 8.16E-03  | $\beta$ (HCCH)                                                 |
| 1000.171     | 986.556        | 3.22E-02  | $\beta$ (HCOH), $\beta$ (HCCH), $\beta$ (CH2)                  |
| 1014.178     | 998.44         | 1.00E-02  | $\beta$ (HCOH), $\beta$ (HCCH)                                 |
| 1017.802     | 1004.147       | 1.57E-02  | $\beta$ (HCCH), $\beta$ (CH3)                                  |
| 1022.506     | 1013.37        | 2.28E-02  | Bending H+ on Acetyl Oxygen, $\beta$ (CH3)                     |
| 1041.677     | 1030.531       | 2.67E-02  | $\beta$ (HCOH), $\beta$ (HCCH)                                 |
| 1047.231     | 1038.782       | 9.11E-03  | Bending H+ on Acetyl Oxygen, $\beta$ (CH3)                     |
| 1056.308     | 1025.305       | 4.43E-02  | Bending H+ on Acetyl Oxygen, $\beta$ (CH3), $\beta$ (HCCH)     |
| 1067.354     | 1052.707       | 1.81E-02  | Bending H+ on Acetyl Oxygen, $\beta$ (CH3), $\beta$ (HCCH)     |
| 1069.702     | 1064.303       | 3.36E-02  | $\beta$ (CH3)                                                  |
| 1076.585     | 1064.081       | 1.40E-02  | vas(COC) in glycosidic linkage, $\beta$ (HCOH), $\beta$ (HCCH) |
| 1080.736     | 1059.308       | 2.27E-02  | $\beta$ (HCOH), $\beta$ (HCCH), $\beta$ (CH2), $\beta$ (CH3)   |
| 1087.976     | 1090.16        | 4.02E-02  | $\beta$ (HCOH), $\beta$ (HCCH)                                 |
| 1089.01      | 1073.041       | 5.95E-03  | $\beta$ (HCOH), $\beta$ (CH3)                                  |
| 1103.813     | 1059.413       | 7.44E-02  | Bending H+ on Acetyl Oxygen                                    |
| 1116.034     | 1102.872       | 1.56E-01  | vas(COC) in glycosidic linkage, $\beta$ (HCOH), $\beta$ (HCCH) |
| 1119.09      | 1108.199       | 3.80E-02  | $\beta$ (HCOH), $\beta$ (HCCH)                                 |
| 1121.338     | 1100.445       | 9.44E-02  | Bending H+ on Acetyl Oxygen, $\beta$ (HCOH), $\beta$ (HCCH)    |
| 1126.087     | 1111.104       | 1.45E-02  | Bending H+ on Acetyl Oxygen, $\beta$ (HCOH), $\beta$ (HCCH)    |
| 1129.328     | 1114.967       | 1.05E-02  | $\beta$ (HCOH), $\beta$ (HCCH), $\beta$ (CH3)                  |
| 1132.638     | 1116.051       | 1.12E-02  | $\nu$ (CO), $\beta$ (HCOH), $\beta$ (HCCH)                     |
| 1146.804     | 1130.982       | 3.25E-02  | $\beta$ (HCOH), $\beta$ (HCCH)                                 |
| 1148.048     | 1124.854       | 4.36E-02  | $\beta$ (HCOH), $\beta$ (HCCH)                                 |
| 1153.226     | 1137.201       | 1.05E-02  | $\nu$ (CO), $\beta$ (HCOH), $\beta$ (HCCH)                     |
| 1154.432     | 1135.659       | 5.72E-02  | $\beta$ (HCOH), $\beta$ (HCCH), $\beta$ (CH2)                  |
| 1168.68      | 1152.862       | 2.37E-02  | $\beta$ (HCOH), $\beta$ (HCCH), $\beta$ (CH3)                  |
| 1172.957     | 1155.501       | 5.83E-03  | $\nu$ (CO), $\beta$ (HCOH), $\beta$ (HCCH)                     |
| 1175.796     | 1165.251       | 4.39E-02  | $\beta$ (HCOH), $\beta$ (HCCH), $\beta$ (CH2)                  |
| 1182.617     | 1165.735       | 3.08E-02  | $\beta$ (HCCH), $\beta$ (HCNH)                                 |
| 1188.85      | 1172.895       | 8.08E-03  | $\beta$ (HCOH), $\beta$ (HCCH)                                 |
| 1196.457     | 1182.025       | 2.85E-02  | $\beta$ (HCOH), $\beta$ (HCCH), $\beta$ (CH3)                  |
| 1209.37      | 1184.04        | 2.83E-02  | $\beta$ (HCOH), $\beta$ (HCCH), $\beta$ (CH2)                  |
| 1218.801     | 1201.11        | 1.37E-02  | $\beta$ (HCOH), $\beta$ (HCCH), $\beta$ (CH2)                  |
| 1233.583     | 1231.98        | 3.28E-02  | $\beta$ (HCOH), $\beta$ (HCCH), $\beta$ (CH2)                  |
| 1236.744     | 1205.811       | 2.79E-02  | $\beta$ (HCOH), $\beta$ (HCCH)                                 |
| 1237.678     | 1227.807       | 3.40E-02  | $\beta$ (HCOH), $\beta$ (HCCH)                                 |
| 1240.901     | 1228.294       | 1.62E-02  | $\beta$ (HCOH), $\beta$ (HCCH)                                 |
| 1253.928     | 1246.464       | 7.56E-03  | $\beta$ (HCOH)                                                 |
| 1261.071     | 1246.543       | 1.23E-02  | $\beta$ (HCOH), $\beta$ (HCCH), $\beta$ (CH2)                  |
| 1261.427     | 1243.356       | 1.01E-02  | $\beta$ (HCOH), $\beta$ (HCCH), $\beta$ (CH2)                  |
| 1275.735     | 1246.323       | 6.37E-03  | $\beta$ (HCOH), $\beta$ (HCCH), $\beta$ (CH2)                  |
| 1285.449     | 1268.977       | 1.83E-03  | $\beta$ (HCOH), $\beta$ (HCCH)                                 |
| 1297.621     | 1260.489       | 3.65E-02  | $\beta$ (HCOH), $\beta$ (HCCH)                                 |
| 1306.216     | 1277.084       | 1.65E-02  | $\beta$ (HCOH), $\beta$ (HCCH)                                 |

$\nu$ -stretching, as-asymmetric, s-symmetric,  $\beta$ -in-plane bending,  $\gamma$ -out-of-plane bending,  $\delta$ -scissoring,  $\tau$ -twisting

**Table S14:** Vibrational mode assignment of  $[\beta\text{-a16+H}]^+\text{ ion. (C')}$ 

| <i>Harmonic Vib</i> | <i>Anharmonic Vib</i> | <i>Intensity</i> | <i>Assignment</i>                                                           |
|---------------------|-----------------------|------------------|-----------------------------------------------------------------------------|
| 981.65              | 932.34                | 2.21E-02         | Bending H+ on Acetyl Oxygen, $\beta(\text{CCH})$                            |
| 997.40              | 969.26                | 1.14E-01         | Bending H+ on Acetyl Oxygen, $\beta(\text{CCH})$ , $\beta(\text{CCO})$      |
| 1001.64             | 982.47                | 1.71E-01         | $\beta(\text{CCH})$ , $\beta(\text{CCO})$ , $\beta(\text{CNH})$             |
| 1015.80             | 1000.28               | 2.72E-02         | $\delta(\text{CH}_2)$                                                       |
| 1019.92             | 1007.84               | 8.77E-02         | $\delta(\text{CH}_2)$                                                       |
| 1032.54             | 1014.82               | 2.88E-02         | $\beta(\text{CCH})$ , $\beta(\text{CCO})$                                   |
| 1041.09             | 1047.97               | 3.13E-03         | $\beta(\text{CCH})$ , $\beta(\text{CCO})$                                   |
| 1053.71             | 1037.68               | 4.80E-01         | $\nu(\text{CO})$ , $\nu(\text{CC})$ , $\beta(\text{COH})$                   |
| 1057.17             | 1073.37               | 3.80E-02         | $\delta(\text{CH}_2)$                                                       |
| 1061.53             | 1047.58               | 9.00E-01         | $\nu(\text{CC})$ , $\beta(\text{COH})$                                      |
| 1073.67             | 1059.66               | 1.80E-02         | vas(COC) in glycosidic linkage, $\beta(\text{COH})$ , $\nu(\text{CO})$      |
| 1077.10             | 1078.72               | 1.88E-02         | $\beta(\text{COH})$ , $\beta(\text{CH})$                                    |
| 1086.07             | 1075.78               | 4.92E-01         | $\beta(\text{CCH})$ , $\beta(\text{CCO})$                                   |
| 1088.44             | 1073.50               | 1.55E-02         | $\beta(\text{CCH})$ , $\beta(\text{CCO})$                                   |
| 1102.58             | 1095.20               | 8.13E-02         | $\beta(\text{CCH})$ , $\beta(\text{CCO})$ , $\nu(\text{CC})$                |
| 1106.87             | 1088.42               | 1.38E-01         | $\delta(\text{HCOH})$ , $\nu(\text{CO})$ , $\tau(\text{CH}_2)$              |
| 1113.04             | 1099.94               | 4.63E-02         | $\beta(\text{CCH})$ , $\beta(\text{CCO})$                                   |
| 1113.62             | 1097.26               | 2.91E-03         | $\beta(\text{CCH})$ , $\beta(\text{CCO})$ , $\nu(\text{CO})$                |
| 1120.70             | 1111.24               | 4.01E-01         | $\beta(\text{CCH})$ , $\beta(\text{CCO})$                                   |
| 1124.27             | 1116.74               | 2.45E-01         | $\beta(\text{CCH})$ , $\beta(\text{CCO})$                                   |
| 1128.11             | 1118.22               | 1.27E-01         | $\beta(\text{CCH})$ , $\beta(\text{CCO})$                                   |
| 1133.87             | 1117.95               | 9.06E-01         | vas(CO), $\nu(\text{CO})$ , $\beta(\text{CO})$ , $\beta(\text{CH})$         |
| 1141.36             | 1124.91               | 9.75E-02         | $\nu(\text{CC})$ , $\beta(\text{CO})$ , $\beta(\text{CH})$                  |
| 1147.42             | 1127.45               | 5.76E-01         | vas(CO), $\nu(\text{CO})$ , $\beta(\text{CO})$ , $\beta(\text{CH})$         |
| 1150.72             | 1134.44               | 2.79E-02         | $\nu(\text{CO})$ , $\beta(\text{CO})$ , $\beta(\text{CH})$                  |
| 1160.89             | 1142.91               | 4.12E-03         | $\nu(\text{CC})$ , $\beta(\text{CO})$ , $\beta(\text{CH})$                  |
| 1167.63             | 1150.51               | 7.77E-04         | $\nu(\text{CC})$ , $\beta(\text{CO})$ , $\beta(\text{CH})$                  |
| 1174.04             | 1155.27               | 4.84E-01         | $\nu(\text{CO})$ , $\beta(\text{COC})$ , $\beta(\text{CH})$                 |
| 1176.85             | 1158.19               | 2.37E-01         | $\beta(\text{CCO})$ , $\nu(\text{CO})$ , $\beta(\text{CH})$                 |
| 1184.29             | 1166.01               | 2.45E-02         | $\beta(\text{CCO})$ , $\nu(\text{CO})$ , $\beta(\text{CH})$                 |
| 1187.86             | 1169.02               | 7.30E-02         | $\beta(\text{CCO})$ , $\nu(\text{CO})$ , $\beta(\text{CH})$                 |
| 1190.94             | 1175.31               | 2.66E-02         | $\gamma(\text{CH}_2)$ , $\gamma(\text{HC:OH})$                              |
| 1191.85             | 1168.27               | 7.61E-03         | $\gamma(\text{CH}_2)$ , $\gamma(\text{HC:OH})$                              |
| 1202.43             | 1188.73               | 2.60E-03         | $\delta(\text{HCCH})$ , $\nu(\text{CO})$ , $\beta(\text{COH})$              |
| 1212.28             | 1192.66               | 1.13E-01         | $\beta(\text{COH})$ , $\beta(\text{CCH})$ , vas(COC) in glycosidic linkage, |
| 1220.16             | 1189.58               | 2.41E-01         | $\beta(\text{CCH})$ , $\beta(\text{CCO})$                                   |
| 1235.25             | 1217.90               | 5.66E-02         | $\delta(\text{HCCH})$ , $\beta(\text{COH})$                                 |
| 1242.33             | 1231.98               | 1.39E-02         | $\delta(\text{HCCH})$ , $\beta(\text{COH})$                                 |
| 1251.26             | 1218.79               | 3.01E-02         | $\tau(\text{CH}_2)$                                                         |
| 1255.97             | 1246.00               | 6.71E-03         | $\beta(\text{CCH})$ , $\beta(\text{CCO})$                                   |
| 1258.42             | 1281.33               | 1.20E-01         | $\delta(\text{HCOH})$                                                       |
| 1265.92             | 1241.76               | 2.53E-02         | $\gamma(\text{CH}_2)$ , $\gamma(\text{HC:OH})$                              |
| 1283.82             | 1263.92               | 1.11E-02         | $\gamma(\text{CH}_2)$ , $\gamma(\text{HC:OH})$                              |
| 1290.42             | 1270.33               | 5.75E-03         | $\beta(\text{CH}_3)$ , $\beta(\text{CCH})$ , $\beta(\text{CCO})$            |
| 1296.20             | 1267.49               | 1.14E-01         | $\beta(\text{CH}_3)$ , $\beta(\text{CCH})$ , $\beta(\text{CCO})$            |
| 1300.81             | 1269.51               | 5.12E-03         | $\beta(\text{CH}_3)$ , $\beta(\text{CCH})$ , $\beta(\text{CCO})$            |

$\nu$ -stretching, as-asymmetric, s-symmetric,  $\beta$ -in-plane bending,  $\gamma$ -out-of-plane bending,  $\delta$ -scissoring,  $\tau$ -twisting

**Table S15** Vibrational mode assignment of [ $\alpha$ -an16+H]<sup>+</sup> ion.(D)

| Harmonic Vib | Anharmonic Vib | Intensity | Assignment                                                                                     |
|--------------|----------------|-----------|------------------------------------------------------------------------------------------------|
| 967.50       | 953.84         | 1.06E-03  | $\beta$ (OH), $\beta$ (HCCH), $\tau$ (CH <sub>2</sub> ), $\tau$ (CH <sub>3</sub> )             |
| 977.24       | 947.21         | 7.96E-05  | Bending H <sup>+</sup> on Acetyl Oxygen, $\beta$ (HCNH)                                        |
| 980.30       | 967.42         | 5.95E-04  | $\beta$ (HCCH), $\beta$ (OH)                                                                   |
| 997.00       | 985.50         | 3.54E-04  | $\beta$ (OH), $\beta$ (HCCH), $\tau$ (CH <sub>2</sub> )                                        |
| 1015.13      | 1009.74        | 3.97E-03  | Bending H <sup>+</sup> on Acetyl Oxygen, $\tau$ (CH <sub>3</sub> )                             |
| 1021.35      | 1014.72        | 8.52E-03  | Bending H <sup>+</sup> on Acetyl Oxygen, $\tau$ (CH <sub>3</sub> ), $\beta$ (HCCH)             |
| 1024.51      | 1023.84        | 3.26E-04  | Bending H <sup>+</sup> on Acetyl Oxygen, $\tau$ (CH <sub>3</sub> )                             |
| 1049.47      | 1022.08        | 2.16E-03  | Bending H <sup>+</sup> on Acetyl Oxygen, $\tau$ (CH <sub>3</sub> )                             |
| 1058.49      | 1045.16        | 2.44E-03  | $\beta$ (OH), $\beta$ (HCCH), $\tau$ (CH <sub>2</sub> ), $\tau$ (CH <sub>3</sub> ), $\nu$ (CO) |
| 1062.27      | 1024.67        | 5.22E-04  | Bending H <sup>+</sup> on Acetyl Oxygen, $\tau$ (CH <sub>3</sub> )                             |
| 1071.98      | 1053.14        | 3.71E-04  | Bending H <sup>+</sup> on Acetyl Oxygen, $\tau$ (CH <sub>3</sub> ), $\beta$ (HCCH)             |
| 1074.92      | 1064.18        | 3.53E-04  | $\nu$ s(COC) in glycosidic linkage, $\delta$ (HCOH)                                            |
| 1077.20      | 1054.08        | 1.80E-03  | Bending H <sup>+</sup> on Acetyl Oxygen                                                        |
| 1089.66      | 1080.92        | 2.52E-05  | Bending H <sup>+</sup> on Acetyl Oxygen, $\beta$ (OH)                                          |
| 1090.82      | 1078.84        | 7.77E-05  | $\beta$ (OH), $\beta$ (HCCH), $\tau$ (CH <sub>2</sub> ), $\tau$ (CH <sub>3</sub> ), $\nu$ (CO) |
| 1100.64      | 1089.47        | 1.26E-04  | $\beta$ (OH), $\beta$ (HCCH), $\nu$ (CC)                                                       |
| 1110.10      | 1101.51        | 5.62E-04  | Bending H <sup>+</sup> on Acetyl Oxygen, $\beta$ (OH)                                          |
| 1113.19      | 1099.24        | 2.21E-03  | Bending H <sup>+</sup> on Acetyl Oxygen, $\beta$ (OH), $\beta$ (HCOH),                         |
| 1114.38      | 1099.63        | 7.44E-04  | Bending H <sup>+</sup> on Acetyl Oxygen, $\beta$ (OH), $\beta$ (HCOH),                         |
| 1119.49      | 1109.43        | 1.50E-04  | $\beta$ (OH), $\delta$ (HCOH), $\tau$ (CH <sub>3</sub> )                                       |
| 1122.98      | 1109.64        | 3.10E-03  | $\beta$ (OH), $\delta$ (HCOH), $\tau$ (CH <sub>3</sub> )                                       |
| 1130.66      | 1119.54        | 2.96E-03  | $\beta$ (OH), $\delta$ (HCOH)                                                                  |
| 1135.89      | 1120.74        | 4.51E-05  | $\beta$ (OH), $\delta$ (HCOH), $\tau$ (CH <sub>2</sub> )                                       |
| 1138.16      | 1122.06        | 4.30E-04  | $\nu$ as(COC), $\delta$ (HCOH)                                                                 |
| 1139.44      | 1127.92        | 8.28E-05  | $\beta$ (OH), $\delta$ (HCOH)                                                                  |
| 1151.41      | 1137.36        | 1.04E-04  | $\beta$ (OH), $\delta$ (HCOH)                                                                  |
| 1158.31      | 1141.11        | 1.40E-04  | $\beta$ (OH), $\delta$ (HCOH)                                                                  |
| 1161.00      | 1144.14        | 6.33E-05  | $\beta$ (OH), $\delta$ (HCOH), $\tau$ (CH <sub>2</sub> )                                       |
| 1169.74      | 1152.69        | 2.07E-05  | $\nu$ s(COC) in glycosidic linkage, $\delta$ (HCOH), $\beta$ (OH)                              |
| 1172.59      | 1154.58        | 7.21E-04  | $\beta$ (OH), $\beta$ (HCOH)                                                                   |
| 1182.30      | 1165.13        | 1.23E-05  | $\delta$ (HCOH), $\tau$ (CH <sub>3</sub> )                                                     |
| 1185.93      | 1167.83        | 1.53E-04  | $\delta$ (HCCH), $\nu$ (CN)                                                                    |
| 1192.95      | 1177.33        | 4.19E-03  | $\beta$ (OH), $\delta$ (HCOH), $\tau$ (CH <sub>3</sub> )                                       |
| 1201.53      | 1193.99        | 7.42E-05  | $\delta$ (HCCH), $\delta$ (HCOH)                                                               |
| 1204.33      | 1188.64        | 1.73E-03  | $\beta$ (OH), $\delta$ (HCOH), $\tau$ (CH <sub>3</sub> )                                       |
| 1214.89      | 1205.55        | 4.92E-05  | $\delta$ (HCCH), $\delta$ (HCOH)                                                               |
| 1222.83      | 1217.88        | 5.47E-04  | $\delta$ (HCCH), $\delta$ (HCOH)                                                               |
| 1231.95      | 1219.20        | 5.11E-04  | $\delta$ (HCCH), $\delta$ (HCOH)                                                               |
| 1239.39      | 1227.95        | 6.56E-04  | $\delta$ (HCCH), $\delta$ (HCOH)                                                               |
| 1246.50      | 1244.21        | 1.10E-03  | $\beta$ (OH), $\beta$ (HCCH)                                                                   |
| 1257.77      | 1251.47        | 4.85E-04  | $\delta$ (HCOH)                                                                                |
| 1262.72      | 1235.60        | 1.69E-03  | $\beta$ (OH), $\delta$ (HCOH), $\tau$ (CH <sub>2</sub> )                                       |
| 1273.31      | 1260.50        | 1.63E-04  | $\beta$ (OH), $\delta$ (HCOH), $\tau$ (CH <sub>2</sub> )                                       |
| 1275.75      | 1258.34        | 2.54E-03  | $\beta$ (OH), $\delta$ (HCOH), $\tau$ (CH <sub>2</sub> )                                       |
| 1281.23      | 1254.01        | 4.81E-04  | $\beta$ (OH), $\delta$ (HCOH), $\tau$ (CH <sub>2</sub> )                                       |
| 1297.58      | 1261.93        | 3.96E-05  | $\beta$ (OH), $\beta$ (HCCH)                                                                   |

$\nu$ -stretching, as—asymmetric, s-symmetric,  $\beta$ —in-plane bending,  $\gamma$ —out-of-plane bending,  $\delta$ —scissoring,  $\tau$ -twisting

**Table S16:** Vibrational mode assignment of [ $\alpha$ -an16+H]<sup>+</sup> ion (<sup>2</sup>D)

| Harmonic Vib | Anharmonic Vib | Intensity | Assignment                                                     |
|--------------|----------------|-----------|----------------------------------------------------------------|
| 958.776      | 939.879        | 1.40E-02  | $\beta$ (HCOH), $\beta$ (CH2)                                  |
| 965.394      | 950.152        | 6.23E-03  | $\beta$ (HCCH), $\beta$ (CH2)                                  |
| 983.841      | 966.711        | 3.86E-02  | Bending H+ on Acetyl Oxygen, $\beta$ (HCNH)                    |
| 990.314      | 974.485        | 3.04E-03  | $\beta$ (HCCH)                                                 |
| 993.907      | 974.973        | 1.14E-02  | $\beta$ (HCCH)                                                 |
| 1017.728     | 1006.407       | 2.49E-02  | $\beta$ (HCCH), $\beta$ (CH3)                                  |
| 1025.122     | 1015.024       | 2.77E-03  | $\beta$ (HCCH), $\beta$ (CH3)                                  |
| 1034.303     | 1030.262       | 8.69E-03  | $\beta$ (CH3)                                                  |
| 1045.053     | 1029.905       | 5.24E-02  | $\beta$ (CH3)                                                  |
| 1058.255     | 1046.319       | 9.39E-03  | $\beta$ (HCCH), $\tau$ (CH3)                                   |
| 1061.11      | 1047.428       | 2.58E-02  | $\beta$ (HCCH), $\tau$ (CH3)                                   |
| 1080.298     | 1068.876       | 5.95E-02  | vs(COC) in glycosidic linkage, $\beta$ (HCOH)                  |
| 1085.484     | 1070.469       | 3.85E-02  | vas(COC) in glycosidic linkage, $\beta$ (HCOH), $\tau$ (CH2)   |
| 1092.836     | 1081.065       | 1.96E-02  | $\tau$ (CH2), $\beta$ (HCOH)                                   |
| 1103.637     | 1094.16        | 5.20E-03  | $\beta$ (HCOH)                                                 |
| 1109.288     | 1092.33        | 2.03E-02  | $\beta$ (HCOH), $\beta$ (HCCH)                                 |
| 1113.726     | 1097.405       | 7.75E-02  | $\beta$ (HCOH), $\beta$ (HCCH)                                 |
| 1117.794     | 1105.012       | 2.57E-02  | $\beta$ (HCOH), $\beta$ (HCCH)                                 |
| 1125.676     | 1113.195       | 2.64E-02  | $\nu$ (CO), $\beta$ (HCOH), $\beta$ (HCCH)                     |
| 1128.93      | 1117.966       | 4.52E-02  | $\nu$ (CO), $\beta$ (HCOH), $\beta$ (HCCH)                     |
| 1135.023     | 1117.389       | 4.64E-02  | $\nu$ (CO), $\beta$ (HCOH), $\beta$ (HCCH)                     |
| 1139.222     | 1124.598       | 1.80E-02  | $\nu$ (CC), $\beta$ (HCOH), $\beta$ (HCCH)                     |
| 1142.448     | 1128.477       | 3.30E-02  | vas(COC) in glycosidic linkage, $\nu$ (CC), $\beta$ (HCOH)     |
| 1153.399     | 1138.712       | 4.65E-02  | $\nu$ (CC), $\beta$ (HCOH), $\beta$ (HCCH)                     |
| 1156.254     | 1140.862       | 2.02E-02  | $\nu$ (CC), vas(COC), $\beta$ (HCOH), $\beta$ (HCCH)           |
| 1160.386     | 1144.882       | 3.95E-02  | $\beta$ (HCCH)                                                 |
| 1162.397     | 1152.777       | 2.64E-02  | $\beta$ (HCOH), $\beta$ (HCCH)                                 |
| 1173.156     | 1155.829       | 1.10E-02  | $\nu$ (CO), $\beta$ (HCOH), $\beta$ (HCCH)                     |
| 1179.323     | 1161.099       | 2.77E-02  | $\beta$ (HCCH), $\tau$ (CH3)                                   |
| 1180.82      | 1164.481       | 5.21E-02  | vas(COC), $\beta$ (HCOH), $\beta$ (HCCH)                       |
| 1186.932     | 1168.904       | 5.74E-02  | $\nu$ (CO), $\beta$ (HCOH), $\beta$ (HCCH), $\beta$ (CH3)      |
| 1191.736     | 1171.935       | 3.00E-02  | vas(COC), $\beta$ (HCOH), $\beta$ (HCCH)                       |
| 1194.79      | 1180.177       | 1.15E-02  | vas(COC) in glycosidic linkage, $\nu$ (CC), $\beta$ (HCOH)     |
| 1202.951     | 1185.306       | 8.97E-03  | vas(COC) in glycosidic linkage, $\beta$ (HCOH), $\beta$ (HCCH) |
| 1217.874     | 1201.015       | 2.56E-02  | $\beta$ (HCOH), $\beta$ (HCCH)                                 |
| 1220.991     | 1215.613       | 1.88E-02  | $\beta$ (HCCH), $\beta$ (HCOH), $\tau$ (CH2)                   |
| 1238.84      | 1226.956       | 2.84E-03  | $\beta$ (HCOH), $\beta$ (HCCH)                                 |
| 1242.694     | 1229.352       | 1.51E-02  | $\beta$ (HCCH), $\beta$ (HCOH), $\tau$ (CH2)                   |
| 1250.478     | 1240.669       | 2.43E-02  | $\beta$ (HCOH), $\beta$ (HCCH)                                 |
| 1251.959     | 1235.388       | 2.00E-02  | $\beta$ (HCOH), $\beta$ (HCCH), $\beta$ (HCNH)                 |
| 1269.828     | 1253.488       | 1.16E-02  | $\beta$ (HCCH), $\beta$ (HCOH), $\tau$ (CH2)                   |
| 1279.717     | 1256.012       | 2.69E-03  | $\beta$ (HCCH), $\beta$ (HCOH), $\tau$ (CH2)                   |
| 1286.255     | 1269.787       | 1.78E-02  | $\beta$ (HCCH), $\beta$ (HCOH)                                 |
| 1288.293     | 1266.141       | 1.56E-03  | $\beta$ (HCOH), $\beta$ (HCCH), $\beta$ (HCNH)                 |
| 1298.122     | 1266.36        | 1.22E-02  | $\beta$ (HCNH), $\tau$ (CH2)                                   |

$\nu$ -stretching, as-asymmetric, s-symmetric,  $\beta$ -in-plane bending,  $\gamma$ -out-of-plane bending,  $\delta$ -scissoring,  $\tau$ -twisting

**Table S17: Vibrational mode assignment of  $[\beta\text{-an16+H}]^+$  (D')**

| Harmonic Vib | Anharmonic Vib | Intensity | Assignment                                                                          |
|--------------|----------------|-----------|-------------------------------------------------------------------------------------|
| 970.10       | 948.31         | 2.25E-04  | $\beta(\text{OH})$ , $\tau(\text{CH}_2)$                                            |
| 983.24       | 967.42         | 2.79E-03  | $\beta(\text{OH})$ , $\delta(\text{HCCH})$ , $\tau(\text{CH}_3)$                    |
| 993.31       | 980.85         | 1.46E-05  | $\delta(\text{HCCH})$ , $\tau(\text{CH}_3)$                                         |
| 1000.53      | 983.71         | 1.54E-03  | $\delta(\text{HCCH})$ , $\tau(\text{CH}_3)$                                         |
| 1016.63      | 1011.34        | 8.58E-04  | $\tau(\text{CH}_3)$                                                                 |
| 1017.22      | 1012.99        | 3.15E-03  | $\tau(\text{CH}_3)$                                                                 |
| 1044.61      | 1034.05        | 5.77E-04  | $\beta(\text{OH})$ , $\delta(\text{HCCH})$ , $\tau(\text{CH}_3)$                    |
| 1052.17      | 1063.16        | 4.24E-05  | $\beta(\text{OH})$ , $\nu(\text{COC})$ , $\tau(\text{CH}_3)$                        |
| 1058.21      | 1047.28        | 2.78E-03  | $\beta(\text{OH})$ , $\nu(\text{CO})$ , $\tau(\text{CH}_3)$                         |
| 1068.71      | 1057.86        | 3.40E-04  | $\beta(\text{OH})$ , $\tau(\text{CH}_3)$                                            |
| 1072.79      | 1068.15        | 4.34E-05  | $\delta(\text{HCCH})$ , $\tau(\text{CH}_3)$                                         |
| 1075.76      | 1062.26        | 2.98E-04  | $\beta(\text{OH})$ , $\nu(\text{CO})$ , $\tau(\text{CH}_2)$ , $\tau(\text{CH}_3)$   |
| 1088.87      | 1073.74        | 3.28E-03  | $\beta(\text{HCCH})$ , $\nu(\text{CC})$ , $\beta(\text{OH})$                        |
| 1091.39      | 1080.51        | 6.25E-04  | $\beta(\text{HCCH})$ , $\nu(\text{CC})$ , $\beta(\text{OH})$                        |
| 1103.51      | 1094.47        | 2.82E-04  | $\beta(\text{HCCH})$ , $\nu(\text{CC})$ , $\beta(\text{OH})$                        |
| 1110.89      | 1100.13        | 4.85E-03  | $\beta(\text{HCCH})$ , $\beta(\text{OH})$                                           |
| 1114.86      | 1098.43        | 1.59E-03  | $\beta(\text{HCCH})$ , $\beta(\text{OH})$ , $\nu(\text{COC})$                       |
| 1117.41      | 1107.99        | 1.68E-03  | $\beta(\text{OH})$ , $\delta(\text{HCCH})$ , $\tau(\text{CH}_2)$                    |
| 1120.01      | 1109.16        | 2.16E-04  | $\beta(\text{OH})$ , $\delta(\text{HCCH})$ , $\tau(\text{CH}_3)$                    |
| 1123.63      | 1107.02        | 6.85E-05  | $\beta(\text{OH})$ , $\delta(\text{HCCH})$ , $\tau(\text{CH}_2)$                    |
| 1132.28      | 1119.47        | 5.20E-06  | $\beta(\text{OH})$ , $\delta(\text{HCCH})$ , $\tau(\text{CH}_3)$                    |
| 1139.34      | 1122.15        | 1.03E-04  | $\beta(\text{HCCH})$ , $\beta(\text{OH})$ , $\nu(\text{CO})$                        |
| 1141.14      | 1126.76        | 1.51E-03  | $\beta(\text{OH})$ , $\delta(\text{HCCH})$ , $\tau(\text{CH}_3)$                    |
| 1152.32      | 1133.69        | 1.61E-04  | $\beta(\text{HCCH})$ , $\beta(\text{OH})$ , $\nu(\text{CO})$                        |
| 1153.02      | 1137.67        | 9.60E-05  | $\beta(\text{HCCH})$ , $\nu(\text{CC})$                                             |
| 1155.03      | 1140.39        | 5.11E-04  | $\beta(\text{OH})$ , $\delta(\text{HCCH})$ , $\tau(\text{CH}_2)$                    |
| 1160.25      | 1143.43        | 1.88E-03  | $\beta(\text{HCCH})$ , $\beta(\text{OH})$ , $\nu(\text{CO})$                        |
| 1162.08      | 1153.03        | 5.24E-05  | $\beta(\text{OH})$ , $\delta(\text{HCCH})$ , $\tau(\text{CH}_3)$ , $\nu(\text{CN})$ |
| 1172.77      | 1149.10        | 8.35E-05  | $\beta(\text{HCCH})$ , $\nu(\text{CO})$                                             |
| 1173.29      | 1157.55        | 4.65E-05  | $\beta(\text{HCCH})$ , $\beta(\text{CH}_3)$                                         |
| 1179.10      | 1158.89        | 3.07E-05  | $\beta(\text{HCCH})$ , $\nu(\text{CO})$                                             |
| 1182.84      | 1167.82        | 4.18E-04  | Bending H+ on Acetyl Oxygen, $\beta(\text{OH})$ , $\nu(\text{COC})$                 |
| 1188.11      | 1172.88        | 2.81E-04  | $\nu(\text{COC})$ in glycosidic linkage, $\beta(\text{CH}_3)$ , $\beta(\text{OH})$  |
| 1196.79      | 1182.57        | 5.39E-05  | $\delta(\text{HCOH})$ , $\tau(\text{CH}_3)$                                         |
| 1206.82      | 1187.26        | 6.19E-05  | $\nu(\text{COC})$ in glycosidic linkage, $\beta(\text{HCCH})$ , $\beta(\text{OH})$  |
| 1222.02      | 1205.70        | 3.93E-04  | $\beta(\text{HCOH})$ , $\tau(\text{CH}_2)$                                          |
| 1225.68      | 1206.61        | 1.83E-04  | $\beta(\text{HCOH})$ , $\beta(\text{HCCH})$ , $\tau(\text{CH}_2)$                   |
| 1235.37      | 1224.47        | 7.26E-04  | $\beta(\text{HCOH})$ , $\beta(\text{HCCH})$ , $\tau(\text{CH}_3)$                   |
| 1241.17      | 1227.11        | 7.95E-04  | $\beta(\text{HCOH})$ , $\beta(\text{HCCH})$ , $\tau(\text{CH}_2)$                   |
| 1249.78      | 1246.92        | 9.23E-04  | $\beta(\text{HCOH})$                                                                |
| 1259.94      | 1245.75        | 3.25E-04  | $\beta(\text{HCOH})$                                                                |
| 1270.72      | 1248.95        | 3.44E-04  | $\beta(\text{HCOH})$ , $\beta(\text{HCCH})$ , $\tau(\text{CH}_2)$                   |
| 1275.22      | 1253.01        | 1.27E-03  | $\beta(\text{HCOH})$ , $\beta(\text{HCCH})$ , $\tau(\text{CH}_2)$                   |
| 1283.57      | 1262.00        | 4.07E-04  | $\beta(\text{HCOH})$ , $\beta(\text{HCCH})$ , $\tau(\text{CH}_2)$                   |
| 1290.57      | 1270.27        | 1.26E-04  | $\beta(\text{HCOH})$ , $\beta(\text{HCCH})$ , $\tau(\text{CH}_2)$                   |
| 1295.59      | 1270.05        | 1.60E-03  | $\beta(\text{HCOH})$ , $\beta(\text{HCCH})$ , $\tau(\text{CH}_2)$                   |

$\nu$ -stretching, as-asymmetric, s-symmetric,  $\beta$ -in-plane bending,  $\gamma$ -out-of-plane bending,  $\delta$ -scissoring,  $\tau$ -twisting

**Table S18: Vibrational mode assignment of  $[\beta\text{-an16+H}]^+(\text{}^2D')$** 

| Harmonic Vib | Anharmonic Vib | Intensity | Assignment                                                                                |
|--------------|----------------|-----------|-------------------------------------------------------------------------------------------|
| 974.667      | 956.484        | 1.20E-02  | Bending H+ on Acetyl Oxygen, $\beta(\text{HCOH})$ , $\beta(\text{CH}_2)$                  |
| 980.024      | 965.865        | 3.38E-02  | $\beta(\text{HCOH})$ , $\beta(\text{HCCH})$ , $\beta(\text{CH}_2)$                        |
| 996.675      | 980.751        | 8.16E-03  | $\beta(\text{HCCH})$                                                                      |
| 1000.171     | 986.556        | 3.22E-02  | $\beta(\text{HCOH})$ , $\beta(\text{HCCH})$ , $\beta(\text{CH}_2)$                        |
| 1014.178     | 998.44         | 1.00E-02  | $\beta(\text{HCOH})$ , $\beta(\text{HCCH})$                                               |
| 1017.802     | 1004.147       | 1.57E-02  | $\beta(\text{HCCH})$ , $\beta(\text{CH}_3)$                                               |
| 1022.506     | 1013.37        | 2.28E-02  | Bending H+ on Acetyl Oxygen, $\beta(\text{CH}_3)$                                         |
| 1041.677     | 1030.531       | 2.67E-02  | $\beta(\text{HCOH})$ , $\beta(\text{HCCH})$                                               |
| 1047.231     | 1038.782       | 9.11E-03  | Bending H+ on Acetyl Oxygen, $\beta(\text{CH}_3)$                                         |
| 1056.308     | 1025.305       | 4.43E-02  | Bending H+ on Acetyl Oxygen, $\beta(\text{CH}_3)$ , $\beta(\text{HCCH})$                  |
| 1067.354     | 1052.707       | 1.81E-02  | Bending H+ on Acetyl Oxygen, $\beta(\text{CH}_3)$ , $\beta(\text{HCCH})$                  |
| 1069.702     | 1064.303       | 3.36E-02  | $\beta(\text{CH}_3)$                                                                      |
| 1076.585     | 1064.081       | 1.40E-02  | vas(COC) in glycosidic linkage, $\beta(\text{HCOH})$ , $\beta(\text{HCCH})$               |
| 1080.736     | 1059.308       | 2.27E-02  | $\beta(\text{HCOH})$ , $\beta(\text{HCCH})$ , $\beta(\text{CH}_2)$ , $\beta(\text{CH}_3)$ |
| 1087.976     | 1090.16        | 4.02E-02  | $\beta(\text{HCOH})$ , $\beta(\text{HCCH})$                                               |
| 1089.01      | 1073.041       | 5.95E-03  | $\beta(\text{HCOH})$ , $\beta(\text{CH}_3)$                                               |
| 1103.813     | 1059.413       | 7.44E-02  | Bending H+ on Acetyl Oxygen                                                               |
| 1116.034     | 1102.872       | 1.56E-01  | vas(COC) in glycosidic linkage, $\beta(\text{HCOH})$ , $\beta(\text{HCCH})$               |
| 1119.09      | 1108.199       | 3.80E-02  | $\beta(\text{HCOH})$ , $\beta(\text{HCCH})$                                               |
| 1121.338     | 1100.445       | 9.44E-02  | Bending H+ on Acetyl Oxygen, $\beta(\text{HCOH})$ , $\beta(\text{HCCH})$                  |
| 1126.087     | 1111.104       | 1.45E-02  | Bending H+ on Acetyl Oxygen, $\beta(\text{HCOH})$ , $\beta(\text{HCCH})$                  |
| 1129.328     | 1114.967       | 1.05E-02  | $\beta(\text{HCOH})$ , $\beta(\text{HCCH})$ , $\beta(\text{CH}_3)$                        |
| 1132.638     | 1116.051       | 1.12E-02  | v(CO), $\beta(\text{HCOH})$ , $\beta(\text{HCCH})$                                        |
| 1146.804     | 1130.982       | 3.25E-02  | $\beta(\text{HCOH})$ , $\beta(\text{HCCH})$                                               |
| 1148.048     | 1124.854       | 4.36E-02  | $\beta(\text{HCOH})$ , $\beta(\text{HCCH})$                                               |
| 1153.226     | 1137.201       | 1.05E-02  | v(CO), $\beta(\text{HCOH})$ , $\beta(\text{HCCH})$                                        |
| 1154.432     | 1135.659       | 5.72E-02  | $\beta(\text{HCOH})$ , $\beta(\text{HCCH})$ , $\beta(\text{CH}_2)$                        |
| 1168.68      | 1152.862       | 2.37E-02  | $\beta(\text{HCOH})$ , $\beta(\text{HCCH})$ , $\beta(\text{CH}_3)$                        |
| 1172.957     | 1155.501       | 5.83E-03  | v(CO), $\beta(\text{HCOH})$ , $\beta(\text{HCCH})$                                        |
| 1175.796     | 1165.251       | 4.39E-02  | $\beta(\text{HCOH})$ , $\beta(\text{HCCH})$ , $\beta(\text{CH}_2)$                        |
| 1182.617     | 1165.735       | 3.08E-02  | $\beta(\text{HCCH})$ , $\beta(\text{HCNH})$                                               |
| 1188.85      | 1172.895       | 8.08E-03  | $\beta(\text{HCOH})$ , $\beta(\text{HCCH})$                                               |
| 1196.457     | 1182.025       | 2.85E-02  | $\beta(\text{HCOH})$ , $\beta(\text{HCCH})$ , $\beta(\text{CH}_3)$                        |
| 1209.37      | 1184.04        | 2.83E-02  | $\beta(\text{HCOH})$ , $\beta(\text{HCCH})$ , $\beta(\text{CH}_2)$                        |
| 1218.801     | 1201.11        | 1.37E-02  | $\beta(\text{HCOH})$ , $\beta(\text{HCCH})$ , $\beta(\text{CH}_2)$                        |
| 1233.583     | 1231.98        | 3.28E-02  | $\beta(\text{HCOH})$ , $\beta(\text{HCCH})$ , $\beta(\text{CH}_2)$                        |
| 1236.744     | 1205.811       | 2.79E-02  | $\beta(\text{HCOH})$ , $\beta(\text{HCCH})$                                               |
| 1237.678     | 1227.807       | 3.40E-02  | $\beta(\text{HCOH})$ , $\beta(\text{HCCH})$                                               |
| 1240.901     | 1228.294       | 1.62E-02  | $\beta(\text{HCOH})$ , $\beta(\text{HCCH})$                                               |
| 1253.928     | 1246.464       | 7.56E-03  | $\beta(\text{HCOH})$                                                                      |
| 1261.071     | 1246.543       | 1.23E-02  | $\beta(\text{HCOH})$ , $\beta(\text{HCCH})$ , $\beta(\text{CH}_2)$                        |
| 1261.427     | 1243.356       | 1.01E-02  | $\beta(\text{HCOH})$ , $\beta(\text{HCCH})$ , $\beta(\text{CH}_2)$                        |
| 1275.735     | 1246.323       | 6.37E-03  | $\beta(\text{HCOH})$ , $\beta(\text{HCCH})$ , $\beta(\text{CH}_2)$                        |
| 1285.449     | 1268.977       | 1.83E-03  | $\beta(\text{HCOH})$ , $\beta(\text{HCCH})$                                               |
| 1297.621     | 1260.489       | 3.65E-02  | $\beta(\text{HCOH})$ , $\beta(\text{HCCH})$                                               |
| 1306.216     | 1277.084       | 1.65E-02  | $\beta(\text{HCOH})$ , $\beta(\text{HCCH})$                                               |

v-stretching, as—asymmetric, s-symmetric,  $\beta$ -in-plane bending,  $\gamma$ -out-of-plane bending,  $\delta$ -scissoring,  $\tau$ -twisting



**Table S19: Vibrational mode assignment of  $[\alpha\text{-bn16+H}]^+$  ion. (E)**

| Harmonic Vib | Anharmonic Vib | Intensity | Assignment                                                                |
|--------------|----------------|-----------|---------------------------------------------------------------------------|
| 971.81       | 961.28         | 6.94E-03  | $\beta$ (HCCH), $\beta$ (CH <sub>3</sub> )                                |
| 977.30       | 948.91         | 3.40E-01  | Bending H+ on Acetyl Oxygen, $\beta$ (NH)                                 |
| 980.30       | 964.71         | 3.77E-03  | $\beta$ (HCCH), $\beta$ (CO)                                              |
| 1011.42      | 999.10         | 1.53E-01  | $\beta$ (HCCH), $\beta$ (CH <sub>3</sub> )                                |
| 1014.17      | 1008.76        | 6.81E-03  | Bending H+ on Acetyl Oxygen, $\beta$ (CH <sub>3</sub> )                   |
| 1023.63      | 1025.06        | 2.74E-02  | Bending H+ on Acetyl Oxygen, $\beta$ (CH <sub>3</sub> )                   |
| 1048.42      | 1022.47        | 1.12E-02  | Bending H+ on Acetyl Oxygen, $\beta$ (CH <sub>3</sub> )                   |
| 1050.18      | 1036.21        | 8.69E-02  | Bending H+ on Acetyl Oxygen, $\beta$ (CH <sub>3</sub> )                   |
| 1060.64      | 1036.00        | 7.14E-02  | Bending H+ on Acetyl Oxygen, $\beta$ (CH <sub>3</sub> )                   |
| 1066.73      | 1037.74        | 9.40E-02  | Bending H+ on Acetyl Oxygen, $\beta$ (CH <sub>3</sub> )                   |
| 1071.02      | 1052.77        | 7.19E-02  | $\beta$ (HCCH), $\beta$ (CO), $\nu$ (CO)                                  |
| 1078.05      | 1058.68        | 7.62E-02  | Bending H+ on Acetyl Oxygen, $\beta$ (HCCH), $\beta$ (CO)                 |
| 1082.41      | 1068.65        | 4.70E-01  | $\beta$ (CO), $\nu$ (COC)                                                 |
| 1089.59      | 1083.52        | 6.14E-03  | $\beta$ (CO), $\beta$ (HCCH)                                              |
| 1090.99      | 1076.92        | 3.52E-02  | Bending H+ on Acetyl Oxygen, $\beta$ (CH <sub>3</sub> ), $\beta$ (CO)     |
| 1101.08      | 1096.44        | 1.62E-02  | $\beta$ (CO), $\nu$ (COC) in glycosidic linkage                           |
| 1103.59      | 1094.94        | 7.58E-03  | $\beta$ (CO), $\nu$ (COC) in glycosidic linkage                           |
| 1111.95      | 1100.70        | 9.85E-02  | $\beta$ (CO), $\nu$ (COC) in glycosidic linkage                           |
| 1113.51      | 1103.42        | 4.41E-02  | $\nu$ (COC), $\beta$ (CO)                                                 |
| 1122.36      | 1108.87        | 8.77E-02  | $\nu$ (COC), $\beta$ (CO), $\nu$ (CO)                                     |
| 1130.10      | 1110.53        | 7.06E-02  | Bending H+ on Acetyl Oxygen, $\beta$ (CO)                                 |
| 1134.52      | 1118.98        | 5.00E-01  | $\nu$ (OCO), $\beta$ (CO)                                                 |
| 1136.43      | 1116.37        | 4.39E-01  | $\nu$ (COC) in glycosidic linkage, $\nu$ (CO)                             |
| 1140.37      | 1128.98        | 1.51E-02  | $\beta$ (HCCH), $\beta$ (CO), $\nu$ (CO)                                  |
| 1146.01      | 1131.28        | 9.06E-01  | $\nu$ (COC), $\beta$ (CO), $\nu$ (CO)                                     |
| 1155.09      | 1142.07        | 4.32E-02  | $\beta$ (CH <sub>3</sub> ), $\beta$ (CO), $\nu$ (CO)                      |
| 1157.61      | 1138.23        | 6.94E-02  | $\nu$ (CC), $\nu$ (COC) in glycosidic linkage, $\nu$ (CO)                 |
| 1162.67      | 1142.40        | 4.01E-02  | $\beta$ (CO), $\tau$ (CH <sub>2</sub> ), $\nu$ (CO)                       |
| 1171.10      | 1153.59        | 2.15E-02  | $\beta$ (CO), $\beta$ (CH <sub>3</sub> )                                  |
| 1173.98      | 1154.91        | 2.86E-02  | $\nu$ (CC), $\nu$ (COC) in glycosidic linkage, $\nu$ (CO)                 |
| 1176.53      | 1166.00        | 2.30E-02  | $\beta$ (CO), $\nu$ (CO)                                                  |
| 1186.33      | 1165.75        | 2.58E-02  | $\nu$ (CN), $\nu$ (COC), $\beta$ (CC)                                     |
| 1192.93      | 1180.68        | 6.90E-02  | $\beta$ (CO), $\beta$ (CH <sub>3</sub> )                                  |
| 1203.09      | 1191.04        | 7.10E-02  | $\nu$ (COC) in glycosidic linkage, $\delta$ (HCCH)                        |
| 1214.44      | 1197.41        | 2.93E-02  | $\nu$ (COC) in glycosidic linkage, $\delta$ (HCCH), $\beta$ (CO)          |
| 1216.66      | 1204.16        | 2.52E-01  | $\nu$ (COC) in glycosidic linkage, $\delta$ (HCCH), $\beta$ (CO)          |
| 1223.81      | 1219.54        | 2.95E-01  | $\delta$ (HCOH), $\beta$ (CO)                                             |
| 1226.82      | 1217.44        | 1.94E-01  | $\delta$ (HCOH), $\beta$ (CO)                                             |
| 1230.92      | 1215.36        | 1.28E-02  | $\delta$ (HCOH), $\beta$ (CO), $\tau$ (CH <sub>2</sub> )                  |
| 1255.00      | 1242.72        | 8.83E-02  | $\delta$ (HCOH), $\beta$ (CO), $\beta$ (CH <sub>3</sub> )                 |
| 1257.24      | 1252.78        | 1.78E-02  | $\delta$ (HCOH)                                                           |
| 1268.00      | 1241.66        | 1.77E-03  | Bending H+ on Acetyl Oxygen, $\beta$ (HCCH), $\beta$ (CO)                 |
| 1269.57      | 1253.25        | 1.19E-01  | Bending H+ on Acetyl Oxygen, $\delta$ (HCOH)                              |
| 1281.81      | 1255.88        | 5.38E-03  | $\delta$ (HCOH), $\beta$ (CO), $\delta$ (HCCH), $\tau$ (CH <sub>2</sub> ) |
| 1284.99      | 1256.83        | 9.56E-02  | $\delta$ (HCCH), $\delta$ (HCOH)                                          |
| 1295.21      | 1265.17        | 3.58E-03  | $\delta$ (HCCH), $\delta$ (HCOH)                                          |

$\nu$ -stretching,  $\alpha$ s-asymmetric,  $s$ -symmetric,  $\beta$ -in-plane bending,  $\gamma$ -out-of-plane bending,  $\delta$ -scissoring,  $\tau$ -twisting

**Table S20: Vibrational mode assignment of [ $\alpha$ -bn16+H]<sup>+</sup> ion (<sup>2</sup>E).**

| Harmonic Vib | Anharmonic Vib | Intensity | Assignment                                                                          |
|--------------|----------------|-----------|-------------------------------------------------------------------------------------|
| 971.805      | 961.281        | 9.07E-03  | $\beta$ (HCOH), $\beta$ (HCCH), $\beta$ (CH <sub>3</sub> )                          |
| 977.303      | 948.905        | 6.34E-02  | Bending H+ on Acetyl Oxygen, $\beta$ (HCOH), $\beta$ (HCNH)                         |
| 980.302      | 964.713        | 6.68E-03  | $\beta$ (HCOH), $\beta$ (HCCH)                                                      |
| 1011.423     | 999.101        | 4.26E-02  | $\beta$ (HCCH), $\beta$ (CH <sub>3</sub> )                                          |
| 1014.167     | 1008.762       | 8.98E-03  | Bending H+ on Acetyl Oxygen, $\beta$ (CH <sub>3</sub> )                             |
| 1023.632     | 1025.062       | 1.80E-02  | Bending H+ on Acetyl Oxygen, $\beta$ (CH <sub>3</sub> )                             |
| 1048.423     | 1022.469       | 1.15E-02  | Bending H+ on Acetyl Oxygen, $\beta$ (CH <sub>3</sub> ), $\beta$ (CH <sub>2</sub> ) |
| 1050.178     | 1036.208       | 3.21E-02  | Bending H+ on Acetyl Oxygen, $\beta$ (CH <sub>3</sub> )                             |
| 1060.641     | 1036.002       | 2.91E-02  | Bending H+ on Acetyl Oxygen, $\beta$ (CH <sub>3</sub> ), $\beta$ (CH <sub>2</sub> ) |
| 1066.734     | 1037.735       | 3.34E-02  | Bending H+ on Acetyl Oxygen, $\beta$ (CH <sub>3</sub> )                             |
| 1071.021     | 1052.766       | 2.92E-02  | $\beta$ (HCOH), $\beta$ (HCCH)                                                      |
| 1078.053     | 1058.678       | 3.00E-02  | Bending H+ on Acetyl Oxygen, $\beta$ (HCOH)                                         |
| 1082.414     | 1068.65        | 7.46E-02  | Bending H+ on Acetyl Oxygen, $\beta$ (HCOH), $\nu$ (CC)                             |
| 1089.593     | 1083.523       | 8.53E-03  | $\beta$ (HCOH), $\beta$ (HCCH)                                                      |
| 1090.985     | 1076.915       | 2.04E-02  | Bending H+ on Acetyl Oxygen, $\beta$ (HCOH)                                         |
| 1101.082     | 1096.435       | 1.39E-02  | $\beta$ (HCOH), $\beta$ (HCCH)                                                      |
| 1103.588     | 1094.938       | 9.48E-03  | $\beta$ (HCOH), $\beta$ (HCCH)                                                      |
| 1111.954     | 1100.701       | 3.42E-02  | $\beta$ (HCOH), $\beta$ (HCCH), $\beta$ (HCNH), $\nu$ (COC) in glycosidic linkage   |
| 1113.506     | 1103.418       | 2.29E-02  | $\beta$ (HCOH), $\beta$ (HCCH), $\beta$ (CH <sub>2</sub> )                          |
| 1122.36      | 1108.867       | 3.22E-02  | $\nu$ (CO), $\beta$ (HCOH), $\beta$ (HCCH), $\beta$ (CH <sub>3</sub> )              |
| 1130.1       | 1110.532       | 2.89E-02  | $\beta$ (HCOH), $\beta$ (HCNH)                                                      |
| 1134.52      | 1118.977       | 7.70E-02  | $\nu$ (CO), $\beta$ (HCOH), $\beta$ (HCCH)                                          |
| 1136.434     | 1116.372       | 7.21E-02  | $\nu$ (CO), $\beta$ (HCOH), $\beta$ (HCCH)                                          |
| 1140.372     | 1128.981       | 1.34E-02  | $\nu$ (CO), $\beta$ (HCOH), $\beta$ (HCCH)                                          |
| 1146.014     | 1131.282       | 1.04E-01  | $\beta$ (HCOH), $\beta$ (HCNH)                                                      |
| 1155.089     | 1142.067       | 2.26E-02  | $\beta$ (HCOH), $\beta$ (HCCH), $\beta$ (CH <sub>3</sub> )                          |
| 1157.606     | 1138.233       | 2.87E-02  | $\nu$ (CC), $\beta$ (HCOH), $\beta$ (HCCH)                                          |
| 1162.666     | 1142.4         | 2.18E-02  | $\beta$ (HCOH), $\beta$ (HCCH), $\beta$ (CH <sub>2</sub> )                          |
| 1171.097     | 1153.593       | 1.60E-02  | $\beta$ (HCOH), $\beta$ (HCCH), $\beta$ (CH <sub>3</sub> )                          |
| 1173.981     | 1154.906       | 1.84E-02  | $\nu$ (CO), $\beta$ (HCOH), $\beta$ (HCCH)                                          |
| 1176.531     | 1166.003       | 1.65E-02  | $\nu$ (CO), $\beta$ (HCOH), $\beta$ (HCCH)                                          |
| 1186.325     | 1165.752       | 1.75E-02  | $\nu$ (CO), $\nu$ (CN), $\beta$ (HCOH), $\beta$ (HCCH)                              |
| 1192.927     | 1180.68        | 2.86E-02  | $\beta$ (HCOH), $\beta$ (HCCH), $\beta$ (CH <sub>3</sub> )                          |
| 1203.086     | 1191.04        | 2.90E-02  | $\nu$ (COC) in glycosidic linkage, $\beta$ (HCOH), $\beta$ (HCCH)                   |
| 1214.443     | 1197.407       | 1.86E-02  | $\nu$ (COC) in glycosidic linkage, $\beta$ (HCOH), $\beta$ (HCCH)                   |
| 1216.66      | 1204.155       | 5.46E-02  | $\nu$ (COC) in glycosidic linkage, $\beta$ (HCOH), $\beta$ (HCCH)                   |
| 1223.806     | 1219.54        | 5.91E-02  | $\beta$ (HCOH), $\beta$ (HCCH)                                                      |
| 1226.815     | 1217.44        | 4.79E-02  | $\beta$ (HCOH), $\beta$ (HCCH)                                                      |
| 1230.92      | 1215.355       | 1.23E-02  | $\beta$ (HCOH), $\beta$ (HCCH), $\beta$ (CH <sub>2</sub> )                          |
| 1254.998     | 1242.717       | 3.23E-02  | $\beta$ (HCOH), $\beta$ (HCCH)                                                      |
| 1257.243     | 1252.782       | 1.45E-02  | $\beta$ (HCOH), $\beta$ (HCCH)                                                      |
| 1268.001     | 1241.658       | 4.58E-03  | $\beta$ (HCOH), $\beta$ (HCCH), $\beta$ (HCNH)                                      |
| 1269.565     | 1253.25        | 3.75E-02  | $\beta$ (HCOH), $\beta$ (HCCH)                                                      |
| 1281.805     | 1255.879       | 7.98E-03  | $\beta$ (HCOH), $\beta$ (HCCH), $\beta$ (CH <sub>2</sub> )                          |
| 1284.993     | 1256.828       | 3.36E-02  | $\beta$ (HCOH), $\beta$ (HCCH), $\beta$ (HCNH)                                      |
| 1295.207     | 1265.168       | 6.51E-03  | $\beta$ (HCOH), $\beta$ (HCCH)                                                      |

$\nu$ -stretching, as-asymmetric, s-symmetric,  $\beta$ -in-plane bending,  $\gamma$ -out-of-plane bending,  $\delta$ -scissoring,  $\tau$ -twisting

**Table S21:** Vibrational mode assignment of [ $\beta$ -bn16+H]<sup>+</sup> ion (E').

| Harmonic Vib | Anharmonic Vib | Intensity | Assignment                                                                                       |
|--------------|----------------|-----------|--------------------------------------------------------------------------------------------------|
| 970.00       | 955.97         | 3.97E-02  | $\tau$ (CH <sub>2</sub> ), $\delta$ (HCOH), $\beta$ (CH <sub>3</sub> )                           |
| 972.52       | 958.34         | 1.36E-01  | $\tau$ (CH <sub>2</sub> ), $\delta$ (HCOH), $\beta$ (CH <sub>3</sub> )                           |
| 995.16       | 980.07         | 8.52E-02  | $\delta$ (HCOH), $\delta$ (HCCH)                                                                 |
| 1005.34      | 993.56         | 6.07E-03  | $\tau$ (CH <sub>2</sub> ), $\beta$ (CO), $\beta$ (CH <sub>3</sub> ), Bending H+ on Acetyl Oxygen |
| 1016.26      | 1007.32        | 1.18E-01  | $\delta$ (HCCH), $\beta$ (CH <sub>3</sub> )                                                      |
| 1019.88      | 1013.40        | 8.94E-02  | $\delta$ (HCCH), $\beta$ (CH <sub>3</sub> )                                                      |
| 1054.11      | 1050.13        | 9.04E-02  | $\beta$ (CH <sub>3</sub> ), $\beta$ (CO)                                                         |
| 1060.37      | 1058.93        | 2.32E-01  | $\beta$ (CH <sub>3</sub> ), $\beta$ (CO)                                                         |
| 1071.84      | 1064.23        | 9.06E-01  | $\beta$ (CH <sub>3</sub> )                                                                       |
| 1074.32      | 1068.92        | 1.16E-01  | $\beta$ (CH <sub>3</sub> ), $\beta$ (CO)                                                         |
| 1077.41      | 1058.79        | 8.53E-01  | $\beta$ (CH <sub>3</sub> ), $\beta$ (CO), $\nu$ (HCCH <sub>3</sub> )                             |
| 1081.75      | 1069.76        | 2.94E-01  | $\beta$ (CO), $\delta$ (HCOH), $\nu$ as(COC), $\nu$ (CC)                                         |
| 1089.95      | 1073.09        | 2.00E-01  | $\beta$ (CO), $\delta$ (HCOH), $\nu$ (CC), $\nu$ (CO)                                            |
| 1094.16      | 1080.43        | 3.47E-02  | $\beta$ (CH <sub>3</sub> ), $\nu$ (HCCH), $\delta$ (HCOH)                                        |
| 1101.23      | 1092.60        | 4.53E-01  | $\nu$ (HCCH), $\delta$ (HCOH)                                                                    |
| 1104.92      | 1100.65        | 8.18E-02  | $\nu$ (HCCH), $\delta$ (HCOH)                                                                    |
| 1108.69      | 1097.97        | 3.01E-01  | $\nu$ as(COC) in glycosidic linkage, $\delta$ (HCOH)                                             |
| 1116.80      | 1099.51        | 2.57E-01  | $\nu$ as(COC), $\beta$ (CC)                                                                      |
| 1126.79      | 1112.92        | 8.00E-02  | $\beta$ (CO), $\nu$ (HCCH)                                                                       |
| 1131.29      | 1115.61        | 1.95E-01  | $\nu$ (CO), $\beta$ (CO)                                                                         |
| 1138.88      | 1125.85        | 1.48E-02  | $\nu$ (CO), $\beta$ (CO)                                                                         |
| 1139.56      | 1127.00        | 7.51E-02  | $\nu$ (CO), $\beta$ (CO)                                                                         |
| 1145.96      | 1129.61        | 4.53E-03  | $\beta$ (CO), $\nu$ (HCCH)                                                                       |
| 1150.42      | 1138.41        | 7.72E-02  | $\beta$ (CH <sub>3</sub> ), $\beta$ (CO), $\nu$ (HCCH)                                           |
| 1153.32      | 1138.51        | 6.55E-02  | $\nu$ (HCCH), $\delta$ (HCOH)                                                                    |
| 1156.95      | 1144.14        | 3.72E-02  | $\nu$ (HCCH), $\delta$ (HCOH)                                                                    |
| 1163.36      | 1148.81        | 3.93E-01  | $\nu$ as(COC), $\delta$ (HCOH), $\nu$ (CO)                                                       |
| 1164.61      | 1149.10        | 5.69E-01  | $\nu$ (NC), $\nu$ (CO)                                                                           |
| 1170.28      | 1151.01        | 1.40E-01  | $\delta$ (HCCH), $\nu$ (CO)                                                                      |
| 1174.63      | 1163.63        | 6.27E-02  | $\delta$ (HCOH), $\beta$ (CH <sub>3</sub> )                                                      |
| 1179.32      | 1162.55        | 8.03E-02  | $\delta$ (HCCH), $\nu$ (CO), $\delta$ (HCOH)                                                     |
| 1181.39      | 1170.92        | 1.14E-01  | $\delta$ (HCCH), $\nu$ (CO), $\delta$ (HCOH)                                                     |
| 1192.11      | 1177.14        | 7.74E-03  | $\delta$ (HCCH), $\beta$ (CH <sub>3</sub> ), $\delta$ (HCOH)                                     |
| 1208.01      | 1188.28        | 6.60E-02  | $\delta$ (HCCH), $\nu$ (CO)                                                                      |
| 1215.86      | 1199.87        | 7.98E-02  | $\delta$ (HCOH), $\nu$ as(COC) in glycosidic linkage                                             |
| 1221.57      | 1214.91        | 2.61E-01  | $\delta$ (HCOH), $\delta$ (HCCH)                                                                 |
| 1223.91      | 1218.92        | 4.12E-02  | $\delta$ (HCOH), $\delta$ (HCCH)                                                                 |
| 1231.65      | 1204.48        | 7.28E-02  | $\delta$ (HCOH), $\delta$ (HCCH)                                                                 |
| 1241.62      | 1224.50        | 6.54E-01  | $\delta$ (HCOH), $\delta$ (HCCH), $\beta$ (CH <sub>2</sub> )                                     |
| 1255.87      | 1252.07        | 5.24E-02  | $\delta$ (HCOH), $\delta$ (HCCH), $\beta$ (CH <sub>3</sub> )                                     |
| 1258.77      | 1240.61        | 9.64E-02  | $\delta$ (HCOH), $\delta$ (HCCH)                                                                 |
| 1263.25      | 1251.27        | 1.52E-01  | $\delta$ (HCOH), $\delta$ (HCCH)                                                                 |
| 1269.30      | 1241.72        | 3.41E-02  | $\delta$ (HCOH), $\delta$ (HCCH)                                                                 |
| 1281.94      | 1256.03        | 1.16E-02  | $\delta$ (HCOH), $\delta$ (HCCH)                                                                 |
| 1290.75      | 1264.67        | 1.65E-01  | $\delta$ (HCOH), $\delta$ (HCCH), $\tau$ (CH <sub>2</sub> )                                      |
| 1295.87      | 1267.31        | 1.25E-01  | $\delta$ (HCOH), $\beta$ (HCCH)                                                                  |

$\nu$ -stretching,  $\alpha$ -asymmetric,  $s$ -symmetric,  $\beta$ -in-plane bending,  $\gamma$ -out-of-plane bending,  $\delta$ -scissoring,  $t$ -twisting

**Table S22:** XYZ-coordinates of [ $\alpha$ -BG-H1+H]<sup>+</sup> ion (A).

|   |           |           |           |
|---|-----------|-----------|-----------|
| C | -3.457437 | 1.818169  | -0.806872 |
| H | -2.945627 | 2.451034  | -1.539870 |
| O | -4.781088 | 1.612472  | -1.101698 |
| H | -5.198382 | 2.456838  | -1.298909 |
| C | -2.068572 | 2.903283  | 0.867448  |
| H | -1.992249 | 2.687992  | 1.937396  |
| O | -3.388699 | 2.484435  | 0.463582  |
| C | -2.746547 | 0.479936  | -0.709061 |
| H | -2.673260 | 0.076373  | -1.718318 |
| N | -3.480493 | -0.537708 | 0.054180  |
| H | -3.317357 | -1.509253 | -0.254693 |
| C | -4.221031 | -0.436552 | 1.129462  |
| O | -4.467154 | 0.656196  | 1.759005  |
| C | -4.842358 | -1.651440 | 1.715005  |
| H | -4.752681 | -2.516439 | 1.061782  |
| H | -5.893744 | -1.434340 | 1.913202  |
| H | -4.367626 | -1.858004 | 2.678749  |
| C | -1.297689 | 0.679863  | -0.186604 |
| H | -1.163111 | 0.073105  | 0.715676  |
| O | 0.135054  | 2.197081  | 1.038527  |
| H | 0.973339  | 2.013848  | 0.576609  |
| C | -0.951116 | 2.131268  | 0.159385  |
| H | -0.723003 | 2.633087  | -0.789891 |
| O | -0.353298 | 0.328891  | -1.187205 |
| C | -1.942018 | 4.393544  | 0.653838  |
| H | -0.961611 | 4.709895  | 1.030645  |
| H | -2.726946 | 4.902305  | 1.225539  |
| O | -2.079680 | 4.634228  | -0.733979 |
| H | -2.031651 | 5.577206  | -0.900706 |
| C | 0.011103  | -1.011468 | -1.289610 |
| H | 0.539432  | -1.089098 | -2.249992 |
| C | -0.982709 | -3.182584 | -1.415200 |
| H | -0.488078 | -3.419421 | -2.370066 |
| O | -1.166572 | -1.779548 | -1.303137 |
| C | 0.945315  | -1.459627 | -0.170392 |
| H | 0.501505  | -1.214274 | 0.801734  |
| O | 2.187854  | -0.812924 | -0.329295 |
| C | 1.201370  | -2.959641 | -0.220027 |
| H | 1.790463  | -3.173741 | -1.125302 |
| O | 1.862515  | -3.400401 | 0.933603  |
| H | 2.672879  | -2.875485 | 1.071289  |
| C | -0.106214 | -3.728870 | -0.297489 |
| H | 0.114273  | -4.782708 | -0.515248 |
| O | -0.797793 | -3.627283 | 0.937873  |
| H | -0.148921 | -3.802477 | 1.631745  |
| C | -2.378974 | -3.781413 | -1.433887 |
| H | -2.309316 | -4.874884 | -1.469819 |
| H | -2.912719 | -3.444872 | -2.324729 |
| O | -3.137951 | -3.356229 | -0.314820 |
| H | -2.600913 | -3.574600 | 0.464535  |
| C | 2.642355  | 0.037286  | 0.684469  |
| H | 1.986419  | -0.021738 | 1.558697  |
| C | 3.436501  | 1.685933  | -0.859083 |
| H | 3.091513  | 1.080051  | -1.706870 |
| O | 2.611242  | 1.378562  | 0.274938  |
| C | 4.063946  | -0.357303 | 1.047367  |
| H | 4.384160  | 0.285860  | 1.876181  |
| O | 4.063753  | -1.712813 | 1.447903  |
| H | 4.983107  | -2.004701 | 1.461059  |
| C | 4.988448  | -0.138819 | -0.140895 |
| H | 4.670076  | -0.795871 | -0.955347 |

|   |           |           |           |
|---|-----------|-----------|-----------|
| O | 6.301035  | -0.516335 | 0.195998  |
| H | 6.687308  | 0.223813  | 0.680544  |
| C | 4.895939  | 1.310645  | -0.596343 |
| H | 5.452563  | 1.421964  | -1.536679 |
| O | 5.499684  | 2.073084  | 0.432969  |
| H | 5.767298  | 2.929932  | 0.096071  |
| C | 3.236065  | 3.152622  | -1.154745 |
| H | 3.505068  | 3.759562  | -0.286645 |
| H | 2.191544  | 3.354059  | -1.402657 |
| H | 3.846968  | 3.456096  | -2.009274 |
| H | -4.056727 | 1.478527  | 1.319589  |

**Table S23:** XYZ-coordinates of [ $\alpha$ -BG-H1+H]<sup>+</sup> ion (Å).

|   |           |           |           |
|---|-----------|-----------|-----------|
| C | -3.777383 | 2.184448  | 0.678761  |
| H | -4.837487 | 1.967781  | 0.510793  |
| O | -3.561533 | 2.690759  | 1.968323  |
| H | -4.153937 | 3.431775  | 2.124078  |
| C | -2.043010 | 3.469502  | -0.345746 |
| H | -1.800612 | 4.008710  | 0.577960  |
| O | -3.416405 | 3.065247  | -0.333744 |
| C | -2.947614 | 0.903243  | 0.588832  |
| H | -3.196736 | 0.376525  | -0.330819 |
| N | -3.237802 | 0.012458  | 1.701159  |
| H | -2.991446 | 0.355264  | 2.620652  |
| C | -3.610311 | -1.236416 | 1.583034  |
| O | -4.053682 | -1.636142 | 0.454589  |
| C | -3.516724 | -2.159892 | 2.742194  |
| H | -4.451573 | -2.711529 | 2.856459  |
| H | -3.274157 | -1.640904 | 3.669271  |
| H | -2.719836 | -2.882372 | 2.533408  |
| C | -1.458714 | 1.259384  | 0.629029  |
| H | -1.242660 | 1.734784  | 1.592161  |
| O | 0.197445  | 2.733553  | -0.321664 |
| H | 0.789299  | 2.058023  | 0.044803  |
| C | -1.115485 | 2.260067  | -0.456762 |
| H | -1.275752 | 1.818370  | -1.451599 |
| O | -0.616453 | 0.113737  | 0.639845  |
| C | -1.890909 | 4.398783  | -1.533806 |
| H | -0.847673 | 4.712464  | -1.598446 |
| H | -2.511152 | 5.289013  | -1.372419 |
| O | -2.210199 | 3.758028  | -2.745990 |
| H | -3.157224 | 3.599123  | -2.752721 |
| C | -0.428593 | -0.642717 | -0.513287 |
| H | -0.287103 | -0.009289 | -1.401568 |
| C | -1.422709 | -2.449363 | -1.701765 |
| H | -1.217301 | -1.976504 | -2.675319 |
| O | -1.560524 | -1.466023 | -0.690366 |
| C | 0.830160  | -1.453657 | -0.248894 |
| H | 0.754987  | -1.844145 | 0.773143  |
| O | 1.960149  | -0.625993 | -0.392817 |
| C | 1.019342  | -2.624943 | -1.195009 |
| H | 1.340448  | -2.230933 | -2.171250 |
| O | 1.960753  | -3.529828 | -0.680783 |
| H | 2.646911  | -3.035759 | -0.195423 |
| C | -0.275490 | -3.397453 | -1.390499 |
| H | -0.150505 | -4.091921 | -2.232271 |
| O | -0.600005 | -4.122397 | -0.213972 |
| H | 0.223288  | -4.522924 | 0.098084  |
| C | -2.757680 | -3.165527 | -1.811586 |
| H | -2.685524 | -3.979090 | -2.538658 |
| H | -3.534230 | -2.473752 | -2.140902 |

|   |           |           |           |
|---|-----------|-----------|-----------|
| O | -3.192730 | -3.690829 | -0.551189 |
| H | -2.416983 | -4.129116 | -0.150126 |
| C | 2.503998  | -0.061404 | 0.780398  |
| H | 1.839252  | -0.255283 | 1.625890  |
| C | 3.492884  | 1.825427  | -0.328880 |
| H | 3.146903  | 1.492905  | -1.317012 |
| O | 2.571607  | 1.325426  | 0.659631  |
| C | 3.876484  | -0.670403 | 1.021190  |
| H | 4.239247  | -0.307081 | 1.990230  |
| O | 3.735671  | -2.081320 | 1.047637  |
| H | 4.630982  | -2.441044 | 1.068971  |
| C | 4.853839  | -0.251613 | -0.063576 |
| H | 4.506506  | -0.649641 | -1.021659 |
| O | 6.115748  | -0.824900 | 0.183860  |
| H | 6.556928  | -0.255491 | 0.826339  |
| C | 4.901265  | 1.264174  | -0.135148 |
| H | 5.504303  | 1.562051  | -1.003788 |
| O | 5.523487  | 1.679585  | 1.067286  |
| H | 5.810770  | 2.591341  | 0.990634  |
| C | 3.444018  | 3.332726  | -0.244094 |
| H | 2.440521  | 3.699284  | -0.463821 |
| H | 4.133489  | 3.772068  | -0.970632 |
| H | 3.717906  | 3.667280  | 0.759911  |
| H | -3.756068 | -2.604596 | 0.166031  |

**Table S24:** XYZ-coordinates of [ $\beta$ -BG-H1+H]<sup>+</sup> ion (Å).

|   |           |           |           |
|---|-----------|-----------|-----------|
| C | 3.513637  | 1.805175  | 0.811557  |
| H | 4.593648  | 1.671357  | 0.962299  |
| O | 2.927519  | 2.512694  | 1.828957  |
| H | 2.888813  | 3.455741  | 1.587051  |
| C | 2.114278  | 2.822479  | -0.925238 |
| H | 2.083009  | 2.521116  | -1.977596 |
| O | 3.435884  | 2.480588  | -0.445098 |
| C | 2.791494  | 0.464931  | 0.721455  |
| H | 2.715409  | 0.081556  | 1.737960  |
| N | 3.533776  | -0.558232 | -0.028593 |
| H | 3.346609  | -1.533697 | 0.260990  |
| C | 4.295036  | -0.453930 | -1.088540 |
| O | 4.571802  | 0.648811  | -1.695431 |
| C | 4.914065  | -1.665347 | -1.682239 |
| H | 5.964842  | -1.450725 | -1.885936 |
| H | 4.433679  | -1.865010 | -2.645007 |
| H | 4.821873  | -2.534153 | -1.034248 |
| C | 1.344587  | 0.645129  | 0.186093  |
| H | 1.227825  | 0.019578  | -0.706720 |
| O | -0.072844 | 2.088735  | -1.133195 |
| H | -0.922513 | 1.941270  | -0.680619 |
| C | 0.983884  | 2.079846  | -0.211142 |
| H | 0.717027  | 2.609121  | 0.708161  |
| O | 0.389899  | 0.299599  | 1.175722  |
| C | 1.963841  | 4.325674  | -0.861157 |
| H | 0.984575  | 4.588947  | -1.275713 |
| H | 2.750673  | 4.787186  | -1.467407 |
| O | 2.073118  | 4.724692  | 0.496864  |
| H | 2.088767  | 5.682102  | 0.556189  |
| C | 0.031993  | -1.039982 | 1.281288  |
| H | -0.496061 | -1.119457 | 2.241572  |
| C | 1.032577  | -3.208070 | 1.414410  |
| H | 0.540712  | -3.442540 | 2.371131  |

|   |           |           |           |
|---|-----------|-----------|-----------|
| O | 1.212494  | -1.805461 | 1.295655  |
| C | -0.897074 | -1.496280 | 0.160709  |
| H | -0.451004 | -1.253768 | -0.810959 |
| O | -2.141406 | -0.848394 | 0.313550  |
| C | -1.152383 | -2.995877 | 0.219318  |
| H | -1.739698 | -3.205405 | 1.126579  |
| O | -1.815232 | -3.444476 | -0.930761 |
| H | -2.645637 | -2.948225 | -1.047477 |
| C | 0.156499  | -3.762309 | 0.299948  |
| H | -0.061654 | -4.815452 | 0.522704  |
| O | 0.848567  | -3.665494 | -0.936175 |
| H | 0.204125  | -3.855709 | -1.629920 |
| C | 2.431261  | -3.801027 | 1.432175  |
| H | 2.368717  | -4.894751 | 1.465968  |
| H | 2.964500  | -3.462371 | 2.322405  |
| O | 3.186024  | -3.369571 | 0.311188  |
| H | 2.649275  | -3.594612 | -0.466794 |
| C | -2.610359 | -0.034890 | -0.716314 |
| H | -1.973088 | -0.123735 | -1.601844 |
| C | -3.334647 | 1.640875  | 0.833824  |
| H | -2.989939 | 0.984205  | 1.640149  |
| O | -2.570523 | 1.327299  | -0.352355 |
| C | -4.044652 | -0.426601 | -1.035021 |
| H | -4.362322 | 0.170777  | -1.901245 |
| O | -4.074800 | -1.796976 | -1.372256 |
| H | -4.999623 | -2.071370 | -1.372303 |
| C | -4.959329 | -0.121490 | 0.143045  |
| H | -4.677384 | -0.772180 | 0.977105  |
| O | -6.286591 | -0.442506 | -0.195272 |
| H | -6.655721 | 0.324905  | -0.650453 |
| C | -4.803220 | 1.338086  | 0.564189  |
| H | -5.378440 | 1.505187  | 1.479888  |
| O | -5.373857 | 2.187629  | -0.414126 |
| H | -4.723935 | 2.340383  | -1.107235 |
| C | -3.050814 | 3.081219  | 1.180465  |
| H | -3.350052 | 3.751298  | 0.371859  |
| H | -1.986267 | 3.220586  | 1.382543  |
| H | -3.607666 | 3.362998  | 2.076954  |
| H | 4.136005  | 1.469444  | -1.280975 |

**Table S25:** XYZ-coordinates of [ $\beta$ -BG-H1+H]<sup>+</sup> ion (Å).

|   |           |           |           |
|---|-----------|-----------|-----------|
| C | 3.010512  | -2.399101 | -0.483986 |
| H | 2.447526  | -3.149361 | -1.044940 |
| O | 3.794867  | -3.132753 | 0.442875  |
| H | 4.447819  | -2.499979 | 0.817963  |
| C | 4.216580  | -0.398833 | -1.124573 |
| H | 4.468884  | 0.016046  | -2.102521 |
| O | 3.756629  | -1.717783 | -1.420717 |
| C | 2.033442  | -1.489945 | 0.296811  |
| H | 2.515847  | -1.192598 | 1.237298  |
| N | 0.815041  | -2.212444 | 0.636762  |
| H | -0.095592 | -1.869644 | 0.267944  |
| C | 0.769454  | -3.255781 | 1.425105  |
| O | 1.824159  | -3.820324 | 1.907318  |
| C | -0.527855 | -3.844932 | 1.831181  |
| H | -1.371904 | -3.375179 | 1.328734  |
| H | -0.627729 | -3.734112 | 2.915279  |
| H | -0.509979 | -4.916505 | 1.620390  |
| C | 1.771105  | -0.215973 | -0.489905 |
| H | 1.418883  | -0.436997 | -1.506919 |
| O | 3.090601  | 1.657019  | -1.356832 |

|   |           |           |           |
|---|-----------|-----------|-----------|
| H | 2.507546  | 2.298815  | -0.920468 |
| C | 3.117523  | 0.513361  | -0.548405 |
| H | 3.362112  | 0.781256  | 0.490259  |
| O | 0.780321  | 0.514686  | 0.214400  |
| C | 5.486681  | -0.406643 | -0.303295 |
| H | 5.846023  | 0.624244  | -0.215873 |
| H | 6.243827  | -1.012203 | -0.811345 |
| O | 5.205507  | -0.946470 | 0.991277  |
| H | 5.975818  | -0.850953 | 1.557200  |
| C | 0.195960  | 1.607801  | -0.419881 |
| H | 0.189996  | 1.460717  | -1.512355 |
| C | 0.402776  | 3.984675  | -0.596631 |
| H | 0.310601  | 3.929367  | -1.693602 |
| O | 0.960643  | 2.762240  | -0.103973 |
| C | -1.223931 | 1.751351  | 0.104412  |
| H | -1.180881 | 1.737828  | 1.199594  |
| O | -2.031115 | 0.706526  | -0.387422 |
| C | -1.889091 | 3.047524  | -0.341155 |
| H | -2.067530 | 2.997527  | -1.420793 |
| O | -3.148413 | 3.168600  | 0.276304  |
| H | -3.000862 | 3.598765  | 1.129342  |
| C | -0.990075 | 4.228799  | -0.020027 |
| H | -1.397214 | 5.132536  | -0.497637 |
| O | -1.018879 | 4.345635  | 1.382549  |
| H | -0.292118 | 4.921828  | 1.659034  |
| C | 1.397418  | 5.082810  | -0.265296 |
| H | 1.037252  | 6.025656  | -0.683291 |
| H | 2.364572  | 4.860107  | -0.732102 |
| O | 1.538500  | 5.286102  | 1.127747  |
| H | 2.021972  | 4.542602  | 1.497625  |
| C | -2.220508 | -0.410691 | 0.433059  |
| H | -1.683313 | -0.280632 | 1.377567  |
| C | -2.296800 | -1.966194 | -1.406406 |
| H | -2.228425 | -1.129888 | -2.111903 |
| O | -1.665459 | -1.552567 | -0.173271 |
| C | -3.711077 | -0.583707 | 0.693630  |
| H | -3.829982 | -1.373158 | 1.441523  |
| O | -4.267624 | 0.580088  | 1.244278  |
| H | -4.006722 | 1.348647  | 0.709716  |
| C | -4.437899 | -1.024597 | -0.568565 |
| H | -4.401879 | -0.212402 | -1.310145 |
| O | -5.769063 | -1.378378 | -0.278590 |
| H | -6.143980 | -0.691024 | 0.282087  |
| C | -3.765529 | -2.256899 | -1.157486 |
| H | -4.235488 | -2.486503 | -2.125177 |
| O | -3.865777 | -3.355400 | -0.281329 |
| H | -4.792348 | -3.417961 | -0.023164 |
| C | -1.528715 | -3.157327 | -1.925423 |
| H | -1.599704 | -3.994429 | -1.228562 |
| H | -0.478622 | -2.902741 | -2.092903 |
| H | -1.950098 | -3.478988 | -2.880231 |
| H | 2.691397  | -3.555542 | 1.449153  |

**Table S26:** XYZ-coordinates of [ $\alpha$ -Le<sup>a</sup>+H]<sup>+</sup> ion (B).

|   |           |          |           |
|---|-----------|----------|-----------|
| C | -1.074992 | 3.127270 | -0.746336 |
| H | -0.410356 | 3.172352 | -1.616077 |
| O | -2.091064 | 4.044844 | -0.803183 |
| H | -1.731723 | 4.908226 | -1.031189 |
| C | 0.890916  | 2.595853 | 0.593936  |



|   |           |           |           |
|---|-----------|-----------|-----------|
| H | 0.900325  | 2.298402  | 1.648730  |
| O | -0.287884 | 3.414148  | 0.420040  |
| C | -1.668333 | 1.730386  | -0.620870 |
| H | -2.095387 | 1.472290  | -1.589045 |
| N | -2.787917 | 1.648809  | 0.323013  |
| H | -3.532570 | 0.980933  | 0.062080  |
| C | -2.961876 | 2.220236  | 1.487885  |
| O | -2.127660 | 3.019449  | 2.051402  |
| C | -4.194874 | 1.944951  | 2.268108  |
| H | -4.565317 | 2.889717  | 2.669176  |
| H | -3.936578 | 1.308501  | 3.119986  |
| H | -4.962294 | 1.463898  | 1.665734  |
| C | -0.551962 | 0.686620  | -0.322719 |
| H | -0.757979 | 0.202107  | 0.638750  |
| O | -0.447934 | -0.268231 | -1.365738 |
| C | 0.828479  | 1.337763  | -0.267802 |
| H | 1.104018  | 1.601965  | -1.295022 |
| O | 1.795398  | 0.468978  | 0.275448  |
| C | 2.124043  | 3.430343  | 0.290283  |
| H | 3.004093  | 2.910267  | 0.682015  |
| H | 2.025020  | 4.384415  | 0.815405  |
| O | 2.245624  | 3.687479  | -1.085024 |
| H | 2.843197  | 3.015963  | -1.440549 |
| C | -1.342727 | -1.343378 | -1.376940 |
| H | -1.215771 | -1.797013 | -2.369576 |
| C | -3.692326 | -1.764233 | -1.278982 |
| H | -3.703386 | -2.253395 | -2.265254 |
| O | -2.638140 | -0.815249 | -1.226214 |
| C | -1.049300 | -2.394610 | -0.308484 |
| H | -1.057997 | -1.919014 | 0.682874  |
| O | 0.150485  | -3.074191 | -0.551449 |
| H | 0.924190  | -2.511034 | -0.374254 |
| C | -2.134929 | -3.460266 | -0.335625 |
| H | -2.055462 | -3.996042 | -1.293765 |
| O | -1.995193 | -4.352154 | 0.743512  |
| H | -1.089997 | -4.679761 | 0.736388  |
| C | -3.520554 | -2.854577 | -0.230718 |
| H | -4.266778 | -3.637295 | -0.422288 |
| O | -3.722728 | -2.305606 | 1.063468  |
| H | -3.457350 | -2.979181 | 1.701078  |
| C | -4.977157 | -0.969658 | -1.121318 |
| H | -5.834062 | -1.653157 | -1.114309 |
| H | -5.094011 | -0.286364 | -1.964502 |
| O | -4.951481 | -0.174596 | 0.052536  |
| H | -4.762954 | -0.790100 | 0.779713  |
| C | 2.486143  | -0.363035 | -0.632245 |
| H | 1.951089  | -0.402983 | -1.582713 |
| C | 3.152505  | -1.826696 | 1.149653  |
| H | 2.685390  | -1.129322 | 1.854142  |
| O | 2.491476  | -1.673774 | -0.131294 |
| C | 3.923234  | 0.093917  | -0.832468 |
| H | 4.358921  | -0.580262 | -1.584055 |
| O | 3.951858  | 1.417383  | -1.327227 |
| H | 4.878111  | 1.689901  | -1.300581 |
| C | 4.724233  | -0.023553 | 0.454495  |
| H | 4.316577  | 0.680608  | 1.187652  |
| O | 6.055450  | 0.361929  | 0.212335  |
| H | 6.523721  | -0.421859 | -0.102933 |
| C | 4.618868  | -1.442686 | 1.004558  |
| H | 5.094151  | -1.478495 | 1.989667  |
| O | 5.353256  | -2.332801 | 0.186291  |
| H | 4.798004  | -2.616099 | -0.546810 |
| C | 2.932485  | -3.249583 | 1.600109  |

|   |           |           |          |
|---|-----------|-----------|----------|
| H | 3.366313  | -3.961023 | 0.894632 |
| H | 1.865825  | -3.460900 | 1.696232 |
| H | 3.406301  | -3.404767 | 2.571970 |
| H | -1.322837 | 3.245606  | 1.469265 |

**Table S27:** XYZ-coordinates of [ $\alpha$ -Le<sup>3</sup>+H]<sup>+</sup> ion (<sup>2</sup>B).

|   |           |           |           |
|---|-----------|-----------|-----------|
| C | -1.114720 | 3.450734  | -0.222555 |
| H | -1.927766 | 4.039568  | -0.656353 |
| O | -0.783504 | 3.962273  | 1.068269  |
| H | -0.617626 | 4.910124  | 1.018698  |
| C | 1.130197  | 2.850995  | -0.680074 |
| H | 1.451747  | 3.244255  | 0.291762  |
| O | -0.054060 | 3.549639  | -1.092627 |
| C | -1.537398 | 1.987871  | -0.072195 |
| H | -1.815342 | 1.688232  | -1.081917 |
| N | -2.747042 | 1.734228  | 0.719188  |
| H | -3.403068 | 1.065738  | 0.287309  |
| C | -2.987373 | 1.985393  | 1.979515  |
| O | -2.238363 | 2.724275  | 2.725162  |
| C | -4.175914 | 1.394208  | 2.636893  |
| H | -4.628771 | 2.134446  | 3.297281  |
| H | -3.841408 | 0.555549  | 3.256511  |
| H | -4.898043 | 1.036076  | 1.905095  |
| C | -0.352562 | 1.111311  | 0.373719  |
| H | -0.050020 | 1.386911  | 1.389096  |
| O | -0.696278 | -0.255564 | 0.497321  |
| C | 0.839365  | 1.361700  | -0.542645 |
| H | 0.644077  | 0.978449  | -1.551569 |
| O | 2.015899  | 0.785793  | -0.019206 |
| C | 2.226595  | 3.116032  | -1.705612 |
| H | 3.190978  | 3.001513  | -1.202170 |
| H | 2.129787  | 4.156794  | -2.030588 |
| O | 2.143709  | 2.273878  | -2.824052 |
| H | 2.830063  | 1.600125  | -2.719148 |
| C | -1.190099 | -0.961430 | -0.605247 |
| H | -0.542968 | -0.844101 | -1.488721 |
| C | -3.381213 | -1.200168 | -1.663393 |
| H | -3.052129 | -1.243104 | -2.712207 |
| O | -2.467819 | -0.443086 | -0.886253 |
| C | -1.216875 | -2.420235 | -0.167564 |
| H | -1.608132 | -2.433998 | 0.858653  |
| O | 0.053207  | -3.008185 | -0.247427 |
| H | 0.699805  | -2.497247 | 0.268197  |
| C | -2.133184 | -3.255294 | -1.043183 |
| H | -1.691752 | -3.324788 | -2.049235 |
| O | -2.316334 | -4.536198 | -0.490467 |
| H | -1.448441 | -4.901235 | -0.289814 |
| C | -3.507908 | -2.624927 | -1.156589 |
| H | -4.100427 | -3.196835 | -1.883509 |
| O | -4.166040 | -2.610146 | 0.098787  |
| H | -4.104746 | -3.498929 | 0.467554  |
| C | -4.684200 | -0.411190 | -1.578215 |
| H | -5.503893 | -1.000328 | -2.004682 |
| H | -4.597870 | 0.512864  | -2.154217 |
| O | -4.960567 | -0.032883 | -0.240843 |
| H | -4.977325 | -0.862013 | 0.262048  |
| C | 2.388217  | -0.488435 | -0.461653 |
| H | 1.772131  | -0.796823 | -1.311986 |
| C | 2.903954  | -1.211179 | 1.762230  |
| H | 2.641033  | -0.204909 | 2.107614  |
| O | 2.186306  | -1.462129 | 0.535431  |
| C | 3.860514  | -0.487672 | -0.843534 |

|   |           |           |           |
|---|-----------|-----------|-----------|
| H | 4.081659  | -1.491640 | -1.234106 |
| O | 4.091493  | 0.468232  | -1.852613 |
| H | 5.047932  | 0.560189  | -1.939685 |
| C | 4.733131  | -0.230906 | 0.376961  |
| H | 4.537161  | 0.783919  | 0.738282  |
| O | 6.088516  | -0.277960 | 0.002572  |
| H | 6.360642  | -1.203675 | 0.045192  |
| C | 4.400640  | -1.237309 | 1.476772  |
| H | 4.944527  | -0.962724 | 2.385718  |
| O | 4.875221  | -2.520733 | 1.114811  |
| H | 4.223093  | -2.945382 | 0.548627  |
| C | 2.445546  | -2.241001 | 2.764672  |
| H | 2.675832  | -3.253909 | 2.427629  |
| H | 1.368410  | -2.158591 | 2.925699  |
| H | 2.950921  | -2.081375 | 3.719814  |
| H | -1.562151 | 3.238603  | 2.194067  |

**Table S28:** XYZ-coordinates of [ $\beta$ -Le<sup>a</sup>+H]<sup>+</sup> ion (B').

|   |           |           |           |
|---|-----------|-----------|-----------|
| C | 1.511538  | -2.713679 | 1.043008  |
| H | 2.469286  | -2.680219 | 1.567766  |
| O | 1.392392  | -4.041874 | 0.571502  |
| H | 0.461648  | -4.193139 | 0.287077  |
| C | -0.727029 | -1.975791 | 1.557801  |
| H | -1.108977 | -1.349878 | 2.368693  |
| O | 0.583200  | -2.342320 | 1.987778  |
| C | 1.569141  | -1.753647 | -0.181634 |
| H | 1.142295  | -2.273888 | -1.048342 |
| N | 2.956888  | -1.464257 | -0.498481 |
| H | 3.276289  | -0.488704 | -0.441503 |
| C | 3.797321  | -2.387736 | -0.879119 |
| O | 3.478263  | -3.639224 | -0.941606 |
| C | 5.173554  | -2.034970 | -1.293844 |
| H | 5.849010  | -2.850247 | -1.036023 |
| H | 5.488979  | -1.107598 | -0.815473 |
| H | 5.191054  | -1.912782 | -2.381828 |
| C | 0.697653  | -0.524753 | 0.052314  |
| H | 1.050126  | 0.040889  | 0.919808  |
| O | 0.622098  | 0.284856  | -1.107915 |
| C | -0.694366 | -1.114386 | 0.291313  |
| H | -0.908422 | -1.734140 | -0.585810 |
| O | -1.696856 | -0.137330 | 0.413688  |
| C | -1.620721 | -3.196129 | 1.421849  |
| H | -2.666275 | -2.883403 | 1.385358  |
| H | -1.473336 | -3.840213 | 2.290868  |
| O | -1.297464 | -3.958342 | 0.265325  |
| H | -1.839512 | -3.622426 | -0.460038 |
| C | 1.262179  | 1.529216  | -1.067749 |
| H | 1.107492  | 1.956546  | -2.066244 |
| C | 3.488123  | 2.371836  | -0.645709 |
| H | 3.493885  | 3.013928  | -1.539147 |
| O | 2.630703  | 1.258932  | -0.851579 |
| C | 0.667233  | 2.482253  | -0.022387 |
| H | 0.520366  | 1.941846  | 0.921120  |
| O | -0.533740 | 3.049919  | -0.472962 |
| H | -1.251568 | 2.395772  | -0.525624 |
| C | 1.589349  | 3.657362  | 0.265713  |
| H | 1.589038  | 4.314876  | -0.616740 |
| O | 1.158796  | 4.359513  | 1.407194  |
| H | 0.235049  | 4.595077  | 1.277243  |

|   |           |           |           |
|---|-----------|-----------|-----------|
| C | 3.011852  | 3.208421  | 0.525669  |
| H | 3.653245  | 4.096518  | 0.606074  |
| O | 3.104042  | 2.427960  | 1.705476  |
| H | 2.696837  | 2.932827  | 2.418220  |
| C | 4.880867  | 1.790073  | -0.456051 |
| H | 5.566155  | 2.584576  | -0.136776 |
| H | 5.244362  | 1.399430  | -1.410018 |
| O | 4.877792  | 0.705762  | 0.448441  |
| H | 4.510350  | 1.034551  | 1.280674  |
| C | -2.416981 | 0.132324  | -0.782239 |
| H | -1.745855 | 0.038847  | -1.639217 |
| C | -3.762607 | 1.809264  | 0.285686  |
| H | -3.294700 | 1.614126  | 1.259520  |
| O | -2.814136 | 1.464738  | -0.743916 |
| C | -3.636226 | -0.762411 | -0.947161 |
| H | -4.101805 | -0.474619 | -1.898166 |
| O | -3.256856 | -2.129893 | -0.991712 |
| H | -4.089287 | -2.619773 | -0.962628 |
| C | -4.631997 | -0.528374 | 0.176992  |
| H | -4.164563 | -0.796939 | 1.129232  |
| O | -5.741007 | -1.379002 | 0.010059  |
| H | -6.337705 | -0.938811 | -0.608727 |
| C | -5.018525 | 0.941900  | 0.206386  |
| H | -5.621203 | 1.135634  | 1.104159  |
| O | -5.786255 | 1.150442  | -0.963546 |
| H | -6.287478 | 1.965006  | -0.891137 |
| C | -4.041954 | 3.284369  | 0.128452  |
| H | -3.121739 | 3.861244  | 0.236542  |
| H | -4.747540 | 3.620617  | 0.893071  |
| H | -4.455023 | 3.492962  | -0.861493 |
| H | 2.613118  | -3.902635 | -0.496648 |

**Table S29:** XYZ-coordinates of [ $\beta$ -Le<sup>2</sup>+H]<sup>+</sup> ion (<sup>2</sup>B<sup>+</sup>).

|   |           |           |           |
|---|-----------|-----------|-----------|
| C | 1.771711  | 2.633160  | -1.033260 |
| H | 2.464078  | 2.236970  | -1.780202 |
| O | 2.271543  | 3.918915  | -0.702820 |
| H | 1.590623  | 4.345132  | -0.137132 |
| C | -0.645208 | 2.653325  | -0.846032 |
| H | -1.443165 | 2.417320  | -1.555789 |
| O | 0.537491  | 2.657466  | -1.650385 |
| C | 1.797378  | 1.739781  | 0.228280  |
| H | 1.617039  | 2.366020  | 1.111370  |
| N | 3.096423  | 1.096372  | 0.385825  |
| H | 3.105349  | 0.067607  | 0.464359  |
| C | 4.224433  | 1.734681  | 0.578886  |
| O | 4.323078  | 3.016944  | 0.508243  |
| C | 5.456138  | 0.989267  | 0.921293  |
| H | 5.479124  | 0.833752  | 2.005223  |
| H | 6.326370  | 1.580767  | 0.641305  |
| H | 5.466746  | 0.017914  | 0.420550  |
| C | 0.664399  | 0.726276  | 0.132193  |
| H | 0.723592  | 0.215066  | -0.832841 |
| O | 0.679885  | -0.186610 | 1.207558  |
| C | -0.638827 | 1.509186  | 0.199790  |
| H | -0.725027 | 1.907594  | 1.219217  |
| O | -1.695357 | 0.599325  | -0.035069 |
| C | -0.942724 | 4.027262  | -0.283241 |
| H | -1.932154 | 4.016715  | 0.184788  |
| H | -0.949007 | 4.751718  | -1.104096 |
| O | 0.052667  | 4.377728  | 0.682611  |
| H | -0.215920 | 5.170908  | 1.153494  |
| C | 1.033613  | -1.510379 | 0.962273  |

|   |           |           |           |
|---|-----------|-----------|-----------|
| H | 0.744603  | -2.046440 | 1.875335  |
| C | 2.980374  | -2.871461 | 0.671406  |
| H | 2.780707  | -3.428607 | 1.599271  |
| O | 2.438900  | -1.557486 | 0.797698  |
| C | 0.365268  | -2.145242 | -0.253698 |
| H | 0.708077  | -1.640243 | -1.166576 |
| O | -1.031713 | -2.130403 | -0.157203 |
| H | -1.321818 | -1.201316 | -0.165414 |
| C | 0.820317  | -3.588237 | -0.370774 |
| H | 0.495873  | -4.141420 | 0.523979  |
| O | 0.312888  | -4.185565 | -1.537591 |
| H | -0.630266 | -3.998558 | -1.584689 |
| C | 2.338460  | -3.642617 | -0.472857 |
| H | 2.660321  | -4.690280 | -0.396093 |
| O | 2.770926  | -3.090962 | -1.701897 |
| H | 2.244996  | -3.498616 | -2.400260 |
| C | 4.485050  | -2.710500 | 0.520239  |
| H | 4.928999  | -3.698192 | 0.340265  |
| H | 4.899867  | -2.327246 | 1.456317  |
| O | 4.832133  | -1.788697 | -0.484917 |
| H | 4.409102  | -2.086258 | -1.301892 |
| C | -2.987540 | 1.058672  | 0.372600  |
| H | -2.930988 | 2.133100  | 0.566559  |
| C | -3.697041 | -0.908437 | 1.536925  |
| H | -2.773776 | -1.468827 | 1.344998  |
| O | -3.390902 | 0.492689  | 1.565459  |
| C | -3.978844 | 0.794465  | -0.746927 |
| H | -4.925410 | 1.256642  | -0.435215 |
| O | -3.495789 | 1.392008  | -1.924427 |
| H | -4.034185 | 1.057111  | -2.650085 |
| C | -4.214984 | -0.698757 | -0.910354 |
| H | -3.284375 | -1.186575 | -1.215307 |
| O | -5.139303 | -0.928927 | -1.946324 |
| H | -6.016998 | -0.798850 | -1.565687 |
| C | -4.681022 | -1.270911 | 0.421842  |
| H | -4.715817 | -2.366291 | 0.345961  |
| O | -5.983140 | -0.746424 | 0.615594  |
| H | -6.445433 | -1.253135 | 1.285708  |
| C | -4.210334 | -1.254500 | 2.914499  |
| H | -5.102565 | -0.669140 | 3.150311  |
| H | -3.452450 | -1.028860 | 3.666505  |
| H | -4.448823 | -2.320053 | 2.978174  |
| H | 3.517606  | 3.489751  | 0.106064  |

**Table S30:** XYZ-coordinates of [ $\alpha$ -a16+H]<sup>+</sup> ion (C).

|   |           |           |           |
|---|-----------|-----------|-----------|
| C | -3.569188 | -2.339486 | 1.057256  |
| H | -3.289177 | -3.354217 | 1.357873  |
| O | -3.954976 | -1.571382 | 2.168810  |
| H | -4.624821 | -2.045697 | 2.669678  |
| C | -5.099456 | -1.287671 | -0.406576 |
| H | -5.505219 | -0.658616 | 0.395018  |
| O | -4.585832 | -2.502572 | 0.127331  |
| C | -2.363132 | -1.616023 | 0.446239  |
| H | -1.875390 | -2.270981 | -0.276536 |
| N | -1.433228 | -1.326788 | 1.522589  |
| H | -1.854116 | -0.898984 | 2.338657  |
| C | -0.135811 | -1.481408 | 1.525273  |
| O | 0.421471  | -2.048256 | 0.523824  |
| C | 0.618028  | -1.044475 | 2.730868  |
| H | 0.252755  | -1.587071 | 3.606882  |
| H | 0.448655  | 0.023513  | 2.888035  |

|   |           |           |           |
|---|-----------|-----------|-----------|
| H | 1.680820  | -1.240623 | 2.613883  |
| C | -2.774850 | -0.315566 | -0.249364 |
| H | -3.025667 | 0.430474  | 0.511440  |
| O | -1.725342 | 0.120217  | -1.089010 |
| H | -5.309776 | 0.693795  | -1.908316 |
| C | -4.001505 | -0.508649 | -1.128381 |
| H | -3.689850 | -1.065680 | -2.024579 |
| O | -4.448513 | 0.783639  | -1.471944 |
| C | -6.217937 | -1.714613 | -1.340263 |
| H | -6.993020 | -2.227692 | -0.760975 |
| H | -5.812029 | -2.413864 | -2.082051 |
| O | -6.723129 | -0.542634 | -1.958406 |
| H | -7.420571 | -0.770369 | -2.576168 |
| C | -0.977736 | 1.256137  | -0.806702 |
| H | -0.513906 | 1.512994  | -1.769474 |
| C | 1.015565  | 1.946424  | 0.181434  |
| H | 1.350356  | 2.171517  | -0.844299 |
| O | 0.038492  | 0.923043  | 0.123059  |
| C | -1.753414 | 2.463462  | -0.285214 |
| H | -2.187744 | 2.218546  | 0.695452  |
| O | -2.717731 | 2.930439  | -1.184225 |
| H | -3.390700 | 2.243896  | -1.333948 |
| C | -0.784422 | 3.619766  | -0.067946 |
| H | -0.427442 | 3.945774  | -1.056881 |
| O | -1.418221 | 4.681688  | 0.603148  |
| H | -2.245947 | 4.863436  | 0.145792  |
| C | 0.416038  | 3.212930  | 0.773407  |
| H | 1.160058  | 4.022099  | 0.733191  |
| O | 0.043148  | 2.950250  | 2.108046  |
| H | -0.527346 | 3.678587  | 2.379920  |
| C | 2.206059  | 1.454509  | 0.966201  |
| H | 1.958350  | 1.342923  | 2.027065  |
| H | 3.012038  | 2.191810  | 0.881719  |
| O | 2.610211  | 0.209368  | 0.419312  |
| C | 3.852912  | -0.230699 | 0.869626  |
| H | 3.914681  | -0.168166 | 1.964491  |
| C | 5.030032  | 0.612076  | -1.029510 |
| H | 4.068961  | 0.946000  | -1.440363 |
| O | 4.920012  | 0.550260  | 0.404310  |
| C | 4.034963  | -1.658695 | 0.384822  |
| H | 4.944942  | -2.047830 | 0.855641  |
| O | 2.940023  | -2.480079 | 0.796830  |
| H | 3.096415  | -3.342521 | 0.385469  |
| C | 4.188392  | -1.724544 | -1.125772 |
| H | 3.244655  | -1.421315 | -1.590760 |
| O | 4.423027  | -3.064237 | -1.494913 |
| H | 5.377972  | -3.203996 | -1.445680 |
| C | 5.302101  | -0.784954 | -1.575009 |
| H | 5.321379  | -0.751962 | -2.668819 |
| O | 6.552159  | -1.311185 | -1.170014 |
| H | 6.770651  | -0.959656 | -0.300947 |
| C | 6.106963  | 1.619246  | -1.350026 |
| H | 5.852676  | 2.590700  | -0.922623 |
| H | 6.206674  | 1.728574  | -2.432440 |
| H | 7.074319  | 1.309033  | -0.949606 |
| H | 1.428941  | -2.091960 | 0.604672  |

**Table S31:** XYZ-coordinates of [ $\alpha$ -a16+H]<sup>+</sup> ion (<sup>2</sup>C).

|   |           |          |          |
|---|-----------|----------|----------|
| C | 0.258211  | 3.116220 | 1.102832 |
| H | -0.310753 | 3.017939 | 2.032501 |
| O | 1.142197  | 4.205677 | 1.162068 |
| H | 0.658257  | 4.996033 | 1.419187 |

|   |           |           |           |
|---|-----------|-----------|-----------|
| C | -0.176369 | 3.239762  | -1.238881 |
| H | 0.495448  | 4.099684  | -1.356662 |
| O | -0.695833 | 3.228035  | 0.097347  |
| C | 1.128868  | 1.875346  | 0.892404  |
| H | 0.475628  | 1.008464  | 1.012746  |
| N | 2.149696  | 1.864914  | 1.927157  |
| H | 2.486551  | 2.781973  | 2.200330  |
| C | 2.663264  | 0.822104  | 2.527976  |
| O | 2.371363  | -0.391461 | 2.243738  |
| C | 3.635487  | 1.008232  | 3.632866  |
| H | 4.588534  | 0.559358  | 3.341657  |
| H | 3.275714  | 0.464126  | 4.509434  |
| H | 3.784242  | 2.056870  | 3.886897  |
| C | 1.751029  | 1.884934  | -0.508282 |
| H | 2.374922  | 2.775050  | -0.628735 |
| O | 2.669454  | 0.804780  | -0.648005 |
| H | 0.444600  | 1.797910  | -3.431059 |
| C | 0.610669  | 1.949628  | -1.508171 |
| H | -0.072124 | 1.103341  | -1.354606 |
| O | 1.158285  | 1.938785  | -2.801920 |
| C | -1.349170 | 3.405403  | -2.190124 |
| H | -0.957345 | 3.720289  | -3.162613 |
| H | -1.980341 | 4.220190  | -1.818224 |
| O | -2.072199 | 2.216859  | -2.382262 |
| H | -2.813630 | 2.167721  | -1.760061 |
| C | 2.196795  | -0.426897 | -1.058013 |
| H | 1.626308  | -0.353417 | -1.992756 |
| C | 0.797454  | -2.220539 | -0.344891 |
| H | 0.328710  | -2.147840 | -1.335908 |
| O | 1.338139  | -0.928066 | -0.031352 |
| C | 3.394921  | -1.351468 | -1.200681 |
| H | 3.951827  | -1.314642 | -0.253703 |
| O | 4.206504  | -1.000345 | -2.291219 |
| H | 4.563097  | -0.119290 | -2.148894 |
| C | 2.942038  | -2.785512 | -1.441335 |
| H | 2.480879  | -2.835541 | -2.439715 |
| O | 4.025966  | -3.675023 | -1.348626 |
| H | 4.723573  | -3.367829 | -1.935994 |
| C | 1.917715  | -3.237718 | -0.404788 |
| H | 1.503755  | -4.203664 | -0.728576 |
| O | 2.487503  | -3.335784 | 0.876055  |
| H | 3.301261  | -3.844446 | 0.786237  |
| C | -0.290250 | -2.502631 | 0.661239  |
| H | 0.105835  | -2.477868 | 1.684110  |
| H | -0.710039 | -3.499661 | 0.479326  |
| O | -1.240722 | -1.485124 | 0.454706  |
| C | -2.279254 | -1.369647 | 1.377524  |
| H | -1.915898 | -1.536466 | 2.398308  |
| C | -3.863855 | -2.295114 | -0.140697 |
| H | -3.061364 | -2.465047 | -0.869998 |
| O | -3.294852 | -2.317442 | 1.177226  |
| C | -2.844416 | 0.034146  | 1.205828  |
| H | -3.662268 | 0.149321  | 1.930985  |
| O | -1.846769 | 0.992279  | 1.455192  |
| H | -2.073532 | 1.782556  | 0.947617  |
| C | -3.397462 | 0.150171  | -0.206295 |
| H | -2.575101 | 0.018534  | -0.914637 |
| O | -3.903595 | 1.456920  | -0.427042 |
| H | -4.819817 | 1.471426  | -0.120746 |
| C | -4.455232 | -0.920071 | -0.443331 |
| H | -4.763416 | -0.891495 | -1.493423 |
| O | -5.614337 | -0.612903 | 0.310252  |
| H | -5.526637 | -0.998761 | 1.187446  |

|   |           |           |           |
|---|-----------|-----------|-----------|
| C | -4.867311 | -3.420180 | -0.213176 |
| H | -4.377978 | -4.371386 | 0.002977  |
| H | -5.305353 | -3.470016 | -1.212825 |
| H | -5.676777 | -3.278534 | 0.505820  |
| H | 1.897724  | -0.583792 | 1.362198  |

**Table S32:** XYZ-coordinates of [ $\beta$ -a16+H]<sup>+</sup> ion (C).

|   |           |           |           |
|---|-----------|-----------|-----------|
| C | 0.807114  | -2.500324 | -0.061823 |
| H | 0.443580  | -1.919429 | -0.917120 |
| O | -0.139500 | -3.467625 | 0.284354  |
| H | -0.854893 | -3.427886 | -0.382643 |
| C | 2.979025  | -2.243746 | -0.872034 |
| H | 2.604731  | -1.760305 | -1.787848 |
| O | 2.010122  | -3.143747 | -0.364718 |
| C | 1.074134  | -1.573043 | 1.127998  |
| H | 1.550784  | -2.164887 | 1.919320  |
| N | -0.116844 | -0.945909 | 1.685653  |
| H | -0.193032 | 0.073773  | 1.556672  |
| C | -0.985849 | -1.542949 | 2.449949  |
| O | -1.022718 | -2.827734 | 2.579208  |
| C | -1.974784 | -0.763840 | 3.228720  |
| H | -2.969942 | -1.189020 | 3.087220  |
| H | -1.964694 | 0.286885  | 2.946934  |
| H | -1.726146 | -0.861360 | 4.290294  |
| C | 2.019838  | -0.488533 | 0.627298  |
| H | 1.527173  | -0.010665 | -0.223659 |
| O | 2.281323  | 0.463509  | 1.643495  |
| H | 4.803583  | -0.563993 | -0.939995 |
| C | 3.307391  | -1.131043 | 0.140172  |
| H | 3.834823  | -1.563769 | 1.003644  |
| O | 4.083019  | -0.119971 | -0.464253 |
| C | 4.187586  | -3.098868 | -1.206125 |
| H | 3.908708  | -3.826775 | -1.974757 |
| H | 4.498319  | -3.639709 | -0.303820 |
| O | 5.209088  | -2.226189 | -1.663188 |
| H | 6.004491  | -2.724153 | -1.861512 |
| C | 1.847894  | 1.763422  | 1.393728  |
| H | 2.155008  | 2.342311  | 2.272357  |
| C | -0.250461 | 2.914845  | 0.967545  |
| H | -0.077296 | 3.661193  | 1.759218  |
| O | 0.423533  | 1.711769  | 1.306780  |
| C | 2.445228  | 2.374489  | 0.128477  |
| H | 2.236311  | 1.715086  | -0.722102 |
| O | 3.823041  | 2.569561  | 0.260904  |
| H | 4.235182  | 1.702688  | 0.118751  |
| C | 1.801603  | 3.713131  | -0.178020 |
| H | 2.023489  | 4.424206  | 0.631505  |
| O | 2.254117  | 4.207652  | -1.414943 |
| H | 3.214590  | 4.127637  | -1.427576 |
| C | 0.295435  | 3.542943  | -0.302748 |
| H | -0.168089 | 4.532260  | -0.414243 |
| O | -0.002236 | 2.754227  | -1.445556 |
| H | 0.551788  | 3.104444  | -2.157644 |
| C | -1.752735 | 2.603038  | 0.983565  |
| H | -2.301167 | 3.389102  | 0.453190  |
| H | -2.094180 | 2.610711  | 2.022740  |
| O | -2.053520 | 1.323198  | 0.470253  |
| C | -2.569390 | 1.240411  | -0.839034 |
| H | -2.302228 | 2.136567  | -1.403437 |
| C | -4.521991 | 0.057776  | -0.174174 |
| H | -4.162577 | 0.069270  | 0.863652  |



|   |           |           |           |
|---|-----------|-----------|-----------|
| O | -3.964767 | 1.185395  | -0.858433 |
| C | -1.954429 | 0.000042  | -1.497478 |
| H | -2.273955 | 0.002535  | -2.549820 |
| O | -0.551091 | 0.017373  | -1.417874 |
| H | -0.261656 | 0.943903  | -1.483347 |
| C | -2.498829 | -1.249425 | -0.820615 |
| H | -2.145154 | -1.252920 | 0.210510  |
| O | -2.007921 | -2.443522 | -1.408582 |
| H | -2.547267 | -2.630200 | -2.187809 |
| C | -4.023313 | -1.230417 | -0.819929 |
| H | -4.384503 | -2.085255 | -0.238154 |
| O | -4.496093 | -1.428470 | -2.137989 |
| H | -4.575378 | -0.572559 | -2.571613 |
| C | -6.023058 | 0.212645  | -0.196010 |
| H | -6.406221 | 0.212909  | -1.218453 |
| H | -6.308226 | 1.152475  | 0.279424  |
| H | -6.495674 | -0.611525 | 0.343625  |
| H | -0.596015 | -3.268910 | 1.774487  |

**Table S33:** XYZ-coordinates of [ $\alpha$ -an16+H]<sup>+</sup> ion (D).

|   |           |           |           |
|---|-----------|-----------|-----------|
| C | -0.159276 | 3.576135  | -0.639307 |
| H | -0.136687 | 3.846504  | -1.700268 |
| O | -0.677945 | 4.618463  | 0.139707  |
| H | -0.213107 | 5.433708  | -0.069011 |
| C | 1.368152  | 2.765347  | 1.006666  |
| H | 1.205531  | 3.581506  | 1.721566  |
| O | 1.153529  | 3.235108  | -0.325486 |
| C | -1.069924 | 2.374076  | -0.413137 |
| H | -0.721753 | 1.561152  | -1.047024 |
| N | -2.449424 | 2.632908  | -0.785296 |
| H | -2.971822 | 3.274402  | -0.203510 |
| C | -3.104334 | 1.907661  | -1.658686 |
| O | -2.433375 | 1.176039  | -2.461162 |
| C | -4.587545 | 1.946897  | -1.710723 |
| H | -4.920178 | 2.096089  | -2.739590 |
| H | -5.007187 | 2.719596  | -1.066897 |
| H | -4.961588 | 0.974284  | -1.372089 |
| C | -1.003353 | 1.947317  | 1.058221  |
| H | -1.318815 | 2.776680  | 1.697799  |
| O | -1.932584 | 0.913810  | 1.355133  |
| H | 1.155364  | 0.484813  | 2.745360  |
| C | 0.438208  | 1.599151  | 1.361091  |
| H | 0.734362  | 0.760771  | 0.722157  |
| O | 0.576198  | 1.260746  | 2.712063  |
| C | 2.813378  | 2.316606  | 1.092573  |
| H | 3.074975  | 2.173816  | 2.146183  |
| H | 3.463169  | 3.086562  | 0.663775  |
| O | 2.941207  | 1.102782  | 0.376031  |
| C | -1.628823 | -0.398575 | 1.025533  |
| H | -0.617352 | -0.677125 | 1.354383  |
| C | -1.572100 | -1.866474 | -0.855391 |
| H | -0.568208 | -2.249725 | -0.613148 |
| O | -1.732128 | -0.539190 | -0.378103 |
| C | -2.664692 | -1.256785 | 1.731785  |
| H | -3.655232 | -0.869875 | 1.455158  |
| O | -2.480155 | -1.253645 | 3.124618  |
| H | -2.515795 | -0.344751 | 3.438012  |
| C | -2.555069 | -2.701800 | 1.283547  |
| H | -1.595869 | -3.105811 | 1.640873  |
| O | -3.631219 | -3.472374 | 1.762926  |
| H | -3.713964 | -3.322595 | 2.710137  |

|   |           |           |           |
|---|-----------|-----------|-----------|
| C | -2.590571 | -2.808921 | -0.230452 |
| H | -2.340055 | -3.838026 | -0.519209 |
| O | -3.884560 | -2.477059 | -0.720452 |
| H | -4.529097 | -2.957085 | -0.185997 |
| C | -1.691555 | -1.799116 | -2.367476 |
| H | -1.623360 | -2.803218 | -2.794753 |
| H | -0.887728 | -1.189625 | -2.782718 |
| O | -2.919507 | -1.188142 | -2.790214 |
| H | -3.627934 | -1.607047 | -2.262814 |
| C | 3.821606  | 0.124508  | 0.844189  |
| H | 4.304074  | 0.441226  | 1.774326  |
| C | 4.381111  | -0.462449 | -1.383664 |
| H | 3.709032  | 0.331464  | -1.730468 |
| O | 4.852169  | -0.114172 | -0.073491 |
| C | 3.051148  | -1.176968 | 1.045454  |
| H | 3.769474  | -1.929125 | 1.395677  |
| O | 2.044391  | -1.004917 | 2.028217  |
| H | 1.604091  | -1.854932 | 2.130865  |
| C | 2.457947  | -1.620421 | -0.282595 |
| H | 1.740376  | -0.862091 | -0.612381 |
| O | 1.736301  | -2.827828 | -0.120745 |
| H | 2.382995  | -3.541764 | -0.205510 |
| C | 3.571007  | -1.755389 | -1.319244 |
| H | 3.126342  | -1.946753 | -2.301694 |
| O | 4.346051  | -2.900845 | -1.010184 |
| H | 5.077331  | -2.635685 | -0.443183 |
| C | 5.588178  | -0.542575 | -2.286392 |
| H | 5.280814  | -0.783653 | -3.306829 |
| H | 6.288945  | -1.310723 | -1.952032 |
| H | 6.108295  | 0.416466  | -2.294223 |
| H | -2.801401 | 0.200634  | -2.658657 |

**Table S34:** XYZ-coordinates of [ $\alpha$ -an16+H]<sup>+</sup> ion (<sup>2</sup>D).

|   |           |           |           |
|---|-----------|-----------|-----------|
| C | -0.563560 | -2.669783 | -0.970535 |
| H | -0.438314 | -3.735053 | -0.750866 |
| O | -1.513128 | -2.469430 | -1.982075 |
| H | -1.303596 | -3.034037 | -2.731903 |
| C | 0.781081  | -0.803413 | -1.540047 |
| H | 0.076975  | -0.543656 | -2.340689 |
| O | 0.705891  | -2.211069 | -1.293395 |
| C | -1.109910 | -1.937427 | 0.261091  |
| H | -0.487571 | -2.228245 | 1.114074  |
| N | -2.467382 | -2.391603 | 0.521225  |
| H | -3.064849 | -2.564037 | -0.286881 |
| C | -3.034715 | -2.361037 | 1.694737  |
| O | -2.447714 | -1.819405 | 2.715271  |
| C | -4.335018 | -3.016560 | 1.934170  |
| H | -4.827093 | -3.278215 | 0.998213  |
| H | -4.965629 | -2.363708 | 2.538127  |
| H | -4.154352 | -3.928459 | 2.513653  |
| C | -1.031851 | -0.426093 | 0.078181  |
| H | -1.708269 | -0.145170 | -0.732089 |
| O | -1.449938 | 0.197637  | 1.297395  |
| H | 1.425263  | 1.586771  | -0.127244 |
| C | 0.399157  | -0.050807 | -0.260359 |
| H | 1.056729  | -0.398832 | 0.545172  |
| O | 0.522983  | 1.338280  | -0.420509 |
| C | 2.178322  | -0.464337 | -2.011092 |
| H | 2.131458  | 0.459794  | -2.598076 |
| H | 2.550027  | -1.269237 | -2.654728 |
| O | 3.009920  | -0.274422 | -0.887220 |

|   |           |           |           |
|---|-----------|-----------|-----------|
| C | -2.575658 | 1.057386  | 1.173733  |
| H | -2.694519 | 1.499333  | 2.170757  |
| C | -4.864134 | 0.748483  | 0.371818  |
| H | -5.419465 | 1.205430  | 1.204798  |
| O | -3.641451 | 0.204468  | 0.849918  |
| C | -2.354484 | 2.163032  | 0.146748  |
| H | -2.002295 | 1.725281  | -0.791892 |
| O | -1.431024 | 3.105663  | 0.611360  |
| H | -0.560054 | 2.734907  | 0.404207  |
| C | -3.661881 | 2.858552  | -0.177383 |
| H | -4.063705 | 3.345805  | 0.724326  |
| O | -3.478099 | 3.792272  | -1.211409 |
| H | -2.710699 | 4.329705  | -0.986661 |
| C | -4.658981 | 1.826729  | -0.676366 |
| H | -5.625614 | 2.318281  | -0.849394 |
| O | -4.200890 | 1.222726  | -1.874765 |
| H | -3.987394 | 1.934143  | -2.489498 |
| C | -5.666685 | -0.442996 | -0.146625 |
| H | -6.561157 | -0.067387 | -0.659433 |
| H | -6.005936 | -1.045224 | 0.698477  |
| O | -4.914086 | -1.299812 | -0.977597 |
| H | -4.597605 | -0.759720 | -1.713935 |
| C | 4.078080  | 0.615584  | -1.041434 |
| H | 3.891484  | 1.289012  | -1.885477 |
| C | 5.689722  | -0.978455 | -0.328713 |
| H | 4.873001  | -1.695676 | -0.180948 |
| O | 5.283493  | -0.030789 | -1.331099 |
| C | 4.214078  | 1.402646  | 0.252770  |
| H | 4.984867  | 2.167036  | 0.089852  |
| O | 2.984571  | 2.043152  | 0.551509  |
| H | 3.059917  | 2.379450  | 1.453003  |
| C | 4.649357  | 0.495267  | 1.391376  |
| H | 3.849287  | -0.224807 | 1.592325  |
| O | 4.817094  | 1.259467  | 2.563431  |
| H | 5.713767  | 1.617708  | 2.534089  |
| C | 5.917916  | -0.254490 | 0.994373  |
| H | 6.156892  | -0.987028 | 1.771812  |
| O | 7.006958  | 0.650299  | 0.956321  |
| H | 7.065878  | 1.022600  | 0.070614  |
| C | 6.911008  | -1.690099 | -0.857179 |
| H | 7.737020  | -0.994688 | -1.020377 |
| H | 6.678033  | -2.178959 | -1.804584 |
| H | 7.241366  | -2.448213 | -0.143134 |
| H | -1.849900 | -1.089079 | 2.403051  |

**Table S35:** XYZ-coordinates of [ $\beta$ -an16+H]<sup>+</sup> ion (*D*).

|   |           |          |           |
|---|-----------|----------|-----------|
| C | -1.027909 | 2.781461 | 0.641427  |
| H | -1.193876 | 2.354830 | 1.644697  |
| O | -1.488983 | 4.099216 | 0.584514  |
| H | -0.931338 | 4.678858 | 1.114312  |
| C | 0.960108  | 1.537510 | 0.409169  |
| H | 0.869808  | 1.130507 | 1.428043  |
| O | 0.324634  | 2.807506 | 0.334846  |
| C | -1.777248 | 1.979622 | -0.422213 |
| H | -1.583584 | 2.457670 | -1.390336 |
| N | -3.221990 | 1.916385 | -0.199936 |
| H | -3.621001 | 0.970477 | -0.085204 |
| C | -4.081266 | 2.877157 | -0.425387 |
| O | -3.727350 | 4.097888 | -0.653813 |
| C | -5.532340 | 2.592690 | -0.452599 |
| H | -5.789485 | 2.169947 | -1.429421 |

|   |           |           |           |
|---|-----------|-----------|-----------|
| H | -6.089449 | 3.516881  | -0.311778 |
| H | -5.779808 | 1.861305  | 0.320648  |
| C | -1.215231 | 0.557262  | -0.435268 |
| H | -1.477902 | 0.080902  | 0.517707  |
| O | -1.763131 | -0.157593 | -1.524466 |
| H | 1.658128  | -0.902721 | -0.332193 |
| C | 0.308671  | 0.541725  | -0.559653 |
| H | 0.566865  | 0.815417  | -1.593020 |
| O | 0.692874  | -0.776052 | -0.264849 |
| C | 2.413861  | 1.840667  | 0.058756  |
| H | 2.894231  | 2.406195  | 0.863331  |
| H | 2.416075  | 2.463272  | -0.840536 |
| O | 3.130909  | 0.665149  | -0.240235 |
| C | -2.583040 | -1.253758 | -1.251444 |
| H | -2.814394 | -1.676265 | -2.236591 |
| C | -4.750174 | -1.711096 | -0.302031 |
| H | -5.116196 | -2.195081 | -1.219823 |
| O | -3.759985 | -0.745205 | -0.643275 |
| C | -1.940609 | -2.319430 | -0.366617 |
| H | -1.632761 | -1.864505 | 0.583226  |
| O | -0.853325 | -2.927540 | -1.001314 |
| H | -0.115309 | -2.301099 | -0.922962 |
| C | -2.948639 | -3.403747 | -0.032615 |
| H | -3.235555 | -3.922820 | -0.960083 |
| O | -2.411752 | -4.310043 | 0.898875  |
| H | -1.537524 | -4.564974 | 0.584489  |
| C | -4.189169 | -2.797685 | 0.598042  |
| H | -4.953017 | -3.580093 | 0.705103  |
| O | -3.889683 | -2.235281 | 1.863451  |
| H | -3.400382 | -2.901333 | 2.360657  |
| C | -5.897719 | -0.940612 | 0.332784  |
| H | -6.628273 | -1.654270 | 0.733636  |
| H | -6.403317 | -0.346897 | -0.433049 |
| O | -5.452317 | -0.037046 | 1.318873  |
| H | -4.964542 | -0.555222 | 1.973698  |
| C | 3.914701  | 0.150279  | 0.809509  |
| H | 3.342796  | 0.139994  | 1.745148  |
| C | 5.946683  | 1.065911  | -0.039518 |
| H | 5.389942  | 1.464247  | -0.896858 |
| O | 5.038886  | 0.934232  | 1.071897  |
| C | 4.317920  | -1.256669 | 0.400738  |
| H | 4.810942  | -1.716656 | 1.268232  |
| O | 3.155844  | -1.986945 | 0.071729  |
| H | 3.446043  | -2.791046 | -0.375195 |
| C | 5.299082  | -1.224925 | -0.762493 |
| H | 4.779556  | -0.843535 | -1.647491 |
| O | 5.707323  | -2.538620 | -1.062742 |
| H | 6.440142  | -2.746242 | -0.469104 |
| C | 6.472668  | -0.309868 | -0.430064 |
| H | 7.111661  | -0.215559 | -1.313537 |
| O | 7.274296  | -0.905736 | 0.573981  |
| H | 6.929355  | -0.650461 | 1.435418  |
| C | 7.019548  | 2.041181  | 0.377660  |
| H | 7.715290  | 2.205997  | -0.448393 |
| H | 7.588266  | 1.664657  | 1.230326  |
| H | 6.572453  | 2.997937  | 0.653383  |
| H | -2.795236 | 4.277500  | -0.365805 |

**Table S36:** XYZ-coordinates of [ $\beta$ -an16+H]<sup>+</sup> ion (<sup>2</sup>D').

|   |           |          |          |
|---|-----------|----------|----------|
| C | 0.311274  | 0.485989 | 1.888925 |
| H | -0.349412 | 1.005406 | 2.587695 |

|   |           |           |           |
|---|-----------|-----------|-----------|
| O | 1.525361  | 1.221237  | 1.909627  |
| H | 2.162192  | 0.705631  | 1.368605  |
| C | 0.767947  | -1.870123 | 1.505016  |
| H | 0.508024  | -2.765758 | 2.073938  |
| O | 0.431263  | -0.796772 | 2.385534  |
| C | -0.278895 | 0.548582  | 0.461072  |
| H | 0.545131  | 0.613417  | -0.260244 |
| N | -1.105197 | 1.742939  | 0.309457  |
| H | -2.082209 | 1.601584  | 0.026073  |
| C | -0.663966 | 2.971218  | 0.396646  |
| O | 0.540912  | 3.258852  | 0.746475  |
| C | -1.555779 | 4.108057  | 0.067415  |
| H | -2.591975 | 3.860837  | 0.305146  |
| H | -1.469439 | 4.323576  | -1.002624 |
| H | -1.235153 | 4.990487  | 0.619444  |
| C | -1.066908 | -0.715456 | 0.180448  |
| H | -1.857509 | -0.838879 | 0.927082  |
| O | -1.593364 | -0.704025 | -1.141512 |
| H | -1.421128 | -3.139779 | -0.497881 |
| C | -0.108963 | -1.898122 | 0.242599  |
| H | 0.522742  | -1.811541 | -0.654796 |
| O | -0.797213 | -3.117578 | 0.243759  |
| C | 2.255515  | -1.931558 | 1.224830  |
| H | 2.477016  | -2.803562 | 0.601960  |
| H | 2.804955  | -2.031634 | 2.164797  |
| O | 2.693688  | -0.737753 | 0.575286  |
| C | -2.965213 | -0.635298 | -1.315274 |
| H | -3.115334 | -0.719368 | -2.399672 |
| C | -4.772548 | 0.915443  | -1.006451 |
| H | -5.038750 | 0.896578  | -2.074777 |
| O | -3.389215 | 0.631587  | -0.857103 |
| C | -3.742715 | -1.741144 | -0.608904 |
| H | -3.532176 | -1.712268 | 0.467176  |
| O | -3.320506 | -2.964051 | -1.165003 |
| H | -3.864409 | -3.660064 | -0.779933 |
| C | -5.235432 | -1.523394 | -0.780435 |
| H | -5.493028 | -1.633235 | -1.842455 |
| O | -5.869750 | -2.523434 | -0.001061 |
| H | -6.721082 | -2.750922 | -0.382989 |
| C | -5.625354 | -0.127913 | -0.300765 |
| H | -6.677360 | 0.064177  | -0.560542 |
| O | -5.433490 | -0.003057 | 1.093101  |
| H | -5.850209 | -0.759279 | 1.521482  |
| C | -4.978334 | 2.330563  | -0.482212 |
| H | -6.054528 | 2.542483  | -0.438958 |
| H | -4.530204 | 3.039178  | -1.183588 |
| O | -4.349170 | 2.541668  | 0.758463  |
| H | -4.698876 | 1.885682  | 1.374890  |
| C | 3.371958  | -0.902558 | -0.652160 |
| H | 2.753532  | -1.498558 | -1.332736 |
| C | 5.544249  | -0.995676 | 0.334150  |
| H | 5.087068  | -0.791957 | 1.311142  |
| O | 4.558092  | -1.618141 | -0.512067 |
| C | 3.640494  | 0.480954  | -1.223359 |
| H | 4.009950  | 0.322289  | -2.246269 |
| O | 2.444218  | 1.230325  | -1.256348 |
| H | 2.697804  | 2.119834  | -1.531248 |
| C | 4.717802  | 1.216511  | -0.435323 |
| H | 4.327522  | 1.469953  | 0.556973  |
| O | 5.001678  | 2.435896  | -1.079090 |
| H | 5.676315  | 2.248656  | -1.744656 |
| C | 5.953986  | 0.338836  | -0.274280 |
| H | 6.663279  | 0.840325  | 0.391415  |

|   |          |           |           |
|---|----------|-----------|-----------|
| O | 6.608270 | 0.205443  | -1.522007 |
| H | 6.236769 | -0.551193 | -1.986851 |
| C | 6.677319 | -1.978976 | 0.491901  |
| H | 7.150532 | -2.195174 | -0.468027 |
| H | 6.307780 | -2.914323 | 0.915642  |
| H | 7.436927 | -1.568151 | 1.160937  |
| H | 1.066825 | 2.477786  | 1.140182  |

**Table S37:** XYZ-coordinates of [ $\alpha$ -bn16+H]<sup>+</sup> ion (E).

|   |           |           |           |
|---|-----------|-----------|-----------|
| C | -1.624388 | 3.394047  | -0.604686 |
| H | -1.863689 | 3.649747  | -1.642581 |
| O | -2.347869 | 4.200459  | 0.290119  |
| H | -2.211452 | 5.126175  | 0.067733  |
| C | 0.337294  | 3.140930  | 0.734257  |
| H | 0.018154  | 3.822327  | 1.533300  |
| O | -0.249444 | 3.532441  | -0.508401 |
| C | -2.047733 | 1.956627  | -0.301050 |
| H | -1.603446 | 1.316824  | -1.063431 |
| N | -3.494648 | 1.858257  | -0.387075 |
| H | -3.998500 | 2.679183  | -0.070337 |
| C | -4.197402 | 0.815041  | -0.755174 |
| O | -3.700526 | -0.303620 | -1.121687 |
| C | -5.678485 | 0.897410  | -0.785660 |
| H | -6.046574 | 1.891621  | -0.536004 |
| H | -6.084447 | 0.167019  | -0.081191 |
| H | -6.024011 | 0.615518  | -1.782978 |
| C | -1.548708 | 1.532739  | 1.084450  |
| H | -2.008134 | 2.163229  | 1.850217  |
| O | -1.994679 | 0.213116  | 1.387378  |
| H | 1.324570  | 1.050821  | 2.254224  |
| C | -0.047356 | 1.709717  | 1.112365  |
| H | 0.399058  | 1.055018  | 0.354791  |
| O | 0.428690  | 1.392659  | 2.390643  |
| C | 1.839178  | 3.262254  | 0.559259  |
| H | 2.327044  | 3.134889  | 1.529986  |
| H | 2.076752  | 4.256863  | 0.172515  |
| O | 2.299401  | 2.294911  | -0.374988 |
| C | -1.204683 | -0.837957 | 0.950492  |
| H | -0.167960 | -0.737376 | 1.293241  |
| C | -0.437483 | -1.867969 | -1.069322 |
| H | 0.594538  | -1.777951 | -0.701984 |
| O | -1.227047 | -0.823943 | -0.474969 |
| C | -1.813568 | -2.131175 | 1.458504  |
| H | -2.860962 | -2.168055 | 1.127762  |
| O | -1.706268 | -2.248036 | 2.854918  |
| H | -2.189977 | -1.527783 | 3.268545  |
| C | -1.063272 | -3.314869 | 0.866369  |
| H | -0.041362 | -3.312268 | 1.274503  |
| O | -1.715288 | -4.526275 | 1.160152  |
| H | -1.868343 | -4.566952 | 2.109256  |
| C | -0.977583 | -3.223426 | -0.651097 |
| H | -0.278580 | -3.994419 | -1.003788 |
| O | -2.250656 | -3.409153 | -1.238761 |
| H | -2.642183 | -4.191115 | -0.832298 |
| C | -0.461564 | -1.618748 | -2.568458 |
| H | 0.036390  | -2.459100 | -3.071120 |
| H | 0.111207  | -0.714195 | -2.789671 |
| O | -1.760506 | -1.399144 | -3.057191 |
| H | -2.276404 | -2.191778 | -2.861727 |
| C | 3.243485  | 1.383169  | 0.061414  |
| H | 4.106585  | 1.891672  | 0.524779  |

|   |           |           |           |
|---|-----------|-----------|-----------|
| C | 3.528990  | -0.526439 | 1.467923  |
| H | 4.436698  | -0.058277 | 1.879092  |
| O | 2.651089  | 0.512397  | 1.014971  |
| C | 3.663185  | 0.593192  | -1.167305 |
| H | 2.745880  | 0.171472  | -1.600782 |
| O | 4.349291  | 1.392102  | -2.098517 |
| H | 3.753305  | 2.080637  | -2.406231 |
| C | 4.589959  | -0.544452 | -0.786946 |
| H | 5.532887  | -0.119166 | -0.412079 |
| O | 4.830775  | -1.391268 | -1.886766 |
| H | 5.116998  | -0.847708 | -2.627525 |
| C | 3.964927  | -1.402074 | 0.303262  |
| H | 4.725268  | -2.103597 | 0.674090  |
| O | 2.854969  | -2.114697 | -0.206799 |
| H | 3.163062  | -2.512850 | -1.030059 |
| C | 2.812107  | -1.291082 | 2.554844  |
| H | 2.548374  | -0.633707 | 3.386500  |
| H | 3.457890  | -2.081887 | 2.942749  |
| H | 1.905330  | -1.755760 | 2.163849  |
| H | -2.708301 | -0.464072 | -1.005276 |

**Table S38:** XYZ-coordinates of [ $\alpha$ -bn16+H]<sup>+</sup> ion (<sup>2</sup>E).

|   |           |           |           |
|---|-----------|-----------|-----------|
| C | -0.985574 | 3.703172  | -0.369026 |
| H | -1.227100 | 4.080616  | -1.368158 |
| O | -1.549354 | 4.509120  | 0.628428  |
| H | -1.316457 | 5.427365  | 0.464863  |
| C | 0.978866  | 3.087318  | 0.848646  |
| H | 0.824633  | 3.761976  | 1.700669  |
| O | 0.405709  | 3.649219  | -0.332078 |
| C | -1.561508 | 2.304633  | -0.171506 |
| H | -1.170270 | 1.663141  | -0.958429 |
| N | -3.008552 | 2.264644  | -0.280235 |
| H | -3.539945 | 2.705910  | 0.458528  |
| C | -3.640633 | 1.481365  | -1.120507 |
| O | -2.989412 | 1.004412  | -2.109001 |
| C | -5.078706 | 1.169329  | -0.924131 |
| H | -5.528246 | 1.758166  | -0.124859 |
| H | -5.159259 | 0.109097  | -0.659743 |
| H | -5.624142 | 1.326149  | -1.856554 |
| C | -1.128800 | 1.766643  | 1.197648  |
| H | -1.471587 | 2.443072  | 1.985639  |
| O | -1.747378 | 0.527438  | 1.512668  |
| H | 1.653597  | 0.798070  | 2.263959  |
| C | 0.381662  | 1.719574  | 1.190865  |
| H | 0.701019  | 1.029256  | 0.401714  |
| O | 0.836929  | 1.284674  | 2.442086  |
| C | 2.469162  | 2.960838  | 0.588504  |
| H | 2.978924  | 2.695353  | 1.519119  |
| H | 2.856035  | 3.919519  | 0.233410  |
| O | 2.702943  | 1.983774  | -0.418511 |
| C | -1.231291 | -0.640319 | 0.971012  |
| H | -0.140298 | -0.698102 | 1.086160  |
| C | -1.177744 | -1.858390 | -1.070136 |
| H | -0.083750 | -1.974859 | -1.022338 |
| O | -1.571210 | -0.672493 | -0.401357 |
| C | -1.895962 | -1.788000 | 1.710528  |
| H | -2.983068 | -1.642887 | 1.639391  |
| O | -1.472826 | -1.863876 | 3.048458  |
| H | -1.646221 | -1.018701 | 3.473886  |
| C | -1.526178 | -3.110523 | 1.064149  |
| H | -0.450625 | -3.283987 | 1.216073  |

|   |           |           |           |
|---|-----------|-----------|-----------|
| O | -2.286096 | -4.171946 | 1.593441  |
| H | -2.228473 | -4.136588 | 2.553488  |
| C | -1.803898 | -3.088721 | -0.428610 |
| H | -1.364662 | -3.986423 | -0.883274 |
| O | -3.205206 | -3.067457 | -0.673484 |
| H | -3.608929 | -3.734579 | -0.104647 |
| C | -1.583231 | -1.686915 | -2.523482 |
| H | -1.365910 | -2.598229 | -3.087460 |
| H | -1.034295 | -0.858858 | -2.973960 |
| O | -2.975978 | -1.368543 | -2.661046 |
| H | -3.456982 | -1.999840 | -2.090322 |
| C | 3.474468  | 0.883808  | -0.088750 |
| H | 4.461149  | 1.187264  | 0.302162  |
| C | 3.470807  | -1.112323 | 1.225517  |
| H | 4.496496  | -0.873594 | 1.547442  |
| O | 2.803801  | 0.111081  | 0.896106  |
| C | 3.607152  | 0.080623  | -1.373026 |
| H | 2.584776  | -0.110542 | -1.727080 |
| O | 4.365755  | 0.758106  | -2.343850 |
| H | 3.917520  | 1.581335  | -2.557477 |
| C | 4.288096  | -1.249173 | -1.120649 |
| H | 5.331960  | -1.062545 | -0.828121 |
| O | 4.234404  | -2.069305 | -2.266295 |
| H | 4.567243  | -1.561459 | -3.012910 |
| C | 3.586917  | -2.003719 | -0.001087 |
| H | 4.199868  | -2.874521 | 0.270542  |
| O | 2.303192  | -2.427437 | -0.421732 |
| H | 2.446383  | -2.834741 | -1.284650 |
| C | 2.716750  | -1.753571 | 2.365969  |
| H | 2.703532  | -1.098739 | 3.240320  |
| H | 3.201219  | -2.689079 | 2.654298  |
| H | 1.689139  | -1.977269 | 2.074855  |
| H | -3.157694 | -0.011289 | -2.367122 |

**Table S39:** XYZ-coordinates of [ $\beta$ -bn16+H]<sup>+</sup> ion (E').

|   |           |           |           |
|---|-----------|-----------|-----------|
| C | -0.915180 | 2.802992  | 1.029579  |
| H | -1.483213 | 2.516673  | 1.931390  |
| O | -1.161089 | 4.139023  | 0.697739  |
| H | -0.766541 | 4.729485  | 1.348360  |
| C | 0.817966  | 1.357079  | 1.628890  |
| H | 0.224160  | 1.042242  | 2.502407  |
| O | 0.447756  | 2.680715  | 1.256035  |
| C | -1.348692 | 1.949128  | -0.166193 |
| H | -0.820332 | 2.327344  | -1.049856 |
| N | -2.791041 | 1.992403  | -0.414619 |
| H | -3.280439 | 1.084316  | -0.383830 |
| C | -3.459306 | 2.982588  | -0.948803 |
| O | -2.957216 | 4.159110  | -1.121538 |
| C | -4.849510 | 2.781728  | -1.412371 |
| H | -5.360234 | 3.741580  | -1.463577 |
| H | -5.369937 | 2.093626  | -0.742353 |
| H | -4.823393 | 2.344423  | -2.416080 |
| C | -0.935409 | 0.493220  | 0.069076  |
| H | -1.541745 | 0.090939  | 0.890739  |
| O | -1.141252 | -0.244280 | -1.117838 |
| H | 1.814208  | -0.997948 | 0.721490  |
| C | 0.533124  | 0.416845  | 0.457797  |
| H | 1.135071  | 0.742543  | -0.398943 |
| O | 0.842057  | -0.908327 | 0.806543  |
| C | 2.275234  | 1.362493  | 2.040548  |
| H | 2.483540  | 0.437394  | 2.585601  |



|   |           |           |           |
|---|-----------|-----------|-----------|
| H | 2.453190  | 2.212248  | 2.707143  |
| O | 3.113235  | 1.471004  | 0.903018  |
| C | -2.076589 | -1.278168 | -1.086781 |
| H | -2.009942 | -1.743148 | -2.077743 |
| C | -4.457897 | -1.564587 | -0.863434 |
| H | -4.549854 | -2.078213 | -1.832151 |
| O | -3.347307 | -0.674301 | -0.906391 |
| C | -1.821603 | -2.323733 | -0.003343 |
| H | -1.808718 | -1.833149 | 0.978494  |
| O | -0.629241 | -3.018590 | -0.228080 |
| H | 0.086232  | -2.416060 | 0.033506  |
| C | -2.952899 | -3.334649 | 0.026918  |
| H | -2.964786 | -3.886687 | -0.925447 |
| O | -2.802819 | -4.216874 | 1.111673  |
| H | -1.895367 | -4.539787 | 1.099810  |
| C | -4.285471 | -2.629023 | 0.206031  |
| H | -5.095128 | -3.362659 | 0.091061  |
| O | -4.364662 | -2.014584 | 1.480391  |
| H | -4.112561 | -2.679411 | 2.131953  |
| C | -5.689595 | -0.696845 | -0.653417 |
| H | -6.557685 | -1.343857 | -0.476264 |
| H | -5.886545 | -0.122110 | -1.561990 |
| O | -5.511597 | 0.237683  | 0.387167  |
| H | -5.294511 | -0.267564 | 1.182569  |
| C | 4.117973  | 0.519566  | 0.811753  |
| H | 4.705413  | 0.476646  | 1.745436  |
| C | 4.463592  | -1.816455 | 0.426982  |
| H | 5.079497  | -1.859831 | 1.338009  |
| O | 3.520326  | -0.743416 | 0.581425  |
| C | 5.000140  | 0.899646  | -0.362365 |
| H | 4.358470  | 0.960292  | -1.250791 |
| O | 5.686731  | 2.107057  | -0.132498 |
| H | 5.046837  | 2.822843  | -0.104266 |
| C | 6.049169  | -0.174076 | -0.584525 |
| H | 6.714293  | -0.197355 | 0.292722  |
| O | 6.787182  | 0.072269  | -1.756936 |
| H | 7.098053  | 0.982401  | -1.728268 |
| C | 5.391805  | -1.538354 | -0.747320 |
| H | 6.181652  | -2.304317 | -0.738329 |
| O | 4.652327  | -1.598426 | -1.940598 |
| H | 5.226641  | -1.266035 | -2.639096 |
| C | 3.671469  | -3.091665 | 0.270627  |
| H | 3.031313  | -3.256193 | 1.140918  |
| H | 4.349825  | -3.943152 | 0.183561  |
| H | 3.063301  | -3.049193 | -0.634820 |
| H | -2.138845 | 4.303974  | -0.577802 |
